# Supplementary material for: Heterocycle-guided synthesis of m-hetarylanilines via three-component benzannulation
Source: publisher site journal article supplement (doi:10.3762/bjoc.20.188), 2024-09-02

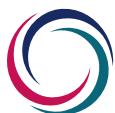

## Supporting Information

for

### Heterocycle-guided synthesis of *m*-hetarylanilines via three-component benzannulation

Andrey R. Galeev, Maksim V. Dmitriev, Alexander S. Novikov and Andrey N. Maslivets

*Beilstein J. Org. Chem.* **2024**, *20*, 2208–2216. doi:10.3762/bjoc.20.188

### Full experimental details, characterization data of new compounds and NMR spectra

## General information

$^1\text{H}$ ,  $^{13}\text{C}$  and  $^{19}\text{F}$  NMR spectra were recorded on a Bruker Avance III HD spectrometer (at 400, 101, 377 MHz, respectively) at 40 °C (313 K) in  $\text{CDCl}_3$  and  $\text{DMSO}-d_6$  using the residual solvent peak ( $\text{CDCl}_3$ :  $\delta\text{H} = 7.26$  ppm,  $\delta\text{C} = 77.16$  ppm;  $\text{DMSO}-d_6$ :  $\delta\text{H} = 2.50$  ppm;  $\delta\text{C} = 39.52$  ppm) as internal standards, for  $^{19}\text{F}$  spectra  $\text{C}_6\text{F}_6$  ( $\delta = -164.9$  ppm) was used as the internal standart. Splitting patterns of apparent multiplets were designated as s (singlet), d (doublet), t (triplet), q (quartet), m (multiplet), br (broadened). FTIR spectra were recorded on a Perkin–Elmer Spectrum Two spectrometer from mulls in mineral oil. Melting points were measured with Mettler Toledo MP70 Melting Point apparatus or Khimlabpribor PTP apparatus. Thin-layer chromatography (TLC) was performed on silica gel 60 F254 plates (Merck); spots were visualized with UV light (254 nm) or iodine vapors. HPLC analyses were performed on Hitachi Chromaster equipped with PDA detector Hitachi Chromaster 5430 (NUCLEODUR C18 Gravity column 3  $\mu\text{m}$ , 4  $\times$  150 mm). Elemental analyses were carried out on a Vario MICRO Cube analyzer. X-ray structural analyses were performed on an Xcalibur Ruby diffractometer using a Mo X-ray source (Mo  $\text{K}\alpha$  0.71073 Å), by scanning at 295(2) K. All solvents and reagents were purchased from commercial vendors and were used as received (PhMe and 1,4-dioxane were dried over Na and distilled).

## Synthesis of starting materials

### General procedure for the synthesis of 1,2,4-oxadiazole 1,3-diketones **1a**, **1h** and **1i** [1,2]

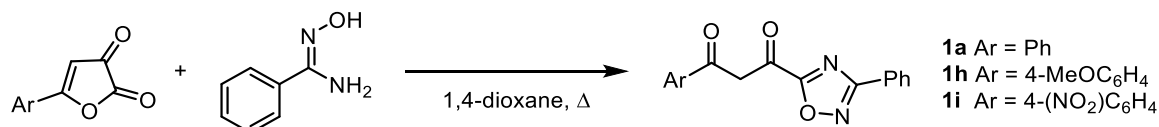

Benzamidoxime (1 equiv.) was added to a solution of 5-arylfuran-2,3-dione (1 equiv.) in dry 1,4-dioxane (10 mL/5 mmol of furan-2,3-dione) and the mixture was refluxed for 1 hour. The mixture was cooled, the solvent was evaporated and the residue was crystallized from EtOH.

**1-Phenyl-3-(3-phenyl-1,2,4-oxadiazol-5-yl)propane-1,3-dione (1a).** Yield 73%, beige powder, mp 132–133 °C (lit. 134–135 °C), *R<sub>f</sub>* 0.72 (PhMe/EtOAc 5:1). <sup>1</sup>H NMR (400 MHz, CDCl<sub>3</sub>) δ 15.63 (s, 1H), 8.18 (dd, *J* = 7.7, 1.9 Hz, 2H), 8.10 – 8.01 (m, 2H), 7.64 (t, *J* = 7.3 Hz, 1H), 7.58 – 7.48 (m, 5H), 7.30 (s, 1H). <sup>13</sup>C NMR (101 MHz, CDCl<sub>3</sub>) δ 189.1, 171.3, 169.5, 167.9, 134.4, 134.1, 131.8, 129.15 (2C), 129.12 (2C), 128.1 (2C), 127.8 (2C), 126.3, 97.8.

**1-(4-Methoxyphenyl)-3-(3-phenyl-1,2,4-oxadiazol-5-yl)propane-1,3-dione (1h).** Yield 68%, yellow powder, mp 133–134 °C (lit. 132–133 °C), *R<sub>f</sub>* 0.79 (PhMe/EtOAc 5:1). <sup>1</sup>H NMR (400 MHz, CDCl<sub>3</sub>) δ 15.80 (br.s, 1H), 8.19 – 8.15 (m, 2H), 8.04 (d, *J* = 9.0 Hz, 2H), 7.58 – 7.48 (m, 3H), 7.22 (s, 1H), 7.01 (d, *J* = 9.0 Hz, 2H), 3.90 (s, 3H). <sup>13</sup>C NMR (101 MHz, CDCl<sub>3</sub>) δ 188.9, 171.6, 169.5, 166.3, 164.8, 131.8, 130.5 (2C), 129.1 (2C), 127.8 (2C), 127.1, 126.3, 114.5 (2C), 97.5, 55.8.

**1-(4-Nitrophenyl)-3-(3-phenyl-1,2,4-oxadiazol-5-yl)propane-1,3-dione (1i).** Yield 60%, tan powder, mp 142–146 °C, *R<sub>f</sub>* 0.45 (PhMe/EtOAc 5:1). <sup>1</sup>H NMR (400 MHz, CDCl<sub>3</sub>) δ 14.71 (br.s, 1H), 8.37 (d, *J* = 8.9 Hz, 2H), 8.20 (d, *J* = 8.9 Hz, 2H), 8.18 – 8.11 (m, 2H), 7.62 – 7.48 (m, 3H), 7.33 (s, 1H). <sup>13</sup>C NMR (101 MHz, CDCl<sub>3</sub>) δ 185.2, 170.8, 170.1, 169.7, 150.9, 139.3, 132.0, 129.2 (2C), 128.9 (2C), 127.8 (2C), 126.0, 124.2 (2C), 98.3.

### 1-Phenyl-3-(5-phenyl-1,3,4-oxadiazol-2-yl)propane-1,3-dione (**1b**)

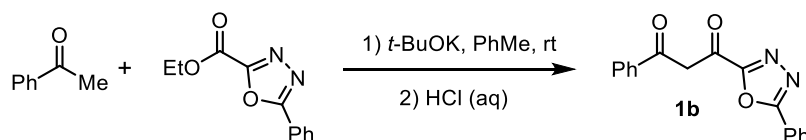

*t*-BuOK (1.68 g, 15 mmol, in two portions) was added to a solution of ethyl 5-phenyl-1,3,4-oxadiazole-2-carboxylate [3] (2.29 g, 10 mmol) and acetophenone (1.16 mL, 10 mmol) in 30 mL of dry PhMe. The mixture was stirred at rt for 1 day (color change from colorless to yellow-orange/reddish slurry). 20 mL of 1 M HCl was added to the mixture and stirred for 30 min, followed by extraction with CHCl<sub>3</sub> (2 × 50 mL). The combined organic extracts were washed with water (2 × 20 mL) and evaporated (without drying), the residue was crystallized from EtOH. Yield 1.28 g (44%), bright-yellow cotton-like solid, mp 209–210 °C, *R<sub>f</sub>* 0.49 (PhMe/EtOAc 5:1).

<sup>1</sup>H NMR (400 MHz, CDCl<sub>3</sub>) δ 15.57 (s, 1H), 8.27 – 8.14 (m, 2H), 8.07 – 7.93 (m, 2H), 7.71 – 7.42 (m, 6H), 7.30 (s, 1H). <sup>13</sup>C NMR (101 MHz, CDCl<sub>3</sub>) δ 184.7, 172.5, 166.5, 161.4, 133.7, 133.7, 132.8, 129.4 (2C), 129.1 (2C), 127.8 (2C), 127.7 (2C), 123.2, 96.1. Anal. Calcd for C<sub>17</sub>H<sub>12</sub>N<sub>2</sub>O<sub>3</sub>: C 69.86; H 4.14; N 9.58. Found: C 70.05; H 4.34; N 9.39.

### 1-(Benzo[d]thiazol-2-yl)-3-phenylpropane-1,3-dione (1c) [4]

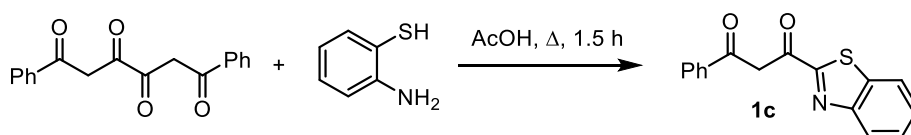

A solution of 1,6-diphenylhexane-1,3,4,6-tetraone (2.0 g, 6.8 mmol) and *o*-aminothiophenol (710  $\mu$ L, 6.8 mmol) in 20 mL of glacial acetic acid was refluxed for 1.5 h. The mixture was cooled and left overnight for crystallization. The formed particulate was filtered and recrystallized from AcOH. Yield 1.07 g (56%), mp 152–154 °C (lit. 153–155 °C).

### 1-Phenyl-3-(5-phenyloxazol-2-yl)propane-1,3-dione (1d)

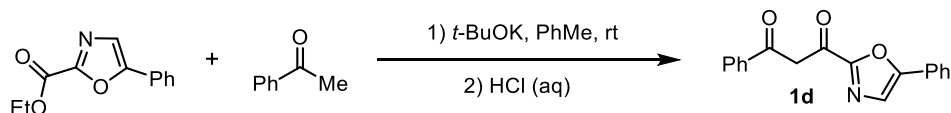

*t*-BuOK (1.22 g, 11 mmol, in one portion) was added to a solution of ethyl 5-phenyloxazole-2-carboxylate [5] (1.58 g, 7.3 mmol) and acetophenone (850  $\mu$ L, 7.3 mmol) in 30 mL dry PhMe. The mixture was stirred at rt for 5 h, then 1.5 mL AcOH was added and the mixture was stirred for another 30 min. The solvent was evaporated and the residue was crystallized from EtOH/H<sub>2</sub>O. Yield 1.42 g (67%), bright-yellow cotton-like solid, mp 176–178 °C.

**<sup>1</sup>H NMR** (400 MHz, CDCl<sub>3</sub>)  $\delta$  15.81 (s, 1H), 8.10 – 7.94 (m, 2H), 7.86 – 7.73 (m, 2H), 7.61 – 7.54 (m, 2H), 7.53 – 7.44 (m, 4H), 7.41 (t, *J* = 7.3 Hz, 1H), 7.20 (s, 1H). **<sup>13</sup>C NMR** (101 MHz, CDCl<sub>3</sub>)  $\delta$  183.9, 174.2, 157.2, 154.4, 134.3, 133.1, 129.9, 129.3 (2C), 128.9 (2C), 127.5 (2C), 127.1, 125.3 (2C), 124.5, 95.1. Anal. Calcd for C<sub>18</sub>H<sub>13</sub>NO<sub>3</sub>: C 74.22; H 4.50; N 4.81. Found: C 74.67; H 4.55; N 5.02.

### 1-Phenyl-3-(5-phenylisoxazol-3-yl)propane-1,3-dione (1e)

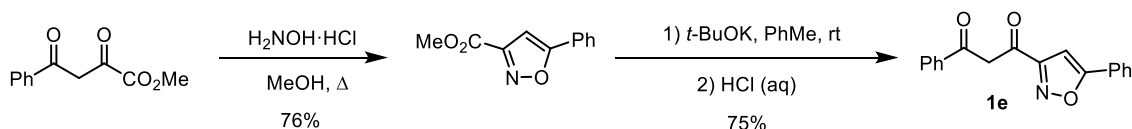

Synthesis of *methyl 5-phenylisoxazole-3-carboxylate*: hydroxylamine hydrochloride (2.52 g, 36 mmol) was added to a solution of methyl benzoylpyruvate (6.18 g, 30 mmol) in 30 mL of MeOH. The mixture refluxed for 3 h, cooled to rt and placed in a refrigerator for 2 h. The formed precipitate was filtered and washed with a small amount of cooled MeOH. Yield 4.63 g (76%), off-white powder, mp 79–81 °C (lit. 80–82 °C [Synthesis, **2013**, 45(2), 260–4]).

*t*-BuOK (1.34 g, 12 mmol, in one portion) was added to a solution of methyl 5-phenylisoxazole-3-carboxylate (2.03 g, 10 mmol) and acetophenone (1170  $\mu$ L, 10 mmol) in 40 mL of dry PhMe. The mixture was stirred at rt for 1 day (color change from colorless to yellow-orange). 20 mL of 1M HCl and 20 mL of H<sub>2</sub>O were added to the mixture, the resulting mixture was stirred for 30 min, the phases were separated and the aqueous phase was extracted with PhMe (20 mL). The combined organic extracts were washed with water (2  $\times$  30 mL) and evaporated (without drying), the residue was crystallized from EtOH/CH<sub>2</sub>Cl<sub>2</sub>. Yield 2.19 g (75%), off-white cotton-like solid, mp 138–139 °C, *R*<sub>f</sub> 0.84 (PhMe/EtOAc 5:1).

**<sup>1</sup>H NMR** (400 MHz, CDCl<sub>3</sub>)  $\delta$  15.86 (s, 1H), 8.04 – 7.97 (m, 2H), 7.87 – 7.74 (m, 2H), 7.57 (t, *J* = 7.3 Hz, 1H), 7.53 – 7.43 (m, 5H), 7.13 (s, 1H), 6.98 (s, 1H). **<sup>13</sup>C NMR** (101 MHz, CDCl<sub>3</sub>)  $\delta$  184.2, 179.2, 171.7, 161.8, 134.3, 133.1, 130.8, 129.2 (2C), 128.9 (2C), 127.5 (2C), 127.0, 126.1 (2C), 98.3, 95.1. Anal. Calcd for C<sub>18</sub>H<sub>13</sub>NO<sub>3</sub>: C 74.22; H 4.50; N 4.81. Found: C 74.54; H 4.73; N 5.01.

### 1-(Furan-2-yl)-3-phenylpropane-1,3-dione (1f)

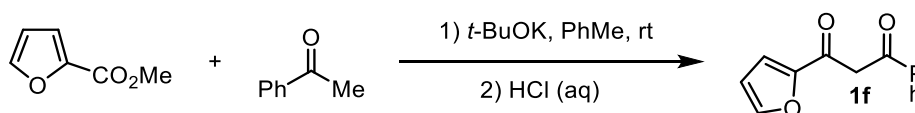

Similar to the literature method [6]: *t*-BuOK (3.2 g, 28.5 mmol, in one portion) was added to a solution of methyl furan-2-carboxylate (2 mL, 19 mmol) and acetophenone (2.2 mL, 19 mmol) in 30 mL dry PhMe. The mixture was stirred at rt for 1 day (color change from colorless to orange). 3.2 mL AcOH and 50 mL H<sub>2</sub>O were added to the mixture and stirred for 1 hour. The phases were separated and the aqueous phase was extracted with EtOAc (2 × 25 mL). The combined organic phase was washed with water (2 × 50 mL) and evaporated to give a yellow-orange oil. EtOH was added to the oil and the resulting solution was placed in a freezer overnight. The precipitate was filtered and washed with a small amount of cooled EtOH and hexane. Yield 1.6 g (40%), beige solid, mp 66–68 °C (lit. 66 °C [7]), *R*<sub>f</sub> 0.74 (PhMe/EtOAc 5:1).

**<sup>1</sup>H NMR** (400 MHz, CDCl<sub>3</sub>) δ 16.12 (s, 1H), 8.01 – 7.85 (m, 2H), 7.63 – 7.59 (m, 1H), 7.54 (t, *J* = 7.3 Hz, 1H), 7.48 (t, *J* = 7.3 Hz, 2H), 7.24 (d, *J* = 3.5 Hz, 1H), 6.77 (s, 1H), 6.58 (dd, *J* = 3.5, 1.7 Hz, 1H). **<sup>13</sup>C NMR** (101 MHz, CDCl<sub>3</sub>) δ 182.9, 177.6, 151.3, 146.2, 135.0, 132.5, 128.8 (2C), 127.2 (2C), 115.8, 112.8, 92.9.

### 1-(5-Methyl-1-phenyl-1*H*-1,2,3-triazol-4-yl)-3-phenylpropane-1,3-dione (1g)

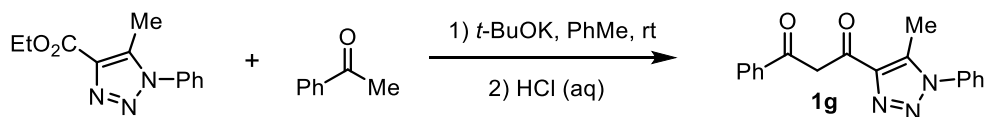

*t*-BuOK (850 mg, 7.55 mmol, in one portion) was added to a solution of ethyl ethyl 5-methyl-1-phenyl-1*H*-1,2,3-triazole-4-carboxylate [8] (1.16 g, 5 mmol) and acetophenone (595 μL, 5 mmol) in 10 mL of dry PhMe. The mixture was stirred at rt for 1 day (color change from colorless to orange-red). 10 mL of 1M HCl and 20 mL of H<sub>2</sub>O were added to the mixture and stirred for 30 min, followed by extraction with EtOAc (2 × 30 mL). The combined organic extracts were washed with water (2 × 20 mL) and evaporated (without drying), the residue was crystallized from EtOH/H<sub>2</sub>O, filtered and washed with EtOH/H<sub>2</sub>O and hexane. Yield 672 mg (44%), beige powder, mp 114–116 °C.

**<sup>1</sup>H NMR** (400 MHz, CDCl<sub>3</sub>, enol OH not found) δ 8.06 – 8.00 (m, 2H), 7.65 – 7.55 (m, 3H), 7.54 – 7.44 (m, 5H), 7.40 (s, 1H), 2.68 (s, 3H). **<sup>13</sup>C NMR** (101 MHz, CDCl<sub>3</sub>) δ 184.4, 181.2, 142.0, 137.4, 135.7, 134.7, 132.4, 130.1, 129.8 (2C), 128.8 (2C), 127.2 (2C), 125.5 (2C), 94.8, 10.4. Anal. Calcd for C<sub>18</sub>H<sub>15</sub>N<sub>3</sub>O<sub>2</sub>: C 70.81; H 4.95; N 13.76. Found: C 71.08; H 5.17; N 13.87.

## Synthesis of products 3

**General procedure A:** 1,3-Diketone **1a–g**, acetone (and chloroform if necessary) and amine (1.1 or 1.5 equiv) were added to a reaction vial. The vial was placed in a preheated (60 °C, thermocouple) heating block and stirred for the indicated time. After completion, the reaction mixture was filtered to remove molecular sieves and purified by recrystallization or column chromatography.

**General procedure B:** 1,3-Diketone **1a–g**, acetone (and chloroform if necessary), molecular sieves 3 Å (300 mg per 0.5 mmol of diketone), acetic acid (30 mol %) and amine were added to a reaction vial. The vial was placed in a preheated (60 °C, thermocouple) heating block and stirred for the indicated time. After completion, the reaction mixture was filtered to remove molecular sieves and purified by recrystallization or column chromatography.

### *N*-Benzyl-5-(3-phenyl-1,2,4-oxadiazol-5-yl)-[1,1'-biphenyl]-3-amine (**3aa**)

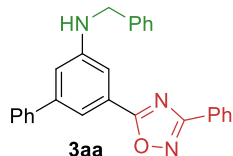

According to the **GP A**; from 1,3-diketone **1a** (0.5 mmol), amine **2a** (0.55 mmol) and acetone (2 mL); reaction time 1 d, recrystallized from EtOH. Beige powder, 148 mg (73%), mp 151–153 °C,  $R_f$  = 0.64 (PhMe).

**<sup>1</sup>H NMR** (400 MHz, CDCl<sub>3</sub>)  $\delta$  8.26 – 8.11 (m, 2H), 7.83 (d,  $J$  = 1.6 Hz, 1H), 7.61 (dd,  $J$  = 7.2, 1.9 Hz, 2H), 7.53 – 7.50 (m, 4H), 7.48 – 7.28 (m, 8H), 7.08 (t,  $J$  = 1.9 Hz, 1H), 5.03 (s, 1H), 4.48 (s, 2H). **<sup>13</sup>C NMR** (101 MHz, CDCl<sub>3</sub>)  $\delta$  176.2, 169.1, 148.5, 143.6, 140.5, 138.4, 131.2, 129.97 (4C), 129.95 (2C), 128.0, 127.9 (2C), 127.8, 127.7 (2C), 127.3 (3C), 125.8, 117.0, 116.4, 111.3, 48.9. IR (mineral oil), cm<sup>-1</sup>: 3432, 1613, 1581, 1562, 1464, 1455, 1445. Anal. Calcd for C<sub>27</sub>H<sub>21</sub>N<sub>3</sub>O: C 80.37; H 5.25; N 10.41. Found: C 80.60; H 5.44; N 10.51.

### 4-(5-(3-Phenyl-1,2,4-oxadiazol-5-yl)-[1,1'-biphenyl]-3-yl)morpholine (**3ab**)

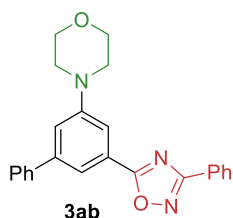

According to the **GP A**; from 1,3-diketone **1a** (0.5 mmol), amine **2b** (0.55 mmol) and acetone (2 mL); reaction time 1 d, recrystallized from EtOH. Beige powder, 156 mg (81%), mp 172–174 °C,  $R_f$  = 0.6 (PhMe/EtOAc 5:1).

**<sup>1</sup>H NMR** (400 MHz, CDCl<sub>3</sub>)  $\delta$  8.23 – 8.16 (m, 2H), 7.95 (t,  $J$  = 1.5 Hz, 1H), 7.73 (dd,  $J$  = 2.5, 1.4 Hz, 1H), 7.67 – 7.63 (m, 2H), 7.55 – 7.45 (m, 5H), 7.44 – 7.37 (m, 1H), 7.35 (t,  $J$  = 2.0 Hz, 1H), 4.00 – 3.88 (m, 4H), 3.43 – 3.29 (m, 4H). **<sup>13</sup>C NMR** (101 MHz, CDCl<sub>3</sub>)  $\delta$  176.1, 169.2, 152.1, 143.6, 140.6, 131.3, 129.0 (2C), 128.97 (2C), 128.1, 127.7 (2C), 127.4 (2C), 127.2, 125.7, 118.8, 118.7, 113.8, 66.9 (2C), 49.3 (2C). IR (mineral oil), cm<sup>-1</sup>: 1581, 1589, 1556, 1462, 1447. Anal. Calcd for C<sub>24</sub>H<sub>21</sub>N<sub>3</sub>O<sub>2</sub>: C 75.18; H 5.52; N 10.96. Found: C 75.43; H 5.71; N 10.78.

### *N*-Phenyl-5-(3-phenyl-1,2,4-oxadiazol-5-yl)-[1,1'-biphenyl]-3-amine (**3ac**)

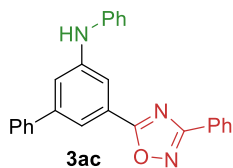

According to the **GP B**; from 1,3-diketone **1a** (0.5 mmol), amine **2c** (0.55 mmol) and acetone (2 mL); reaction time 1 d, flash column chromatography (PhMe/hexane 2:1). Off-white wool-like compound, 146 mg. (75%), mp 164–165 °C,  $R_f$  = 0.3 (PhMe/hexane 2:1).

**<sup>1</sup>H NMR** (400 MHz, CDCl<sub>3</sub>)  $\delta$  8.24 – 8.12 (m, 2H), 7.98 (t,  $J$  = 1.5 Hz, 1H), 7.85 (t,  $J$  = 1.8 Hz, 1H), 7.67 – 7.60 (m, 2H), 7.55 – 7.44 (m, 6H), 7.44 – 7.32 (m, 3H), 7.21 (d,  $J$  = 7.3 Hz, 2H), 7.06 (t,  $J$  = 7.4 Hz, 1H), 5.62 (s, 1H). **<sup>13</sup>C NMR** (101 MHz, CDCl<sub>3</sub>)  $\delta$  175.9, 169.2, 144.9, 143.7, 142.1, 140.1, 131.3, 129.8 (2C), 129.05 (2C), 129.0 (2C), 128.2, 127.7 (2C), 127.3 (2C), 127.2, 126.0, 122.6, 119.6, 119.4 (2C), 119.3, 115.1. IR (mineral oil), cm<sup>-1</sup>: 3324,

1591, 1561, 1525, 1496, 1462. Anal. Calcd for C<sub>26</sub>H<sub>19</sub>N<sub>3</sub>O: C 80.18; H 4.92; N 10.79. Found: C 80.30; H 5.05; N 10.86.

#### ***N*-Benzyl-5-(5-phenyl-1,3,4-oxadiazol-2-yl)-[1,1'-biphenyl]-3-amine (3ba)**

According to the **GP A**; from 1,3-diketone **1b** (0.5 mmol), amine **2a** (0.55 mmol), acetone (2 mL) and CHCl<sub>3</sub> (1 mL); reaction time 2 d, recrystallized from EtOH. Off-white compound, 149 mg (74%), mp 198–200 °C, *R*<sub>f</sub> = 0.54 (PhMe/EtOAc 5:1).

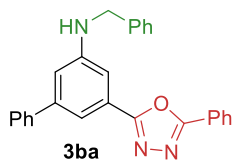

<sup>1</sup>H NMR (400 MHz, DMSO-*d*<sub>6</sub>) δ 8.18 – 8.08 (m, 2H), 7.69 – 7.60 (m, 5H), 7.52 (d, *J* = 1.6 Hz, 1H), 7.51 – 7.42 (m, 4H), 7.42 – 7.32 (m, 4H), 7.25 (t, *J* = 7.3 Hz, 1H), 7.10 (t, *J* = 1.9 Hz, 1H), 6.78 (t, *J* = 6.0 Hz, 1H), 4.45 (d, *J* = 5.9 Hz, 2H). <sup>13</sup>C NMR (101 MHz, DMSO-*d*<sub>6</sub>) δ 164.4, 163.7, 149.6, 142.0, 139.8, 139.6, 131.8, 129.3 (2C), 128.8 (2C), 128.3 (2C), 127.7, 127.2 (2C), 126.7, 126.6 (2C), 126.5 (2C), 124.3, 123.3, 113.8, 112.4, 109.0, 46.3. IR (mineral oil), cm<sup>-1</sup>: 3340, 1601, 1579, 1551, 1462. Anal. Calcd for C<sub>27</sub>H<sub>21</sub>N<sub>3</sub>O: C 80.37; H 5.25; N 10.41. Found: C 80.75; H 5.18; N 10.58.

#### **4-(5-(5-Phenyl-1,3,4-oxadiazol-2-yl)-[1,1'-biphenyl]-3-yl)morpholine (3bb)**

According to the **GP A**; from 1,3-diketone **1b** (0.5 mmol), amine **2b** (0.55 mmol), molecular sieves 3 Å (300 mg), acetone (2 mL) and CHCl<sub>3</sub> (1 mL); reaction time 1 d, recrystallized from EtOH/Me<sub>2</sub>CO. Beige powder, 140 mg (73%), mp 203–205 °C, *R*<sub>f</sub> = 0.26 (PhMe/EtOAc 5:1).

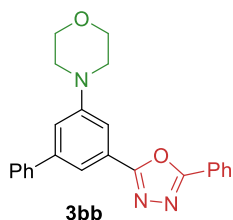

<sup>1</sup>H NMR (400 MHz, CDCl<sub>3</sub>) δ 8.21 – 8.11 (m, 2H), 7.82 (t, *J* = 1.5 Hz, 1H), 7.68 (dd, *J* = 2.5, 1.4 Hz, 1H), 7.66 – 7.61 (m, 2H), 7.59 – 7.51 (m, 3H), 7.48 (t, *J* = 7.4 Hz, 2H), 7.40 (t, *J* = 7.3 Hz, 1H), 7.27 (dd, *J* = 2.5, 1.5 Hz, 1H), 4.39 – 3.71 (m, 4H), 3.61 – 3.03 (m, 4H). <sup>13</sup>C NMR (101 MHz, CDCl<sub>3</sub>) δ 165.1, 164.8, 152.2, 143.6, 140.8, 131.8, 129.2 (2C), 129.0 (2C), 128.1, 127.4 (2C), 127.1 (2C), 125.4, 124.2, 117.8, 117.4, 112.6, 66.9 (2C), 49.3 (2C). IR (mineral oil), cm<sup>-1</sup>: 1595, 1588, 1574, 1540, 1487, 1462. Anal. Calcd for C<sub>24</sub>H<sub>21</sub>N<sub>3</sub>O<sub>2</sub>: C 75.18; H 5.52; N 10.96. Found: C 75.61; H 5.32; N 11.13.

#### **5-(Benzo[*d*]thiazol-2-yl)-*N*-benzyl-[1,1'-biphenyl]-3-amine (3ca)**

According to the **GP A**; from 1,3-diketone **1c** (0.5 mmol), amine **2a** (0.75 mmol), acetone (1 mL) and CHCl<sub>3</sub> (1 mL); reaction time 3 d, recrystallized from EtOH. Light-yellow powder, 148 mg (76%), mp 143–145 °C, *R*<sub>f</sub> = 0.26 (Hexane/EtOAc 5:1).

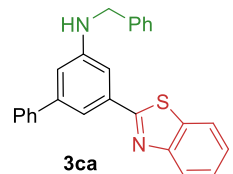

<sup>1</sup>H NMR (400 MHz, CDCl<sub>3</sub>) δ 8.09 (d, *J* = 8.2 Hz, 1H), 7.90 (dd, *J* = 8.1, 1.1 Hz, 1H), 7.67 (t, *J* = 1.5 Hz, 1H), 7.65 – 7.60 (m, 2H), 7.53 – 7.41 (m, 6H), 7.41 – 7.34 (m, 4H), 7.34 – 7.28 (m, 1H), 6.99 (t, *J* = 1.9 Hz, 1H), 4.48 (s, 2H), 4.36 (br. s, 1H). <sup>13</sup>C NMR (101 MHz, CDCl<sub>3</sub>) δ 168.6, 154.3, 148.6, 143.4, 141.0, 138.8, 135.3, 135.1, 128.91 (2C), 128.86 (2C), 127.9 (2C), 127.8, 127.7, 127.4 (2C), 126.4, 125.2, 123.4, 121.7, 116.8, 114.7, 111.0, 48.9. IR (mineral oil), cm<sup>-1</sup>: 3269, 1595, 1575, 1558, 1533, 1487, 1457. Anal. Calcd for C<sub>26</sub>H<sub>20</sub>N<sub>2</sub>S: C 79.56; H 5.14; N 7.14; S 8.17. Found: C 79.99; H 5.31; N 7.02 S 8.32.

#### **4-(5-(Benzo[*d*]thiazol-2-yl)-[1,1'-biphenyl]-3-yl)morpholine (3cb)**

According to the **GP A**; from 1,3-diketone **1c** (0.5 mmol), amine **2b** (0.75 mmol), acetone (1 mL) and CHCl<sub>3</sub> (1 mL); reaction time 4 d, recrystallized from EtOH. Beige powder, 108 mg (58%), mp 165–167 °C, *R*<sub>f</sub> = 0.50 (PhMe/EtOAc 5:1).

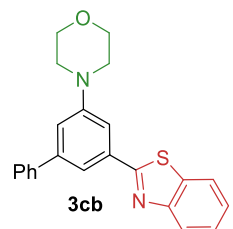

<sup>1</sup>H NMR (400 MHz, CDCl<sub>3</sub>) δ 8.10 (d, *J* = 8.2 Hz, 1H), 7.92 (dd, *J* = 8.0, 1.2 Hz, 1H), 7.82 – 7.76 (m, 1H), 7.72 (t, *J* = 1.9 Hz, 1H), 7.69 – 7.63 (m, 2H), 7.56 – 7.44 (m, 3H), 7.40 (td, *J*

= 7.6, 1.3 Hz, 2H), 7.26 (s, 1H), 4.05 – 3.87 (m, 4H), 3.44 – 3.26 (m, 4H). <sup>13</sup>C NMR (101 MHz, CDCl<sub>3</sub>) δ 168.5, 154.3, 152.1, 143.5, 141.0, 135.3, 135.1, 129.0 (2C), 127.9, 127.5 (2C), 126.5, 125.4, 123.4, 121.7, 118.9, 117.4, 113.4, 67.0 (2C), 49.6 (2C). IR (mineral oil), cm<sup>-1</sup>: 1591, 1574, 1508, 1493, 1461. Anal. Calcd for C<sub>23</sub>H<sub>20</sub>N<sub>2</sub>OS: C 74.16; H 5.41; N 7.52; S 8.61. Found: C 74.44; H 5.45; N 7.54 S 8.49.

#### ***N*-Benzyl-5-(5-phenyloxazol-2-yl)-[1,1'-biphenyl]-3-amine (3da)**

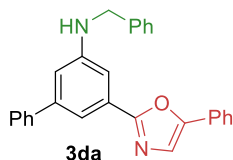

According to the **GP B**; from 1,3-diketone **1d** (0.5 mmol), amine **2a** (0.75 mmol), AcOH (30 mol %), molecular sieves 3 Å (300 mg) and acetone (2 mL); reaction time 4 d, recrystallized from EtOH. Beige-yellow powder, 90 mg (45%), mp 163–165 °C, *R*<sub>f</sub> = 0.57 (PhMe/EtOAc 5:1).

<sup>1</sup>H NMR (400 MHz, CDCl<sub>3</sub>) δ 7.80 – 7.67 (m, 3H), 7.63 (d, *J* = 7.0 Hz, 2H), 7.50 – 7.28 (m, 13H), 6.95 (t, *J* = 1.9 Hz, 1H), 4.48 (s, 2H), 4.45 (br. s, 1H). <sup>13</sup>C NMR (101 MHz, CDCl<sub>3</sub>) δ 161.7, 151.3, 149.0, 143.2, 141.1, 139.2, 129.0 (2C), 128.9 (3C), 128.8 (2C), 128.5, 128.3, 127.8 (2C), 127.7, 127.6, 127.4 (2C), 124.4 (2C), 123.6, 115.0, 113.9, 109.5, 48.6. IR (mineral oil), cm<sup>-1</sup>: 3432, 1598, 1576, 1534, 1516, 1490, 1463. Anal. Calcd for C<sub>28</sub>H<sub>22</sub>N<sub>2</sub>O: C 83.56; H 5.51; N 6.96. Found: C 83.69; H 5.68; N 7.05.

#### **4-(5-(5-Phenyloxazol-2-yl)-[1,1'-biphenyl]-3-yl)morpholine (3db)**

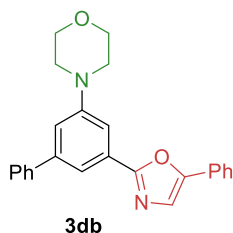

According to the **GP A**; from 1,3-diketone **1d** (0.5 mmol), amine **2b** (0.75 mmol), acetone (1 mL), CHCl<sub>3</sub> (1 mL) and 1.5 equiv of AcOH (45 uL); reaction time 4 d, recrystallized from EtOH. Beige-yellow powder, 78 mg (41%), mp 165–167 °C, *R*<sub>f</sub> = 0.35 (PhMe/EtOAc 5:1, 1% AcOH).

<sup>1</sup>H NMR (400 MHz, CDCl<sub>3</sub>) δ 7.84 (t, *J* = 1.5 Hz, 1H), 7.78 – 7.72 (m, 2H), 7.68 – 7.63 (m, 3H), 7.52 – 7.42 (m, 5H), 7.42 – 7.32 (m, 2H), 7.21 (dd, *J* = 2.5, 1.5 Hz, 1H), 4.01 – 3.86 (m, 4H), 3.43 – 3.24 (m, 4H). <sup>13</sup>C NMR (101 MHz, CDCl<sub>3</sub>) δ 161.6, 152.2, 151.5, 143.3, 141.2, 129.1 (2C), 128.93 (2C), 128.88, 128.6, 128.2, 127.9, 127.5 (2C), 124.5 (2C), 123.6, 117.1, 116.7, 112.3, 67.0 (2C), 49.5 (2C). IR (mineral oil), cm<sup>-1</sup>: 1594, 1572, 1532, 1497, 1487, 1460. Anal. Calcd for C<sub>25</sub>H<sub>22</sub>N<sub>2</sub>O<sub>2</sub>: C 78.51; H 5.80; N 7.32. Found: C 78.70; H 5.97; N 7.46.

#### ***N*-Benzyl-5-(5-phenylisoxazol-3-yl)-[1,1'-biphenyl]-3-amine (3ea)**

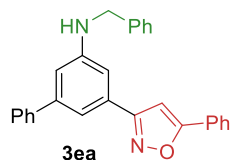

According to the **GP A**; from 1,3-diketone **1e** (0.3 mmol), amine **2a** (0.45 mmol), acetone (1 mL) and molecular sieves 3 Å (300 mg); reaction time 6d; purified via flash column chromatography (PhMe/hexane 6:1). Off-white powder, 26 mg (21%), mp 114–116 °C, *R*<sub>f</sub> = 0.34 (PhMe/hexane 5:1).

<sup>1</sup>H NMR (400 MHz, CDCl<sub>3</sub>) δ 7.92 – 7.80 (m, 2H), 7.65 – 7.56 (m, 2H), 7.53 – 7.34 (m, 11H), 7.34 – 7.28 (m, 1H), 7.20 (t, *J* = 1.9 Hz, 1H), 6.94 (t, *J* = 1.9 Hz, 1H), 6.82 (s, 1H), 4.46 (s, 2H), 4.28 (s, 1H). <sup>13</sup>C NMR (101 MHz, CDCl<sub>3</sub>) δ 170.4, 163.5, 149.1, 143.3, 141.3, 139.2, 130.6, 130.3, 129.1 (2C), 128.9 (2C), 128.8 (2C), 127.8, 127.78, 127.75 (2C), 127.6, 127.4 (2C), 126.0 (2C), 115.7, 113.5, 110.0, 97.9, 48.6. IR (mineral oil), cm<sup>-1</sup>: 3338, 1606, 1573, 1542, 1494, 1459. Anal. Calcd for C<sub>28</sub>H<sub>22</sub>N<sub>2</sub>O: C 83.56; H 5.51; N 6.96. Found: C 83.98; H 5.62; N 7.21.



### ***N*-Benzyl-5-(furan-2-yl)-[1,1'-biphenyl]-3-amine (3fa)**

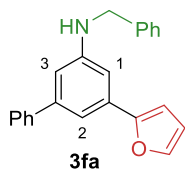

According to the **GP A**; from 1,3-diketone **1f** (0.5 mmol), amine **2j** (2.5 mmol), AcOH (30 mol %) and acetone (2 mL); reaction time 7 d, isolated via flash column chromatography (PhMe/hexane 1:2). Yellow oil, 29 mg (18%),  $R_f = 0.45$  (PhMe/hexane 1:1). Note: this product was not isolated in pure form due to the presence of many side-products that complicate isolation. Crude yield is provided. The presence of the protons  $H^1/H^2/H^3$  (dd or t due to the characteristic W-coupling) of the central benzene ring confirms the formation of the product **3fa**.

**$^1H$  NMR** (400 MHz,  $CDCl_3$ )  $\delta$  7.64 – 7.58 (m, 2H), 7.48 – 7.27 (m, 10H), 7.07 – 6.95 (m, 1H), 6.78 (t,  $J = 1.9$  Hz, 1H), 6.65 (d,  $J = 3.3$  Hz, 1H), 6.48 (dd,  $J = 3.3, 1.8$  Hz, 1H), 4.44 (s, 2H), 3.92 (s, 1H).  **$^{13}C$  NMR** (101 MHz,  $CDCl_3$ )  $\delta$  154.5, 149.0, 143.0, 142.0, 141.7, 139.4, 132.4, 128.84 (2C), 128.76 (2C), 127.8 (2C), 127.5, 127.5, 127.3 (2C), 113.0, 111.7, 111.2, 107.4, 105.3, 48.6.

### ***N*-Benzyl-4'-methoxy-5-(3-phenyl-1,2,4-oxadiazol-5-yl)-[1,1'-biphenyl]-3-amine (3ha)**

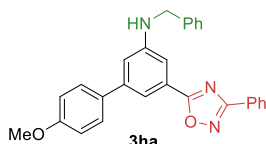

According to the **GP A**; from 1,3-diketone **1h** (0.5 mmol), amine **2a** (0.55 mmol) and acetone (2 mL); reaction time 1 d, recrystallized from EtOH. Off-white powder, 167 mg (77%), mp 149–150 °C,  $R_f = 0.85$  (PhMe/EtOAc 5:1).

**$^1H$  NMR** (400 MHz,  $CDCl_3$ )  $\delta$  8.26 – 8.16 (m, 2H), 7.77 (s, 1H), 7.63 – 7.48 (m, 5H), 7.46 – 7.35 (m, 5H), 7.31 (t,  $J = 7.1$  Hz, 1H), 7.06 – 6.93 (m, 3H), 4.46 (d,  $J = 5.3$  Hz, 2H), 4.34 (t,  $J = 5.3$  Hz, 1H), 3.86 (s, 3H).  **$^{13}C$  NMR** (101 MHz,  $CDCl_3$ )  $\delta$  176.4, 169.1, 159.8, 149.1, 143.1, 138.9, 133.1, 131.2, 128.9 (4C), 128.4 (2C), 127.8 (2C), 127.72 (2C), 127.68, 127.4, 125.7, 116.2, 115.4, 114.5 (2C), 110.3, 55.5, 48.5. IR (mineral oil),  $cm^{-1}$ : 3447, 1610, 1582, 1560, 1521, 1505. Anal. Calcd for  $C_{28}H_{23}N_3O_2$ : C 77.58; H 5.35; N 9.69. Found: C 77.76; H 5.24; N 9.75.

### ***N*-Benzyl-4'-nitro-5-(3-phenyl-1,2,4-oxadiazol-5-yl)-[1,1'-biphenyl]-3-amine (3ia)**

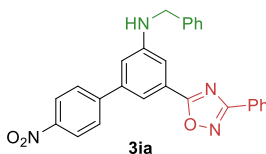

According to the **GP A**; from 1,3-diketone **1i** (0.5 mmol), amine **2a** (0.55 mmol) and acetone (2 mL); reaction time 1 d, recrystallized from EtOH. Light-orange powder, 161 mg (72%), mp 189–191 °C,  $R_f = 0.84$  (PhMe/EtOAc 5:1).

**$^1H$  NMR** (400 MHz,  $DMSO-d_6$ )  $\delta$  8.25 (d,  $J = 8.9$  Hz, 2H), 8.12 – 8.00 (m, 2H), 7.87 (d,  $J = 8.9$  Hz, 2H), 7.65 – 7.51 (m, 4H), 7.44 (dd,  $J = 2.3, 1.4$  Hz, 1H), 7.42 – 7.36 (m, 2H), 7.30 (t,  $J = 7.6$  Hz, 2H), 7.22 – 7.16 (m, 2H), 6.90 (t,  $J = 5.8$  Hz, 1H), 4.42 (d,  $J = 5.8$  Hz, 2H).  **$^{13}C$  NMR** (101 MHz,  $DMSO-d_6$ )  $\delta$  175.6, 168.1, 149.9, 146.9, 146.0, 139.8, 139.2, 131.5, 129.1 (2C), 128.3 (2C), 127.8 (2C), 127.2 (2C), 127.0 (2C), 126.8, 126.1, 124.7 (2C), 124.0, 114.8, 113.6, 111.5, 46.2. IR (mineral oil),  $cm^{-1}$ : 3418, 1597, 1557, 1512. Anal. Calcd for  $C_{27}H_{20}N_4O_3$ : C 72.31; H 4.50; N 12.49. Found: C 72.65; H 4.41; N 12.55.

### **2-((5-(3-Phenyl-1,2,4-oxadiazol-5-yl)-[1,1'-biphenyl]-3-yl)amino)phenol (3ad)**

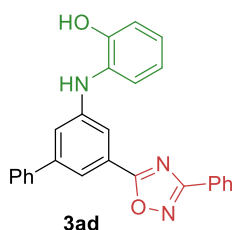

According to the **GP B**; from 1,3-diketone **1a** (0.5 mmol), amine **2d** (0.75 mmol) and acetone (2 mL); reaction time 1 d; recrystallized from EtOH. Beige powder, 143 mg (70%), mp 203–205 °C.  $R_f = 0.55$  (PhMe/EtOAc 5:1).

**$^1H$  NMR** (400 MHz,  $DMSO-d_6$ )  $\delta$  9.52 (s, 1H), 8.15 – 8.03 (m, 2H), 7.88 (s, 1H), 7.72 (t,  $J = 1.6$  Hz, 1H), 7.70 – 7.64 (m, 3H), 7.63 – 7.56 (m, 3H), 7.51 (t,  $J = 7.6$  Hz, 2H), 7.45 – 7.39 (m, 2H), 7.28 (d,  $J = 7.2$  Hz, 1H), 6.99 – 6.91 (m, 2H), 6.88 – 6.80 (m, 1H).  **$^{13}C$  NMR** (101 MHz,  $DMSO-d_6$ )  $\delta$  175.7, 168.1, 149.9, 146.8, 142.1, 139.5, 131.5, 129.1 (2C), 128.9 (2C),

128.8, 127.9, 127.0 (2C), 126.6 (2C), 126.1, 124.4, 123.8, 122.1, 119.3, 117.5, 116.0, 115.3, 112.2. IR (mineral oil),  $\text{cm}^{-1}$ : 3479, 3327, 1598, 1557, 1494, 1460. Anal. Calcd for  $\text{C}_{26}\text{H}_{19}\text{N}_3\text{O}_2$ : C 77.02; H 4.72; N 10.36. Found: C 77.17; H 4.87; N 10.44.

### 2-((5-(3-Phenyl-1,2,4-oxadiazol-5-yl)-[1,1'-biphenyl]-3-yl)amino)ethan-1-ol (3ae)

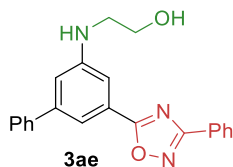

According to the **GP A**; from 1,3-diketone **1a** (0.5 mmol), amine **2e** (0.55 mmol) and acetone (2 mL); reaction time 1 d; recrystallized from  $\text{Et}_2\text{O}$ /hexane. Off-white powder, 136 mg (76%), mp 125–128 °C,  $R_f$  = 0.17 (PhMe/EtOAc 5:1).

$^1\text{H}$  NMR (400 MHz,  $\text{CDCl}_3$ )  $\delta$  8.24 – 8.11 (m, 2H), 7.81 (d,  $J$  = 1.5 Hz, 1H), 7.62 (d,  $J$  = 7.1 Hz, 2H), 7.53 – 7.42 (m, 6H), 7.38 (t,  $J$  = 7.3 Hz, 1H), 7.11 (t,  $J$  = 1.9 Hz, 1H), 3.94 (t,  $J$  = 5.2 Hz, 2H), 3.46 (t,  $J$  = 5.2 Hz, 2H), 3.30 (s, 2H).  $^{13}\text{C}$  NMR (101 MHz,  $\text{CDCl}_3$ )  $\delta$  176.2, 169.1, 148.6, 143.6, 140.4, 131.3, 128.99 (2C), 128.96 (2C), 128.1, 127.7 (2C), 127.3 (2C), 127.2, 125.8, 117.3, 116.8, 111.4, 61.2, 46.7. IR (mineral oil),  $\text{cm}^{-1}$ : 3382, 3247, 1599, 1579, 1558, 1526, 1461. Anal. Calcd for  $\text{C}_{22}\text{H}_{19}\text{N}_3\text{O}_2$ : C 73.93; H 5.36; N 11.76. Found: C 74.18; H 5.44; N 11.95.

### N-(5-(3-Phenyl-1,2,4-oxadiazol-5-yl)-[1,1'-biphenyl]-3-yl)pyridin-3-amine (3af)

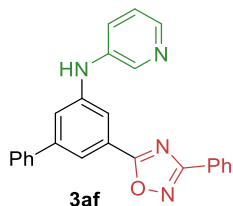

According to the **GP B**; from 1,3-diketone **1a** (0.5 mmol), amine **2f** (0.75 mmol), AcOH (30 mol%), molecular sieves 3 Å (300 mg) and acetone (2 mL); reaction time 6 d; purified by flash column chromatography (PhMe/EA 3:1). Beige powder, 117 mg (60%), mp 172–175 °C.  $R_f$  = 0.13 (PhMe/EtOAc 3:1).

$^1\text{H}$  NMR (400 MHz,  $\text{CDCl}_3$ )  $\delta$  8.51 (d,  $J$  = 2.7 Hz, 1H), 8.34 – 8.23 (m, 1H), 8.20 – 8.11 (m, 2H), 8.01 (d,  $J$  = 1.5 Hz, 1H), 7.83 (t,  $J$  = 1.8 Hz, 1H), 7.64 – 7.57 (m, 2H), 7.55 – 7.43 (m, 7H), 7.39 (t,  $J$  = 7.3 Hz, 1H), 7.25 (dd,  $J$  = 8.1, 4.8 Hz, 1H), 6.20 (s, 1H).  $^{13}\text{C}$  NMR (101 MHz,  $\text{CDCl}_3$ )  $\delta$  175.6, 169.2, 144.0, 143.9, 143.4, 141.4, 139.8, 139.0, 131.3, 129.1 (2C), 129.0 (2C), 128.3, 127.7 (2C), 127.3 (2C), 127.1, 126.2, 125.2, 124.1, 120.2, 120.0, 115.5. IR (mineral oil),  $\text{cm}^{-1}$ : 3233, 1613, 1584, 1562, 1497, 1465. Anal. Calcd for  $\text{C}_{25}\text{H}_{18}\text{N}_4\text{O}$ : C 76.91; H 4.65; N 14.35. Found: C 77.15; H 4.77; N 14.23.

### 5-(3-Phenyl-1,2,4-oxadiazol-5-yl)-N-(4-(trifluoromethyl)phenyl)-[1,1'-biphenyl]-3-amine (3ag)

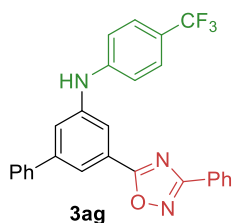

According to the **GP B**; from 1,3-diketone **1a** (0.3 mmol), amine **2g** (0.45 mmol), AcOH (30 mol%), molecular sieves 3 Å (300 mg) and acetone (1 mL); reaction time 8d, flash column chromatography (hexane/EtOAc 10:1; loading in DCM). Light-yellow powder, 45 mg (33%), mp 185–187 °C.  $R_f$  = 0.78 (PhMe/EtOAc 5:1).

$^1\text{H}$  NMR (400 MHz,  $\text{CDCl}_3$ )  $\delta$  8.23 – 8.15 (m, 2H), 8.08 (s, 1H), 7.92 (s, 1H), 7.64 (d,  $J$  = 7.1 Hz, 2H), 7.59 – 7.45 (m, 8H), 7.42 (t,  $J$  = 7.3 Hz, 1H), 7.18 (d,  $J$  = 8.3 Hz, 2H), 6.16 (s, 1H).  $^{13}\text{C}$  NMR (101 MHz,  $\text{CDCl}_3$ )  $\delta$  175.6, 169.3, 145.8, 144.0, 143.0, 139.6, 131.4, 129.2 (2C), 129.0 (2C), 128.4, 127.7 (2C), 127.3 (2C), 127.1 (q,  $J$  = 3.9 Hz), 127.1, 126.2, 124.6 (q,  $J$  = 270.9 Hz), 123.3 (2C, q,  $J$  = 32.8 Hz), 121.7, 121.0, 117.1, 116.7 (2C).  $^{19}\text{F}$  NMR (377 MHz,  $\text{CDCl}_3$ )  $\delta$  -64.75. IR (mineral oil),  $\text{cm}^{-1}$ : 3318, 1594, 1560, 1523, 1501, 1461. Anal. Calcd for  $\text{C}_{27}\text{H}_{18}\text{F}_3\text{N}_3\text{O}$ : C 70.89; H 3.97; N 9.19. Found: C 71.17; H 4.16; N 9.37.

### *N*-Allyl-5-(5-phenyl-1,3,4-oxadiazol-2-yl)-[1,1'-biphenyl]-3-amine (**3ai**)

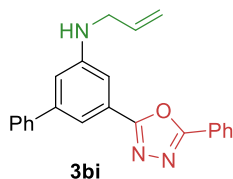

According to the **GP A**; from 1,3-diketone **1b** (0.5 mmol), amine **2i** (0.75 mmol), acetone (2 mL) and  $\text{CHCl}_3$  (1 mL); reaction time 1d, recrystallized from EtOH. Light-yellow powder, 124 mg (70%), mp 161–163 °C,  $R_f$  = 0.46 (PhMe/EtOAc 5:1).

**$^1\text{H}$  NMR** (400 MHz,  $\text{CDCl}_3$ )  $\delta$  8.20 – 8.10 (m, 2H), 7.72 – 7.67 (m, 1H), 7.67 – 7.62 (m, 2H), 7.59 – 7.50 (m, 3H), 7.50 – 7.43 (m, 2H), 7.43 – 7.34 (m, 2H), 7.02 (dd,  $J$  = 2.3, 1.6 Hz, 1H), 6.02 (ddt,  $J$  = 17.2, 10.5, 5.3 Hz, 1H), 5.37 (dd,  $J$  = 17.2, 1.6 Hz, 1H), 5.24 (dd,  $J$  = 10.3, 1.5 Hz, 1H), 4.54 (s, 1H), 3.93 (dt,  $J$  = 5.4, 1.6 Hz, 2H).  **$^{13}\text{C}$  NMR** (101 MHz,  $\text{CDCl}_3$ )  $\delta$  165.2, 164.7, 148.7, 143.5, 140.7, 134.8, 131.8, 129.2 (2C), 129.0 (2C), 128.0, 127.3 (2C), 127.1 (2C), 125.3, 124.3, 117.1, 115.5, 115.4, 110.2, 46.8. IR (mineral oil),  $\text{cm}^{-1}$ : 3333, 1604, 1550, 1529, 1463. Anal. Calcd for  $\text{C}_{23}\text{H}_{19}\text{N}_3\text{O}$ : C 78.16; H 5.42; N 11.89. Found: C 78.56; H 5.51; N 12.02.

### *N*-(2,2-Dimethoxyethyl)-5-(5-phenyl-1,3,4-oxadiazol-2-yl)-[1,1'-biphenyl]-3-amine (**3aj**)

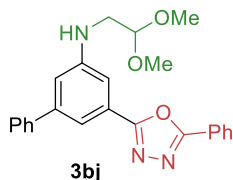

According to the **GP A**; from 1,3-diketone **1b** (0.5 mmol), amine **2j** (0.75 mmol), acetone (2 mL) and  $\text{CHCl}_3$  (1 mL); reaction time 12 h, recrystallized from EtOH. Off-white powder, 162 mg (80%), mp 169–171 °C.  $R_f$  = 0.14 (PhMe/EtOAc 5:1).

**$^1\text{H}$  NMR** (400 MHz,  $\text{CDCl}_3$ )  $\delta$  8.24 – 8.09 (m, 2H), 7.69 (t,  $J$  = 1.5 Hz, 1H), 7.66 – 7.61 (m, 2H), 7.53 (qd,  $J$  = 4.7, 1.5 Hz, 3H), 7.46 (t,  $J$  = 7.3 Hz, 2H), 7.41 – 7.33 (m, 2H), 7.07 – 6.93 (m, 1H), 4.63 (t,  $J$  = 5.4 Hz, 1H), 4.23 (s, 1H), 3.46 (s, 6H), 3.41 (d,  $J$  = 5.4 Hz, 2H).  **$^{13}\text{C}$  NMR** (101 MHz,  $\text{CDCl}_3$ )  $\delta$  165.1, 164.7, 148.9, 143.5, 140.7, 131.7, 129.2 (2C), 128.9 (2C), 127.9, 127.3 (2C), 127.1 (2C), 125.4, 124.3, 115.4, 115.3, 109.8, 102.7, 54.1 (2C), 45.6. IR (mineral oil),  $\text{cm}^{-1}$ : 3402, 1598, 1576, 1540, 1513, 1460. Anal. Calcd for  $\text{C}_{24}\text{H}_{23}\text{N}_3\text{O}_3$ : C 71.80; H 5.77; N 10.47. Found: C 72.17; H 5.83; N 10.31.

### *N*-(2,6-Diisopropylphenyl)-5-(3-phenyl-1,2,4-oxadiazol-5-yl)-[1,1'-biphenyl]-3-amine (**3ah**)

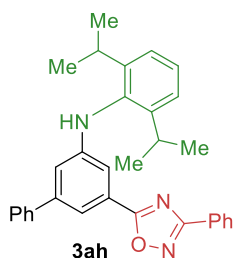

According to the **GP B**; from 1,3-diketone **1a** (0.3 mmol), amine **2h** (0.45 mmol), AcOH (30 mol %), molecular sieves 3 Å (200 mg) and acetone (1 mL); reaction time 6 d, recrystallized from MTBE/ $\text{Me}_2\text{CO}$ . Beige powder, 75 mg (53%), mp 189–190 °C.  $R_f$  = 0.39 (PhMe/Hexane 1:2).

**$^1\text{H}$  NMR** (400 MHz,  $\text{CDCl}_3$ )  $\delta$  8.25 – 8.12 (m, 2H), 7.82 (t,  $J$  = 1.5 Hz, 1H), 7.64 – 7.55 (m, 2H), 7.51 (qd,  $J$  = 4.3, 1.5 Hz, 3H), 7.44 (t,  $J$  = 7.4 Hz, 2H), 7.40 – 7.32 (m, 3H), 7.31 – 7.23 (m, 2H), 6.87 (s, 1H), 5.46 (s, 1H), 3.27 (hept,  $J$  = 6.9 Hz, 2H), 1.21 (d,  $J$  = 6.9 Hz, 12H).  **$^{13}\text{C}$  NMR** (101 MHz,  $\text{CDCl}_3$ )  $\delta$  176.3, 169.1, 149.3, 147.7 (2C), 143.6, 140.5, 134.3, 131.2, 129.0 (2C), 128.9 (2C), 128.1, 128.0, 127.7 (2C), 127.33, 127.31 (2C), 125.8, 124.3 (2C), 116.8, 115.5, 111.3, 28.6 (2C), 24.0 (4C). IR (mineral oil),  $\text{cm}^{-1}$ : 3322, 1614, 1583, 1562, 1460. Anal. Calcd for  $\text{C}_{32}\text{H}_{31}\text{N}_3\text{O}$ : C 81.15; H 6.60; N 8.87. Found: C 81.27; H 6.83; N 8.94.

**3-(3-Fluoro-4-morpholinophenyl)-5-(((5-(3-phenyl-1,2,4-oxadiazol-5-yl)-[1,1'-biphenyl]-3-yl)amino)methyl)oxazolidin-2-one (3ak)**

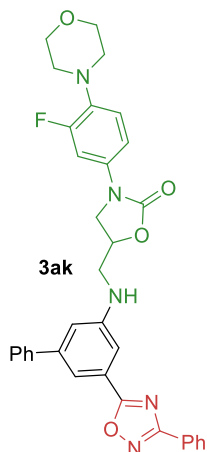

According to the **GP A**; from 1,3-diketone **1a** (0.2 mmol), amine **2k** (0.2 mmol) and acetone (1 mL); reaction time 19 h, recrystallized from EtOH. Off-white powder, 100 mg (85%), mp 207–210 °C,  $R_f$  = 0.15 (PhMe/EtOAc 5:1).

**$^1\text{H}$  NMR** (400 MHz, DMSO- $d_6$ )  $\delta$  8.17 – 8.05 (m, 2H), 7.78 – 7.67 (m, 2H), 7.65 – 7.55 (m, 4H), 7.55 – 7.47 (m, 4H), 7.47 – 7.38 (m, 1H), 7.28 (t,  $J$  = 2.0 Hz, 1H), 7.24 – 7.16 (m, 1H), 7.04 (t,  $J$  = 9.3 Hz, 1H), 6.56 (t,  $J$  = 6.1 Hz, 1H), 4.94 (dtd,  $J$  = 9.0, 6.2, 4.3 Hz, 1H), 4.18 (t,  $J$  = 8.9 Hz, 1H), 3.86 (dd,  $J$  = 9.1, 6.4 Hz, 1H), 3.78 – 3.70 (m, 4H), 3.69 – 3.54 (m, 2H), 3.01 – 2.89 (m, 4H).  **$^{13}\text{C}$  NMR** (101 MHz, DMSO- $d_6$ )  $\delta$  175.9, 168.1, 154.5 (d,  $J$  = 243.6 Hz), 154.0, 149.7, 142.3, 139.6, 135.4 (d,  $J$  = 8.8 Hz), 133.4 (d,  $J$  = 10.7 Hz), 131.5, 129.1 (2C), 128.8 (2C), 127.8, 127.0 (2C), 126.7 (2C), 126.2, 124.4, 119.1 (d,  $J$  = 4.2 Hz), 114.6, 114.0 (d,  $J$  = 3.0 Hz), 113.9, 110.3, 106.6 (d,  $J$  = 26.1 Hz), 71.6, 66.0 (2C), 50.6 (d,  $J$  = 3.0 Hz, 2C), 47.4, 45.6.  **$^{19}\text{F}$  NMR** (377 MHz, DMSO- $d_6$ )  $\delta$  -123.59. IR (mineral oil),  $\text{cm}^{-1}$ : 3416, 1732, 1607, 1559, 1517, 1460. Anal. Calcd for  $\text{C}_{34}\text{H}_{30}\text{FN}_5\text{O}_4$ : C 69.02; H 5.11; N 11.84. Found: C 69.36; H 5.21; N 11.67.

## Crystal structure determination

The unit cell parameters and the X-ray diffraction intensities were measured on a Xcalibur Ruby diffractometer. The empirical absorption correction was introduced by multi-scan method using SCALE3 ABSPACK algorithm [9]. Using the Olex2 [10], the structures were solved with the SHELXS [11] or SHELXD [11] programs and refined by the full-matrix least-squares method in the anisotropic approximation for all non-hydrogen atoms with the SHELXL program [12]. Hydrogen atoms bound to carbon were positioned geometrically and refined using a riding model. The hydrogen atoms of NH and OH groups were refined independently with isotropic displacement parameters.

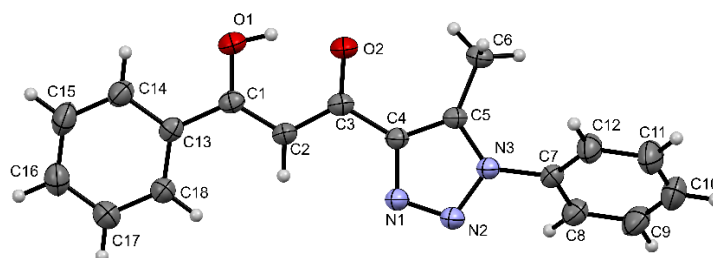

**Figure S1.** Molecular structure of compound **1g** showing 30% probability amplitude displacement ellipsoids.

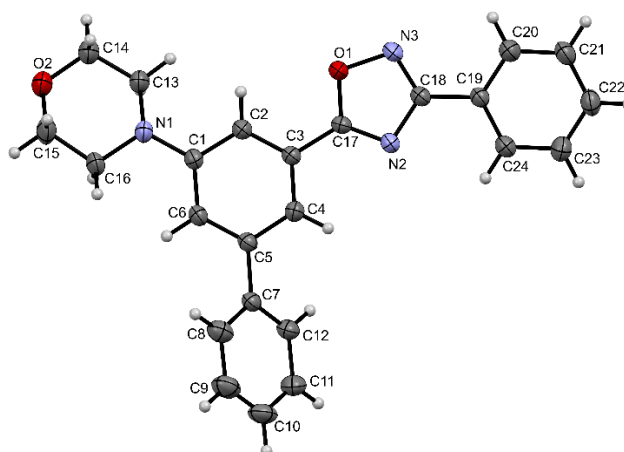

**Figure S2.** Molecular structure of compound **3ab** showing 30% probability amplitude displacement ellipsoids.

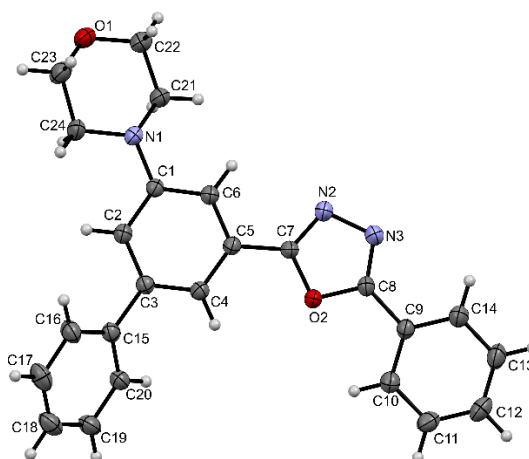

**Figure S3.** Molecular structure of compound **3bb** showing 30% probability amplitude displacement ellipsoids.

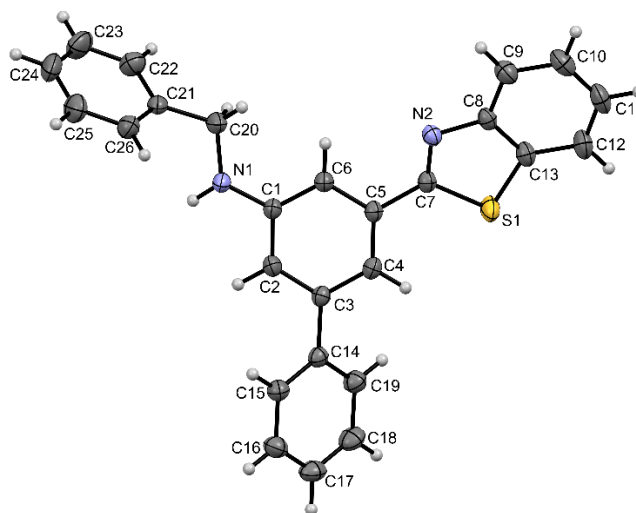

**Figure S4.** Molecular structure of compound **3ca** showing 30% probability amplitude displacement ellipsoids.

**Table S1.** Crystal data and structure refinement for compounds **1g**, **3ab**, **3bb**, **3ca**.

| Compound                                | <b>1g</b>                                                     | <b>3ab</b>                                                    | <b>3bb</b>                                                    | <b>3ca</b>                                       |
|-----------------------------------------|---------------------------------------------------------------|---------------------------------------------------------------|---------------------------------------------------------------|--------------------------------------------------|
| <b>CCDC</b>                             | 2356152                                                       | 2356151                                                       | 2356154                                                       | 2356153                                          |
| Empirical formula                       | C <sub>18</sub> H <sub>15</sub> N <sub>3</sub> O <sub>2</sub> | C <sub>24</sub> H <sub>21</sub> N <sub>3</sub> O <sub>2</sub> | C <sub>24</sub> H <sub>21</sub> N <sub>3</sub> O <sub>2</sub> | C <sub>26</sub> H <sub>20</sub> N <sub>2</sub> S |
| Formula weight                          | 305.33                                                        | 383.44                                                        | 383.44                                                        | 392.50                                           |
| Temperature, K                          | 295(2)                                                        | 295(2)                                                        | 295(2)                                                        | 295(2)                                           |
| Crystal system                          | monoclinic                                                    | monoclinic                                                    | monoclinic                                                    | orthorhombic                                     |
| Space group                             | P2 <sub>1</sub> /c                                            | P2 <sub>1</sub> /n                                            | P2 <sub>1</sub> /n                                            | Pbca                                             |
| a, Å                                    | 6.513(2)                                                      | 6.6892(16)                                                    | 6.6905(12)                                                    | 8.146(2)                                         |
| b, Å                                    | 8.256(3)                                                      | 10.681(3)                                                     | 10.677(2)                                                     | 19.701(5)                                        |
| c, Å                                    | 29.053(10)                                                    | 27.077(9)                                                     | 27.214(6)                                                     | 25.178(5)                                        |
| α, °                                    | 90                                                            | 90                                                            | 90                                                            | 90                                               |
| β, °                                    | 92.13(3)                                                      | 89.85(2)                                                      | 90.41(2)                                                      | 90                                               |
| γ, °                                    | 90                                                            | 90                                                            | 90                                                            | 90                                               |
| Volume, Å <sup>3</sup>                  | 1561.0(10)                                                    | 1934.5(10)                                                    | 1944.0(7)                                                     | 4040.7(17)                                       |
| Z                                       | 4                                                             | 4                                                             | 4                                                             | 8                                                |
| Density (calculated), g/cm <sup>3</sup> | 1.299                                                         | 1.317                                                         | 1.310                                                         | 1.290                                            |

|                                           |                                                               |                                                               |                                                               |                                                               |
|-------------------------------------------|---------------------------------------------------------------|---------------------------------------------------------------|---------------------------------------------------------------|---------------------------------------------------------------|
| Absorption coefficient, mm <sup>-1</sup>  | 0.087                                                         | 0.085                                                         | 0.085                                                         | 0.175                                                         |
| F(000)                                    | 640.0                                                         | 808.0                                                         | 808.0                                                         | 1648.0                                                        |
| Crystal size, mm <sup>3</sup>             | 0.6 × 0.3 × 0.08                                              | 0.6 × 0.1 × 0.05                                              | 0.6 × 0.4 × 0.1                                               | 0.55 × 0.25 × 0.2                                             |
| Radiation                                 | Mo Kα (λ = 0.71073)                                           | Mo Kα (λ = 0.71073)                                           | Mo Kα (λ = 0.71073)                                           | Mo Kα (λ = 0.71073)                                           |
| 2θ range for data collection, °           | 5.612 to 59.062                                               | 4.858 to 59.3                                                 | 4.49 to 59.38                                                 | 5.648 to 58.772                                               |
| Index ranges                              | -9 ≤ h ≤ 6, -7 ≤ k ≤ 11, -39 ≤ l ≤ 30                         | -8 ≤ h ≤ 9, -9 ≤ k ≤ 14, -35 ≤ l ≤ 37                         | -7 ≤ h ≤ 9, -13 ≤ k ≤ 8, -37 ≤ l ≤ 24                         | -11 ≤ h ≤ 10, -26 ≤ k ≤ 23, -23 ≤ l ≤ 34                      |
| Reflections collected                     | 7464                                                          | 9348                                                          | 7421                                                          | 14590                                                         |
| Independent reflections                   | 3687 [R <sub>int</sub> = 0.0396, R <sub>sigma</sub> = 0.0632] | 4536 [R <sub>int</sub> = 0.0545, R <sub>sigma</sub> = 0.0928] | 4261 [R <sub>int</sub> = 0.0508, R <sub>sigma</sub> = 0.0682] | 4874 [R <sub>int</sub> = 0.0401, R <sub>sigma</sub> = 0.0494] |
| Data/restraints/parameters                | 3687/1/214                                                    | 4536/0/262                                                    | 4261/0/264                                                    | 4874/0/267                                                    |
| Goodness-of-fit on F <sup>2</sup>         | 1.014                                                         | 1.032                                                         | 1.095                                                         | 1.029                                                         |
| Final R indexes [I > 2σ (I)]              | R <sub>1</sub> = 0.0571, wR <sub>2</sub> = 0.1351             | R <sub>1</sub> = 0.0717, wR <sub>2</sub> = 0.1403             | R <sub>1</sub> = 0.0556, wR <sub>2</sub> = 0.1198             | R <sub>1</sub> = 0.0513, wR <sub>2</sub> = 0.1152             |
| Final R indexes [all data]                | R <sub>1</sub> = 0.1173, wR <sub>2</sub> = 0.1824             | R <sub>1</sub> = 0.1670, wR <sub>2</sub> = 0.1963             | R <sub>1</sub> = 0.0816, wR <sub>2</sub> = 0.1518             | R <sub>1</sub> = 0.0923, wR <sub>2</sub> = 0.1411             |
| Largest diff. peak/hole, eÅ <sup>-3</sup> | 0.17/-0.20                                                    | 0.17/-0.26                                                    | 0.21/-0.19                                                    | 0.16/-0.28                                                    |

## Computational details

The DFT calculations for all model structures (**Figure S5**) were carried out at the M06-2X/6-31G\* level of theory with the help of the Gaussian-09 program package [13]. No symmetry restrictions have been applied during the geometry optimization procedure. The Hessian matrices were calculated analytically for all optimized model structures to prove the location of correct minima on the potential energy surfaces. The Cartesian atomic coordinates for all model structures are presented in attached xyz-files (see Supporting Information File 2).

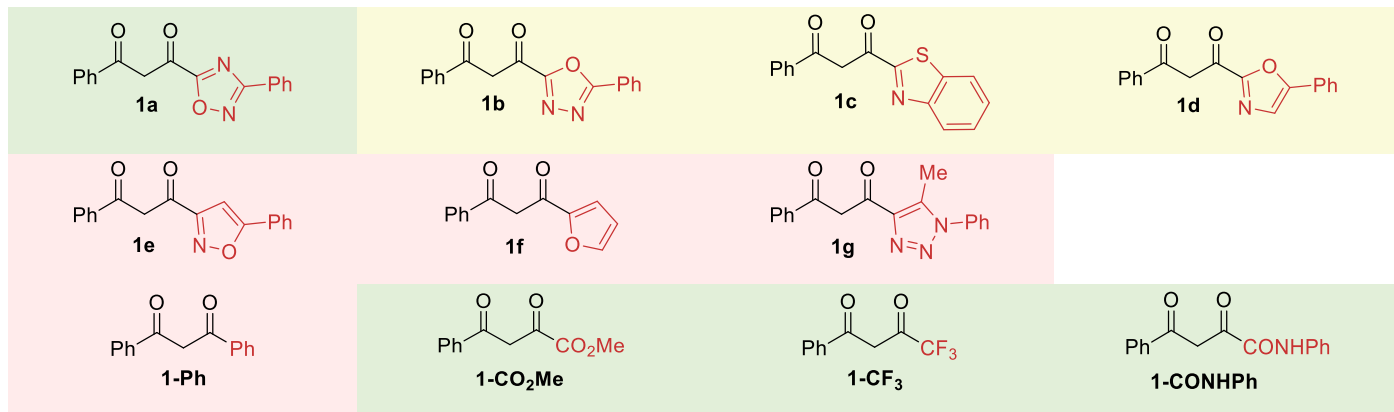

**Figure S5.** The model series of 1,3-diketones (green – successful reaction with alkyl- and arylamines; yellow – successful reaction with alkylamines; red – unsuccessful or complicated reaction with alkylamines). 1,3-Diketones 1-Ph, 1-CO<sub>2</sub>Me, 1-CF<sub>3</sub> and 1-CONHPh were studied previously [14].

Mulliken and Gasteiger (PEOE) charges were calculated for the 1,3-diketones in their keto and enol forms. Unfortunately, there is no correlation of reactivity with the Mulliken charges on the carbonyl carbon. A slightly better trend in reactivity is seen in the Gasteiger charges of the carbonyl carbon (**Table S2**). However, the Hammett constants calculated using Ertl's web-based tool [15] provide the best prediction of reactivity for these 1,3-diketones (**Figure S6**).

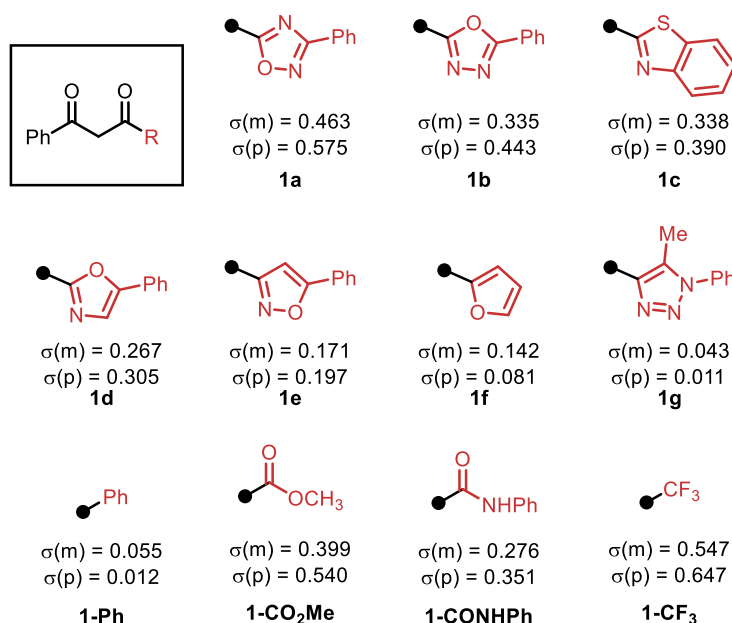

**Figure S6.** The model series of 1,3-diketones with calculated (Ertl's web-based tool) Hammett constants.



**Table S2.** The calculated charges for the 1,3-diketone model series

| 1,3-diketones                                                                                               | Charges of the enol form                                                          |          |                    |          | Charges of the keto form                                                            |          |                    |          |
|-------------------------------------------------------------------------------------------------------------|-----------------------------------------------------------------------------------|----------|--------------------|----------|-------------------------------------------------------------------------------------|----------|--------------------|----------|
|                                                                                                             | 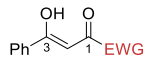 |          |                    |          |  |          |                    |          |
|                                                                                                             | C <sup>1</sup> -EWG                                                               |          | C <sup>3</sup> -Ph |          | C <sup>1</sup> -EWG                                                                 |          | C <sup>3</sup> -Ph |          |
|                                                                                                             | Gasteiger (PEOE)                                                                  | Mulliken | Gasteiger (PEOE)   | Mulliken | Gasteiger (PEOE)                                                                    | Mulliken | Gasteiger (PEOE)   | Mulliken |
| <br>1a                     | 0.23281078                                                                        | 0.397155 | 0.08253728         | 0.369021 | 0.21489088                                                                          | 0.401371 | 0.17026388         | 0.436228 |
| <br>1b                     | 0.23245502                                                                        | 0.407540 | 0.08253703         | 0.356896 | 0.21453425                                                                          | 0.447565 | 0.17026362         | 0.421719 |
| <br>1c                     | 0.21317288                                                                        | 0.429893 | 0.08247343         | 0.363714 | 0.19528561                                                                          | 0.464127 | 0.17019723         | 0.429492 |
| <br>1d                     | 0.23060343                                                                        | 0.394174 | 0.08253587         | 0.353392 | 0.21268238                                                                          | 0.436739 | 0.17026239         | 0.430439 |
| <br>1e                     | 0.20875028                                                                        | 0.426754 | 0.08245387         | 0.364520 | 0.19087076                                                                          | 0.422219 | 0.17017682         | 0.429744 |
| <br>1f                     | 0.21135056                                                                        | 0.404507 | 0.08247177         | 0.356366 | 0.19346649                                                                          | 0.430176 | 0.17019547         | 0.425726 |
| <br>1g                   | 0.20990789                                                                        | 0.434210 | 0.08245466         | 0.355750 | 0.19202673                                                                          | 0.426957 | 0.17017765         | 0.425768 |
| <br>1-Ph                 | 0.18795900                                                                        | 0.420700 | 0.08239133         | 0.363235 | 0.17011152                                                                          | 0.442541 | 0.17011152         | 0.408584 |
| <br>1-CO <sub>2</sub> Me | 0.25270809                                                                        | 0.339323 | 0.08263459         | 0.356169 | 0.23476923                                                                          | 0.412033 | 0.17033507         | 0.425854 |
| <br>1-CF <sub>3</sub>    | 0.26139441                                                                        | 0.290487 | 0.08240761         | 0.372031 | 0.24345676                                                                          | 0.364606 | 0.17010650         | 0.423194 |
| <br>1-CONHPh             | 0.24320262                                                                        | 0.364377 | 0.08257455         | 0.364627 | 0.22526640                                                                          | 0.408754 | 0.17030279         | 0.429418 |

## References:

1. Nekrasov D.D., Chizh V.G., Andreichikov Y.S., Tul'bovich G.A. *Zhurnal Organicheskoi Khimii*, 1996, 32, 761.
2. Krylova I.V., Nekrasov D.D., Andreichikov Y.S. *Khimiya Geterotsiklicheskikh Soedinenii*, **1988**, 11, 1457.
3. Kumar N.N.B., Kuznetsov D.M., Kutateladze A.G. *Org. Lett.*, **2015**, 17, 438.
4. Stepanova E.E., Krasokha M.O., Galeev A.R., Dmitriev M.V., Maslivets A.N. *Russ J Org Chem*, **2018**, 54, 1735.
5. Kalinin S., Valtari A., Ruponen M., Toropainen E., Kovalenko A., Nocentini A., Gureev M., Dar'in D., Urtti A., Supuran C.T., Krasavin M. *Bioorganic & Medicinal Chemistry*, **2019**, 27, 115086.
6. Klein E., DeBonis, S., Thiede B., Skoufias D.A., Kozielski F., Lebeau L. *Bioorganic & Medicinal Chemistry*, **2007**, 15, 6474.
7. Rao H.S.P., Muthanna N. *European Journal of Organic Chemistry*, **2015**, 1525.
8. Golobokova T.V., Proidakov A.G., Kizhnyaev V.N. *Russ J Org Chem*, **2020**, 56, 446.
9. CrysAlisPro, Agilent Technologies, Version 1.171.37.33 (release 27-03-2014 CrysAlis171 .NET).
10. Dolomanov O.V., Bourhis L.J., Gildea R.J., Howard J.A.K., Puschmann H. *J. Appl. Cryst.*, **2009**, 42, 339.
11. Sheldrick G.M. *Acta Crystallogr. Sect. A Found. Crystallogr.* **2008**, 64, 112.
12. Sheldrick G.M. *Acta Crystallogr., Sect. C: Struct. Chem.*, **2015**, 71, 3.
13. Gaussian 09, Revision C.01, M. J. Frisch, G. W. Trucks, H. B. Schlegel, G. E. Scuseria, M. A. Robb, J. R. Cheeseman, G. Scalmani, V. Barone, B. Mennucci, G. A. Petersson, H. Nakatsuji, M. Caricato, X. Li, H. P. Hratchian, A. F. Izmaylov, J. Bloino, G. Zheng, J. L. Sonnenberg, M. Hada, M. Ehara, K. Toyota, R. Fukuda, J. Hasegawa, M. Ishida, T. Nakajima, Y. Honda, O. Kitao, H. Nakai, T. Vreven, J. A. Montgomery, Jr., J. E. Peralta, F. Ogliaro, M. Bearpark, J. J. Heyd, E. Brothers, K. N. Kudin, V. N. Staroverov, T. Keith, R. Kobayashi, J. Normand, K. Raghavachari, A. Rendell, J. C. Burant, S. S. Iyengar, J. Tomasi, M. Cossi, N. Rega, J. M. Millam, M. Klene, J. E. Knox, J. B. Cross, V. Bakken, C. Adamo, J. Jaramillo, R. Gomperts, R. E. Stratmann, O. Yazyev, A. J. Austin, R. Cammi, C. Pomelli, J. W. Ochterski, R. L. Martin, K. Morokuma, V. G. Zakrzewski, G. A. Voth, P. Salvador, J. J. Dannenberg, S. Dapprich, A. D. Daniels, O. Farkas, J. B. Foresman, J. V. Ortiz, J. Cioslowski, and D. J. Fox, Gaussian, Inc., Wallingford CT, 2010.
14. Galeev, A. R.; Dmitriev, M. V.; Mokrushin, I. G.; Mashevskaya, I. V.; Maslivets, A. N.; Rubin, M. *Org. Biomol. Chem.* **2019**, 17, 10030.
15. Ertl, P. *Chemistry Methods* **2022**, 2, e202200041.

## NMR spectra

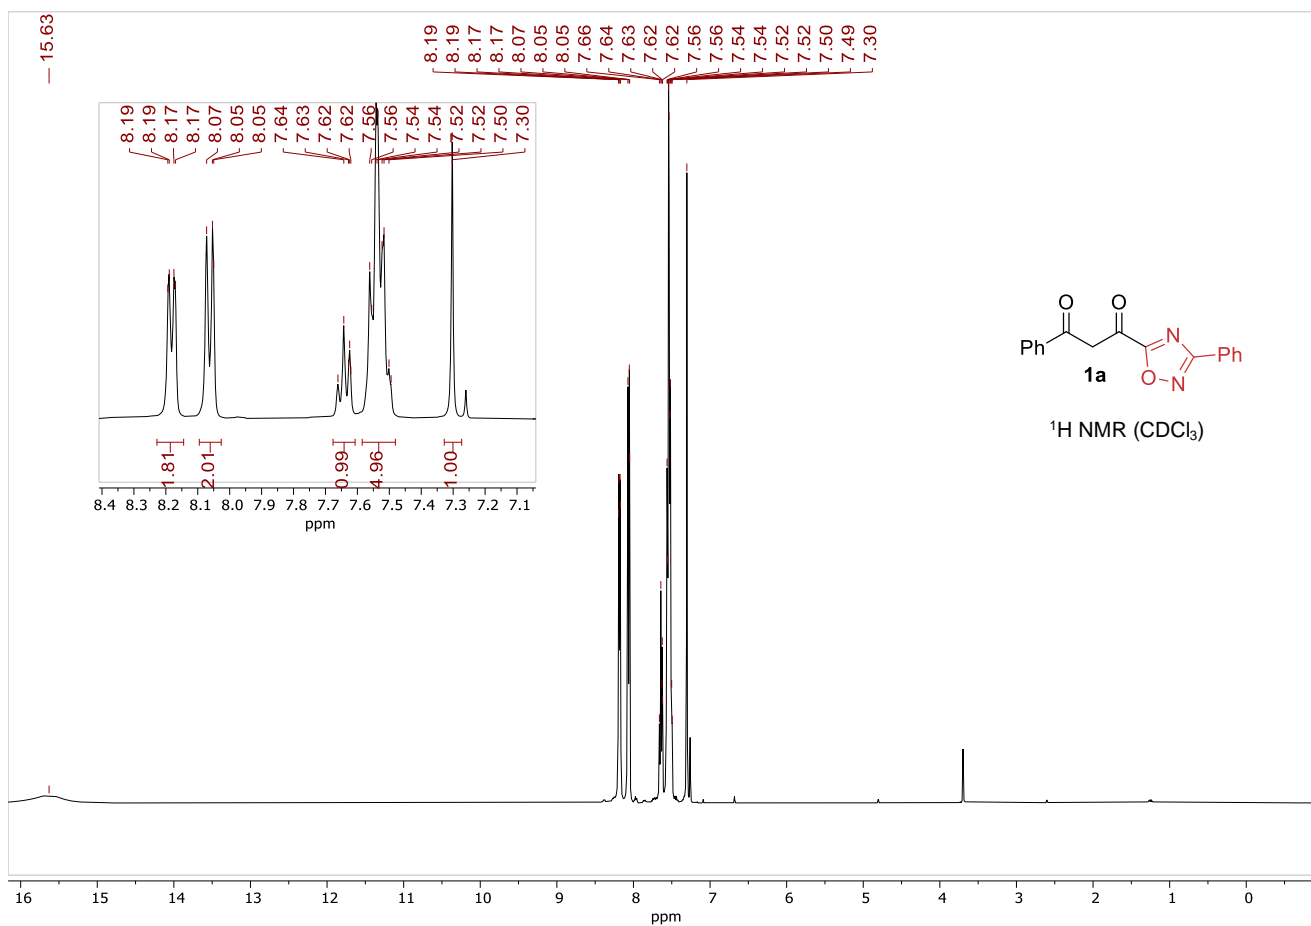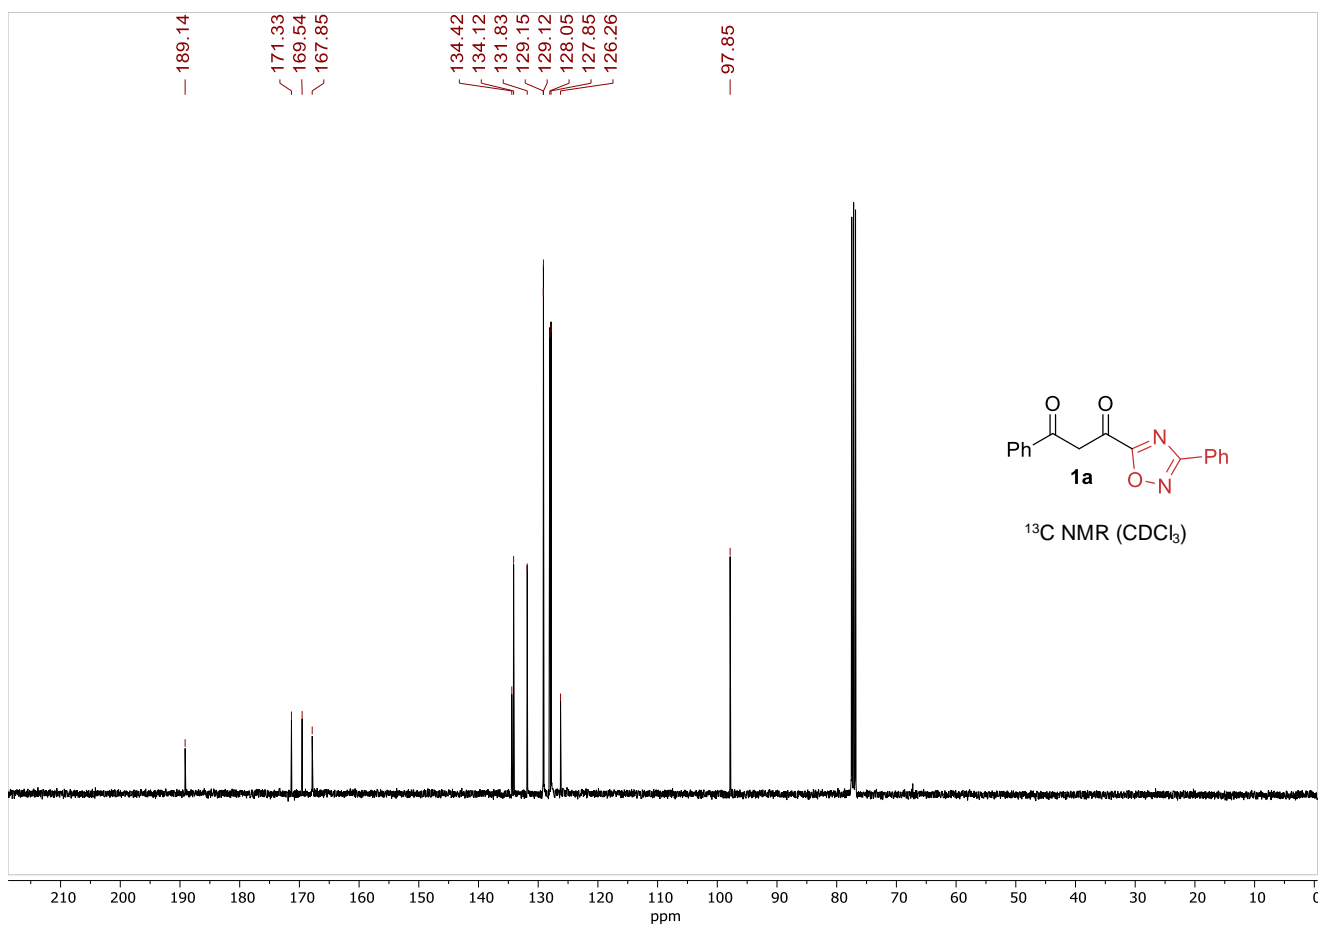

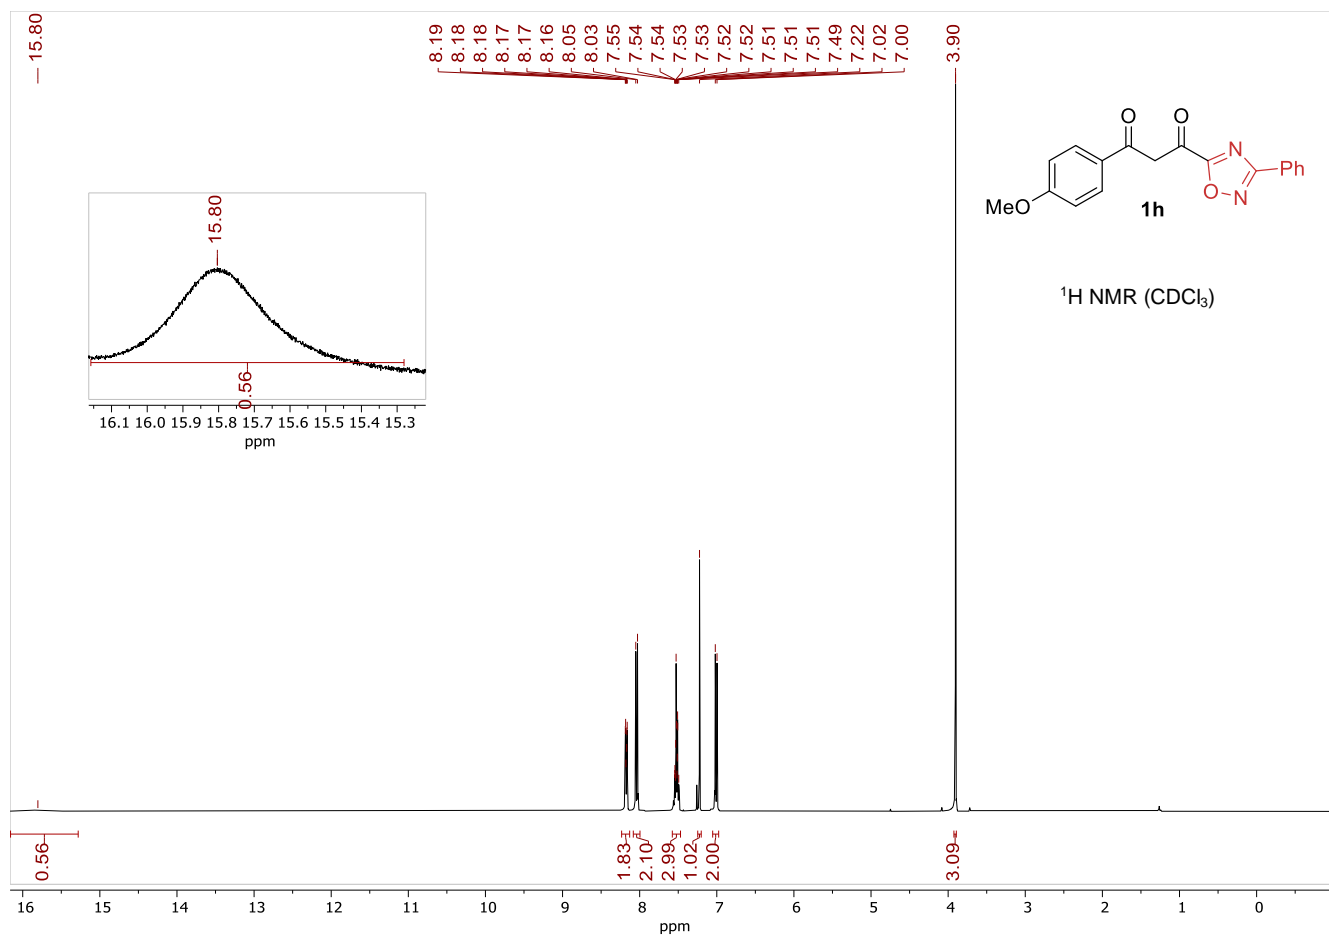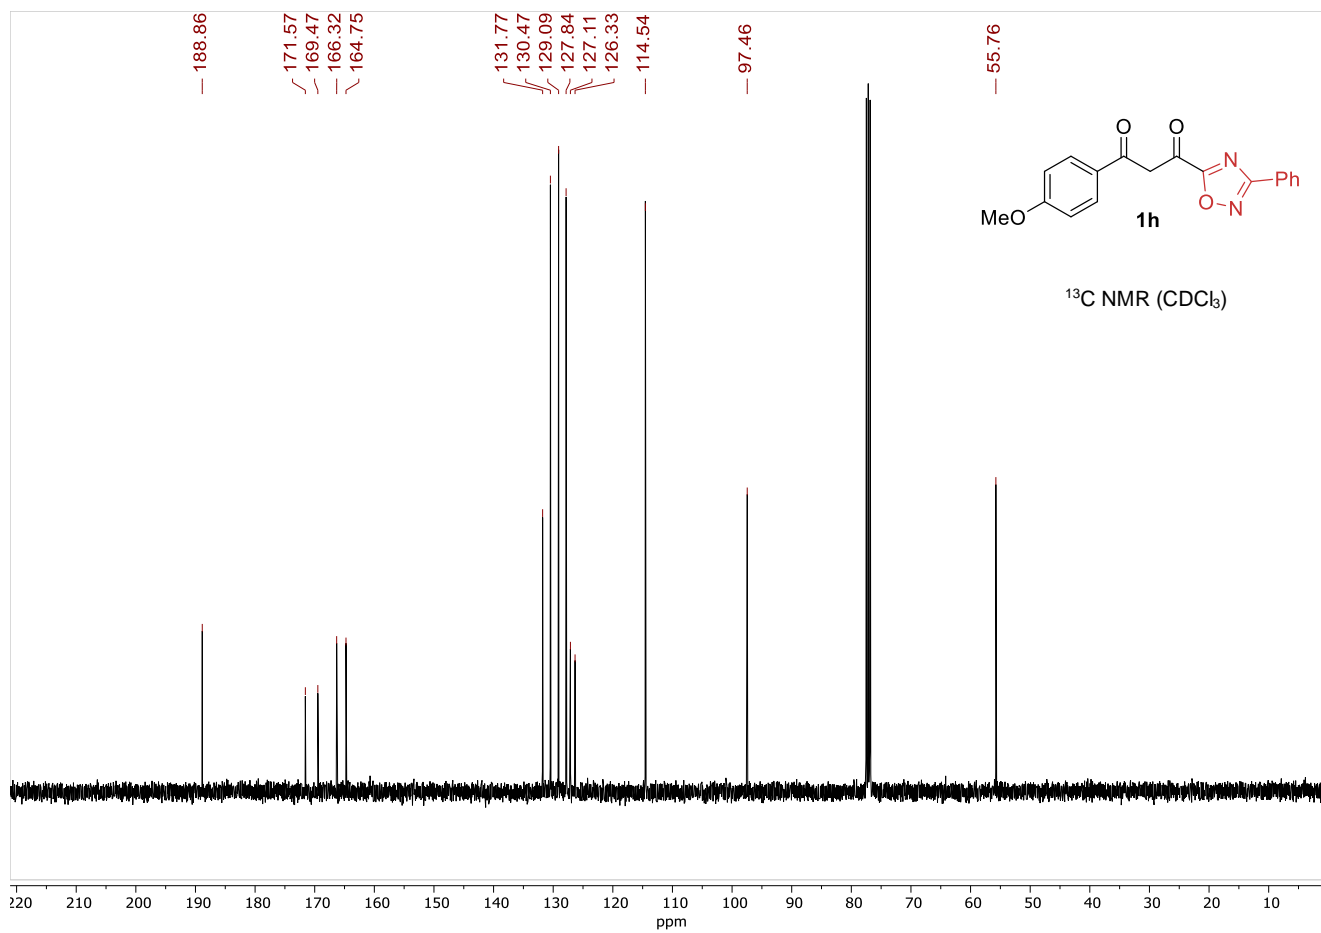

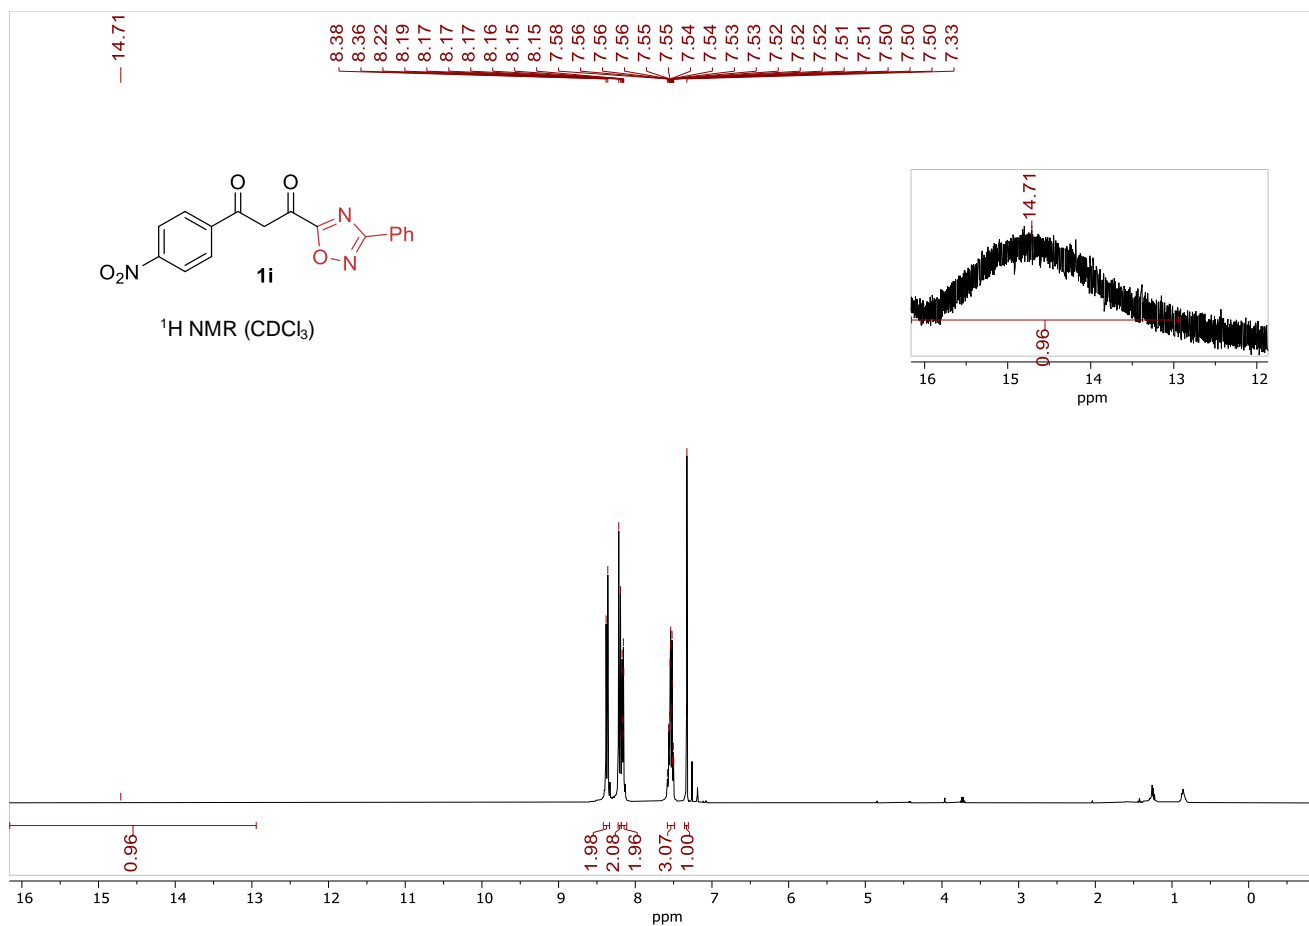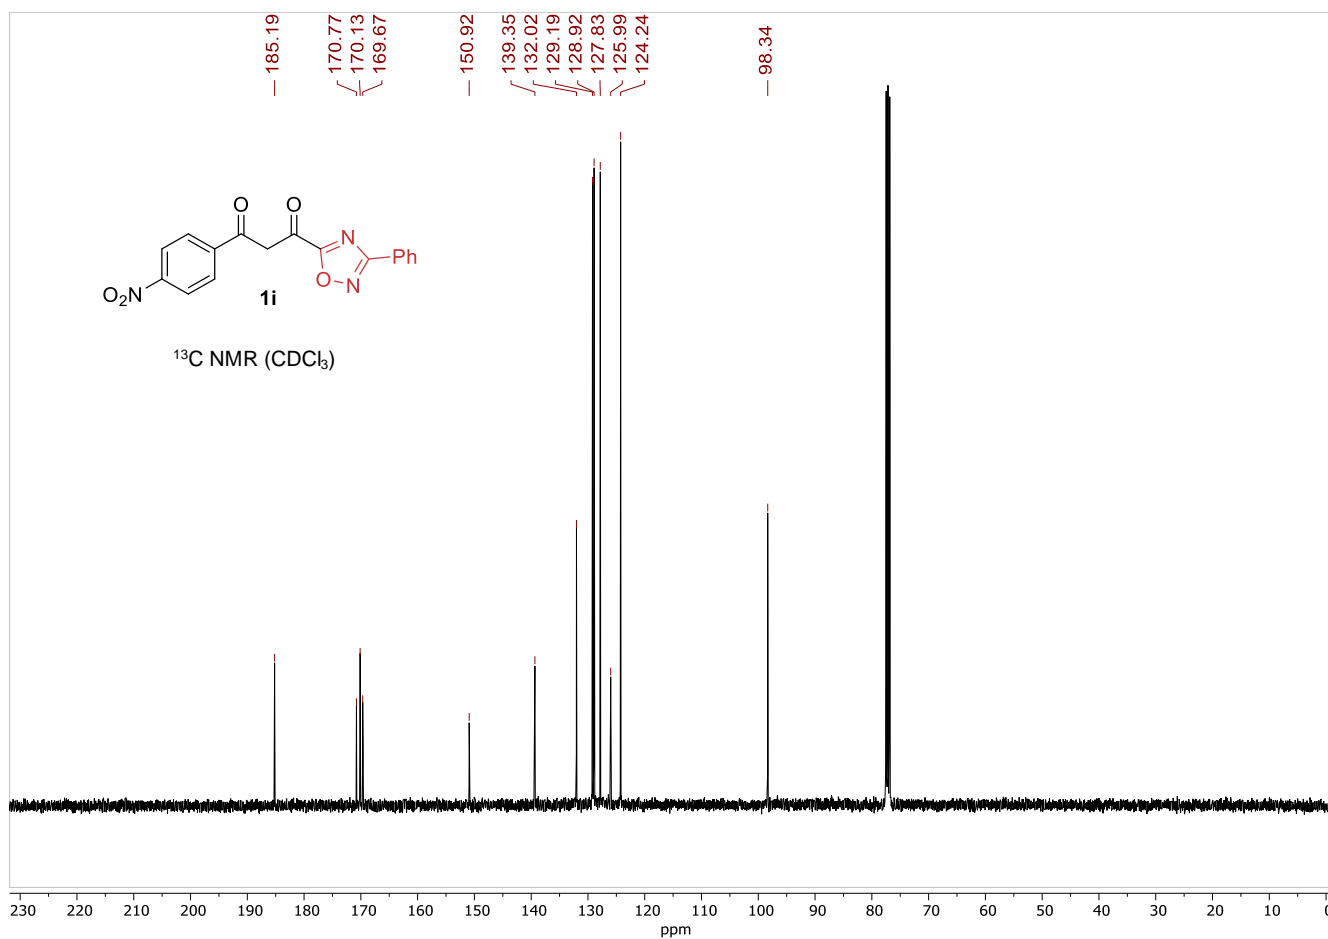

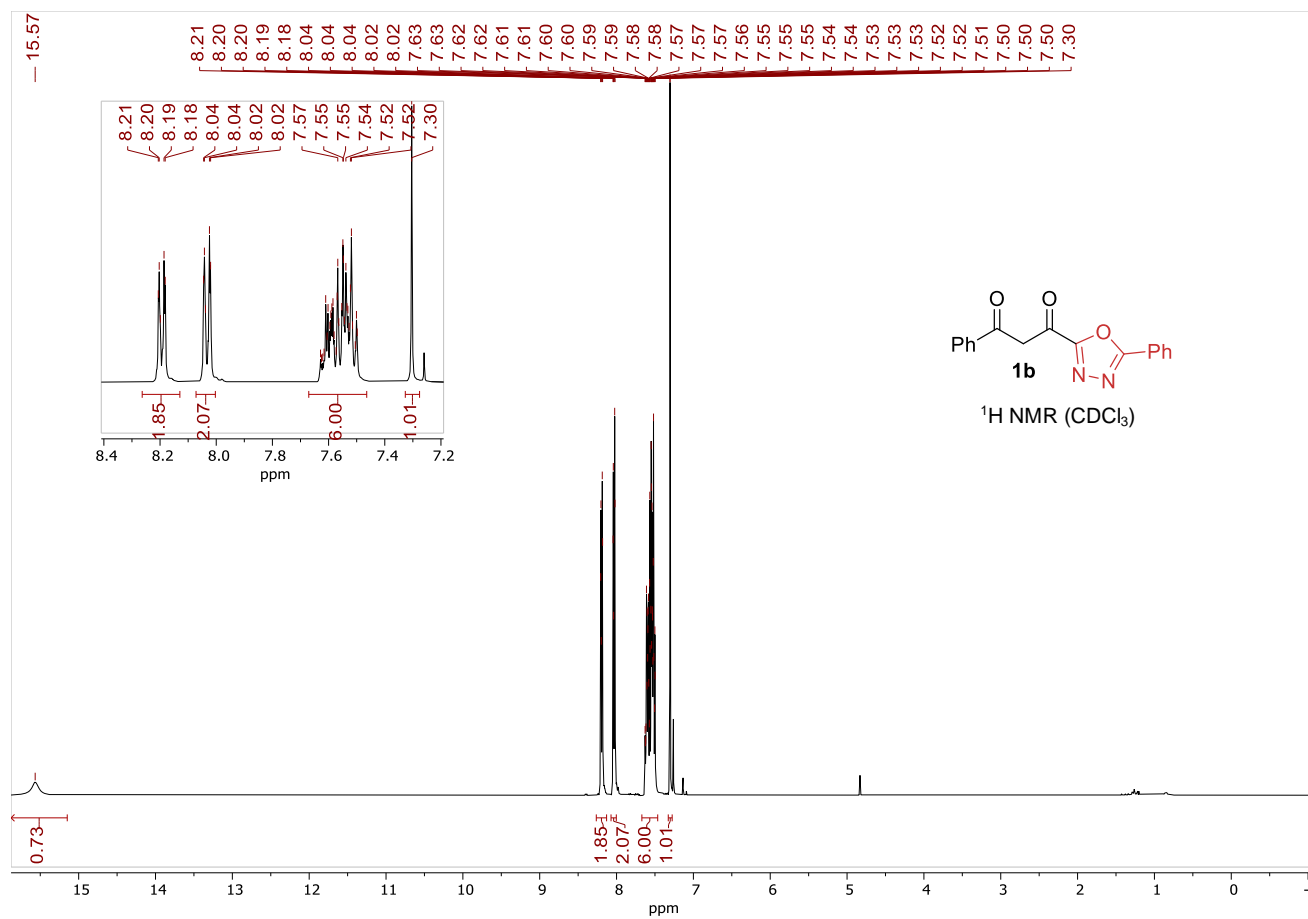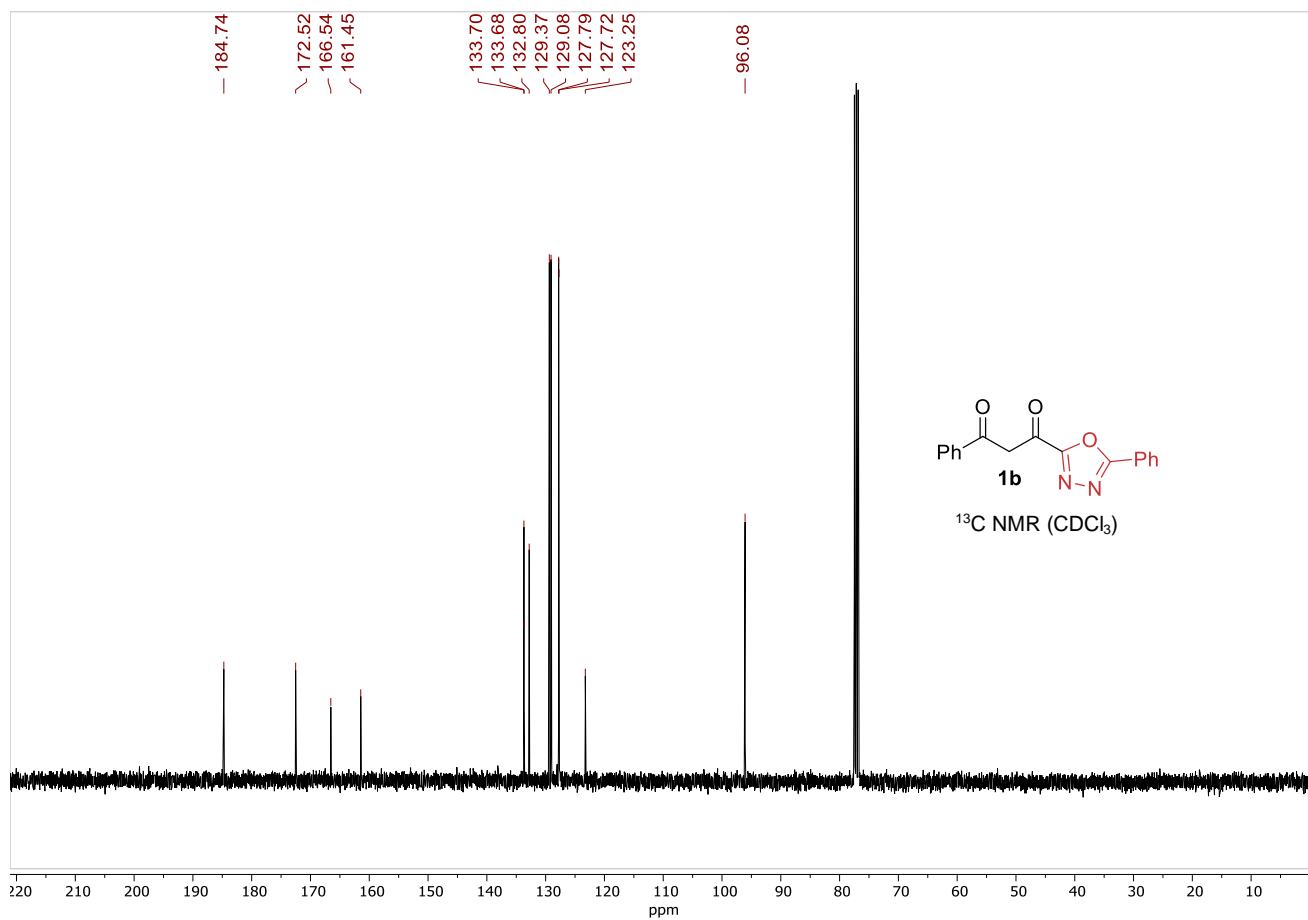

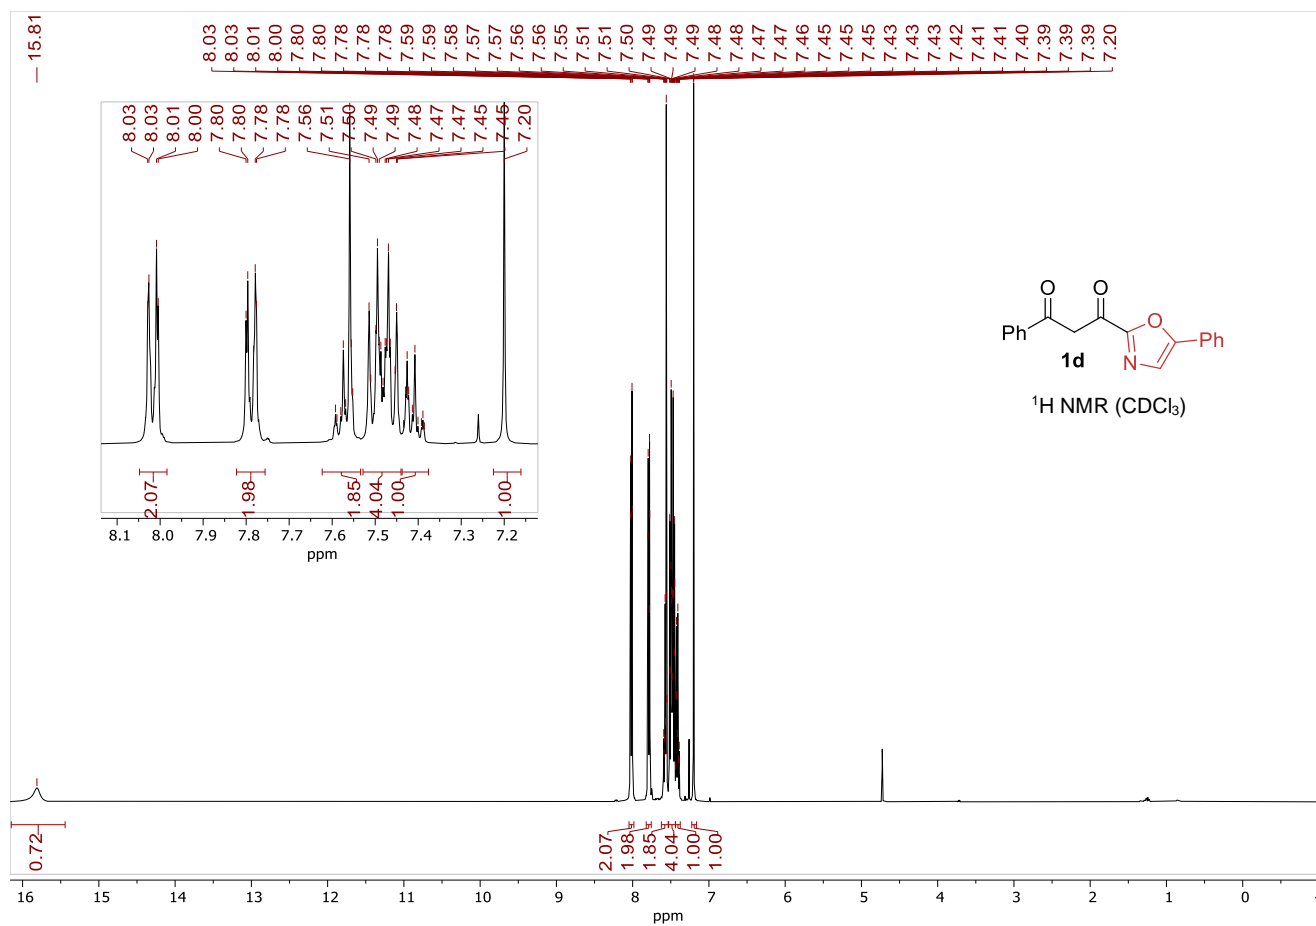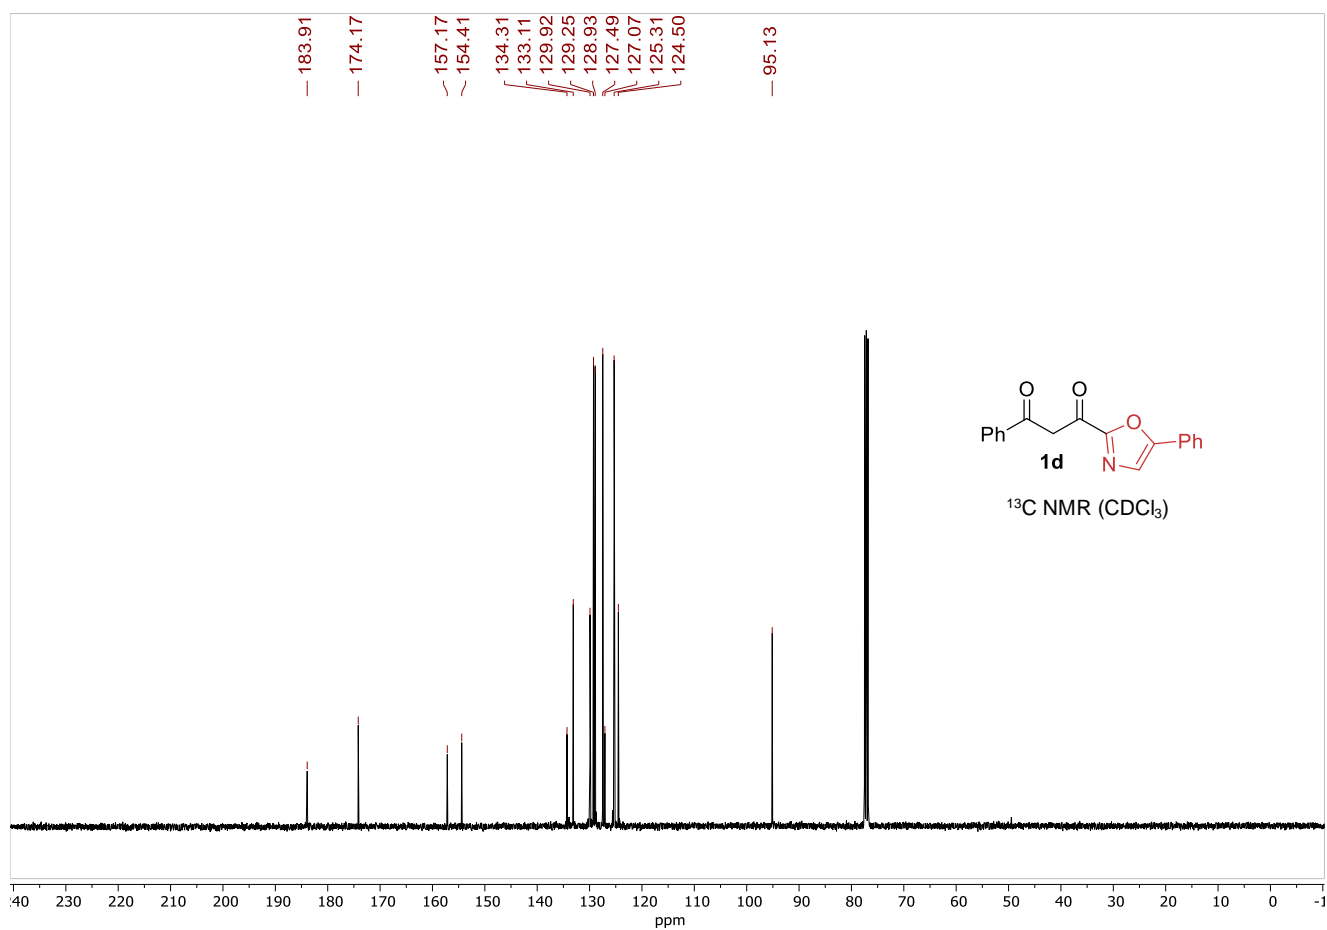

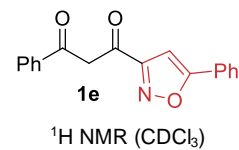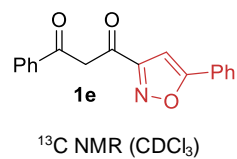



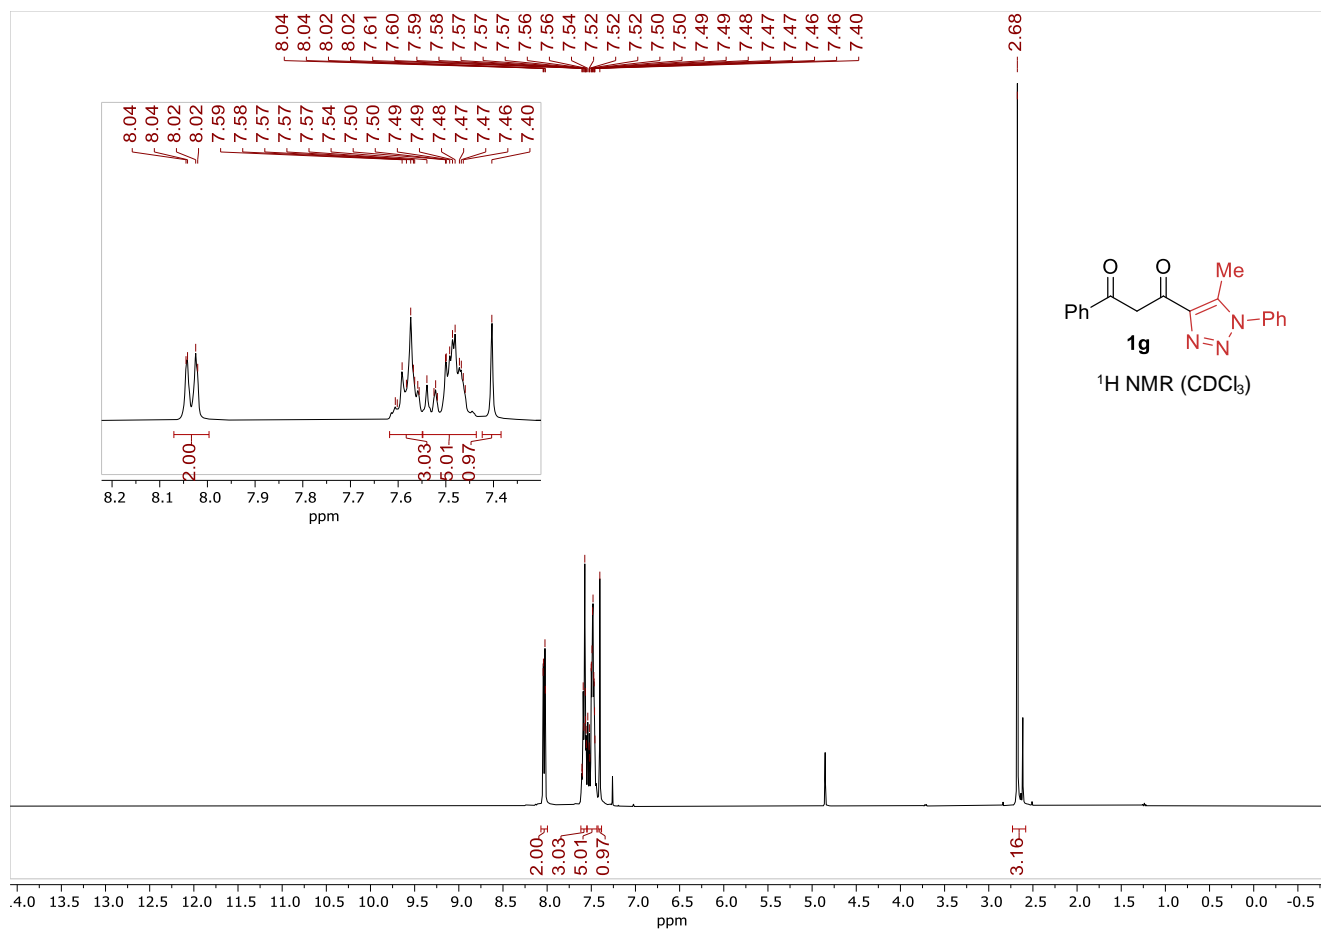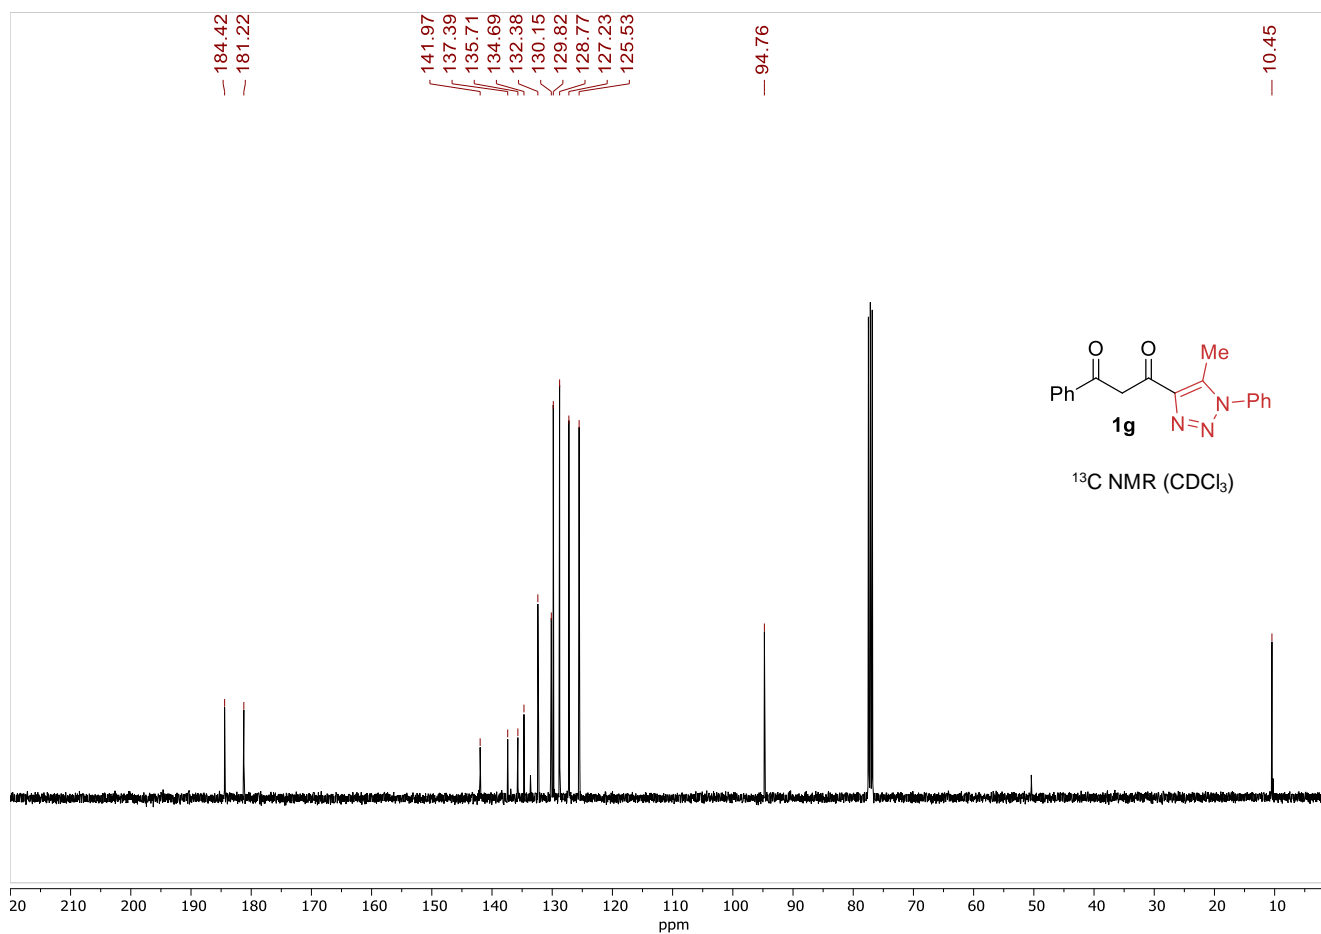

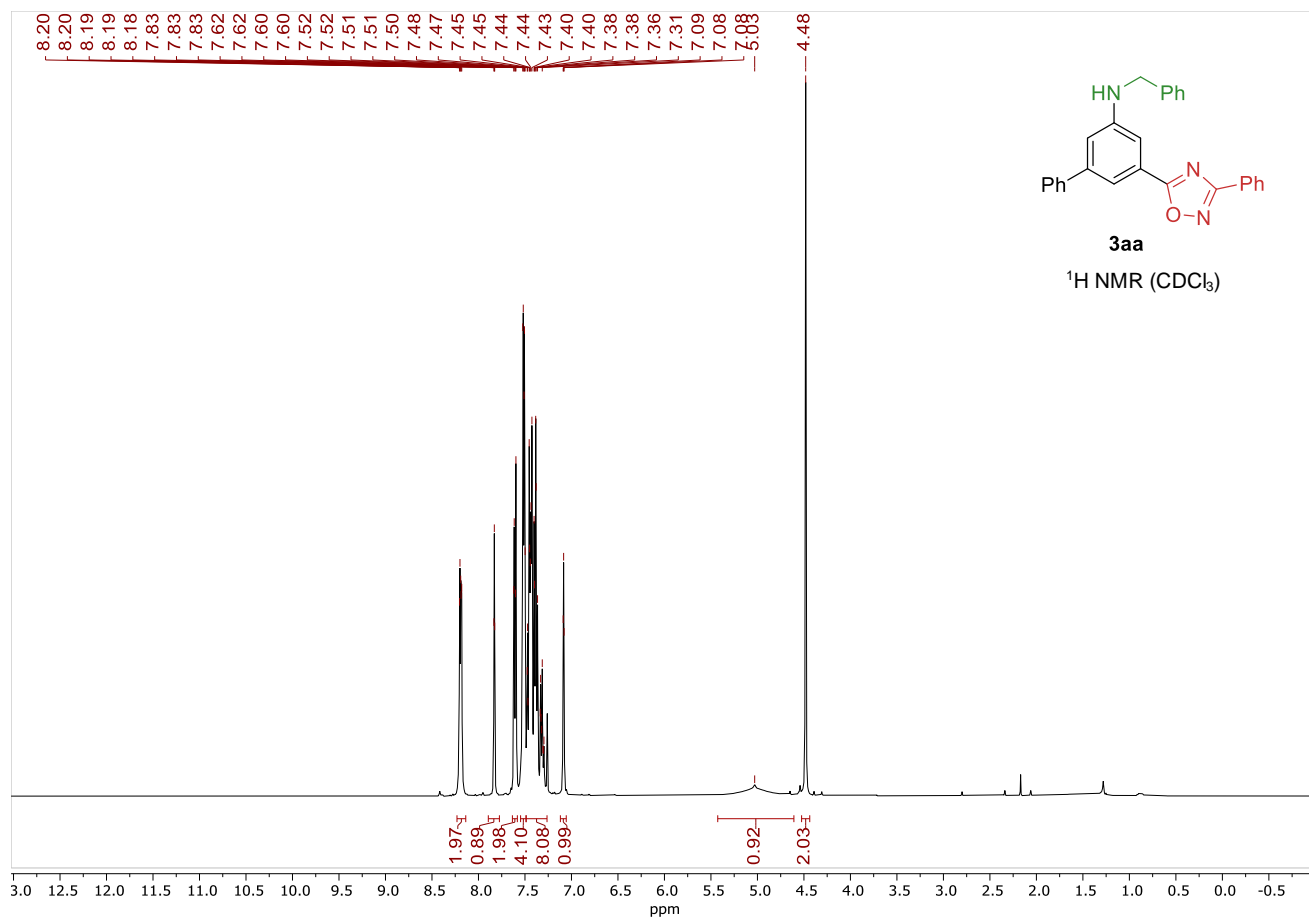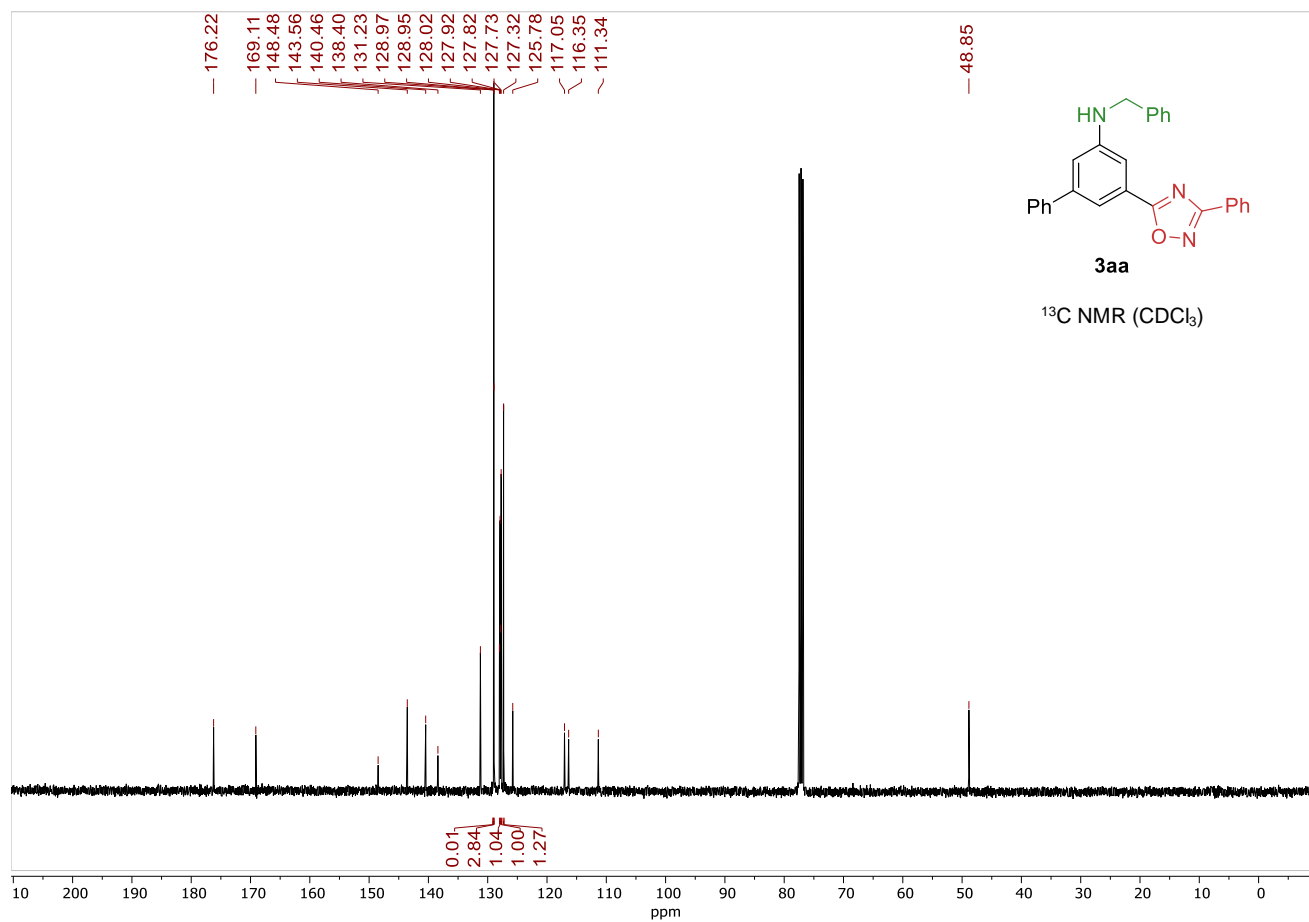

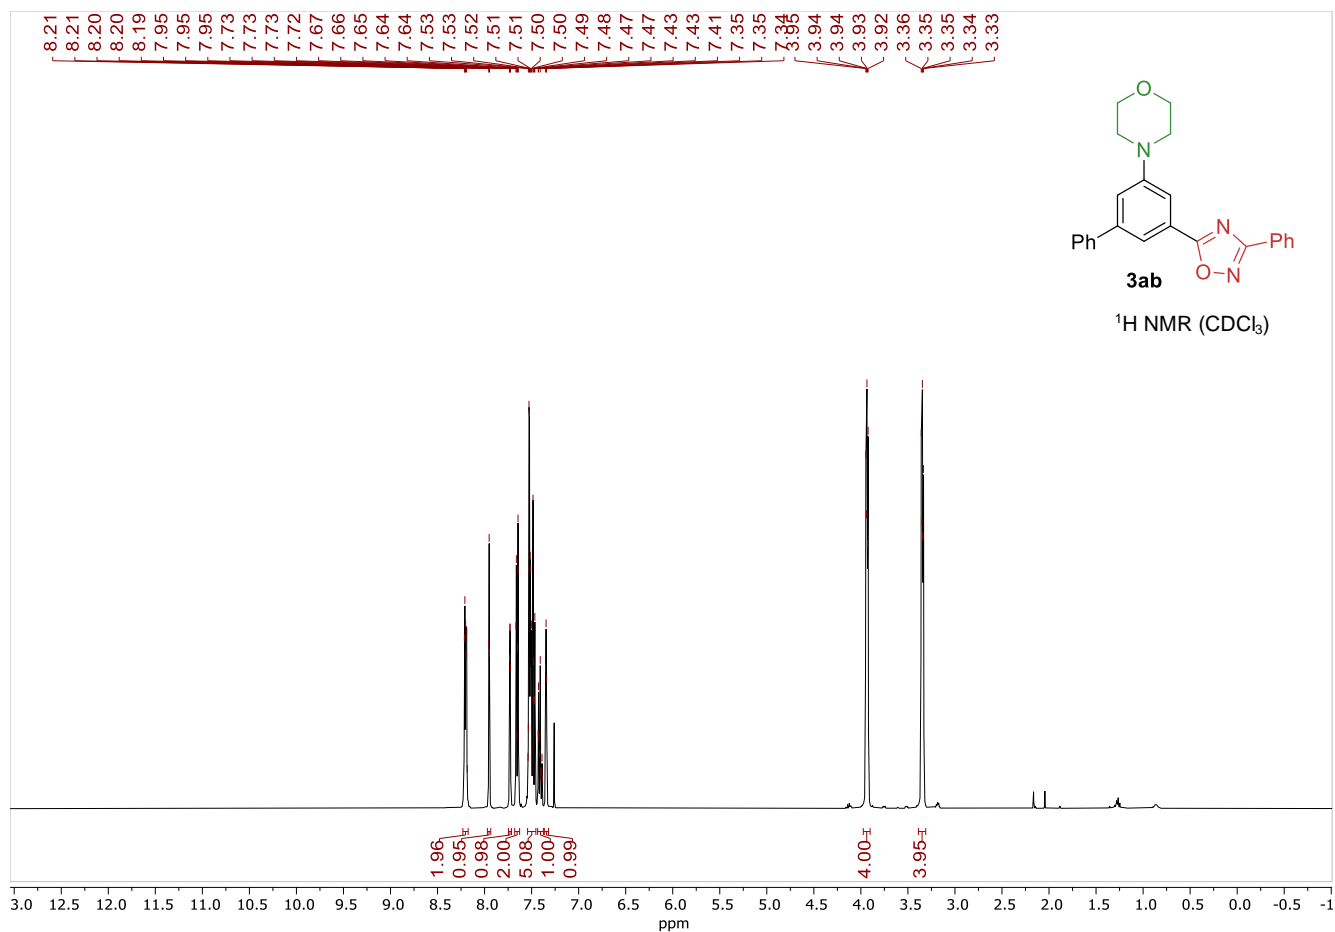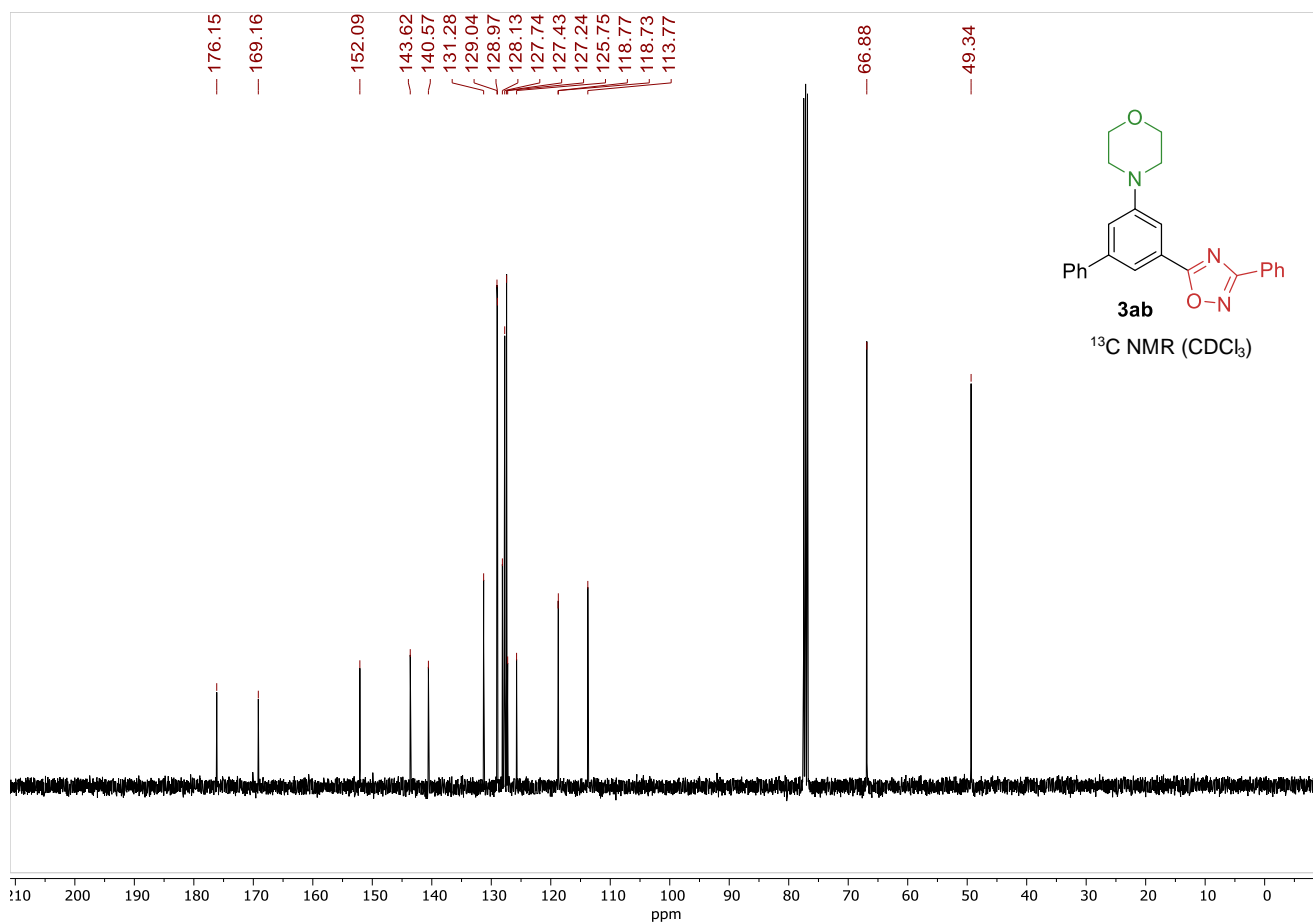

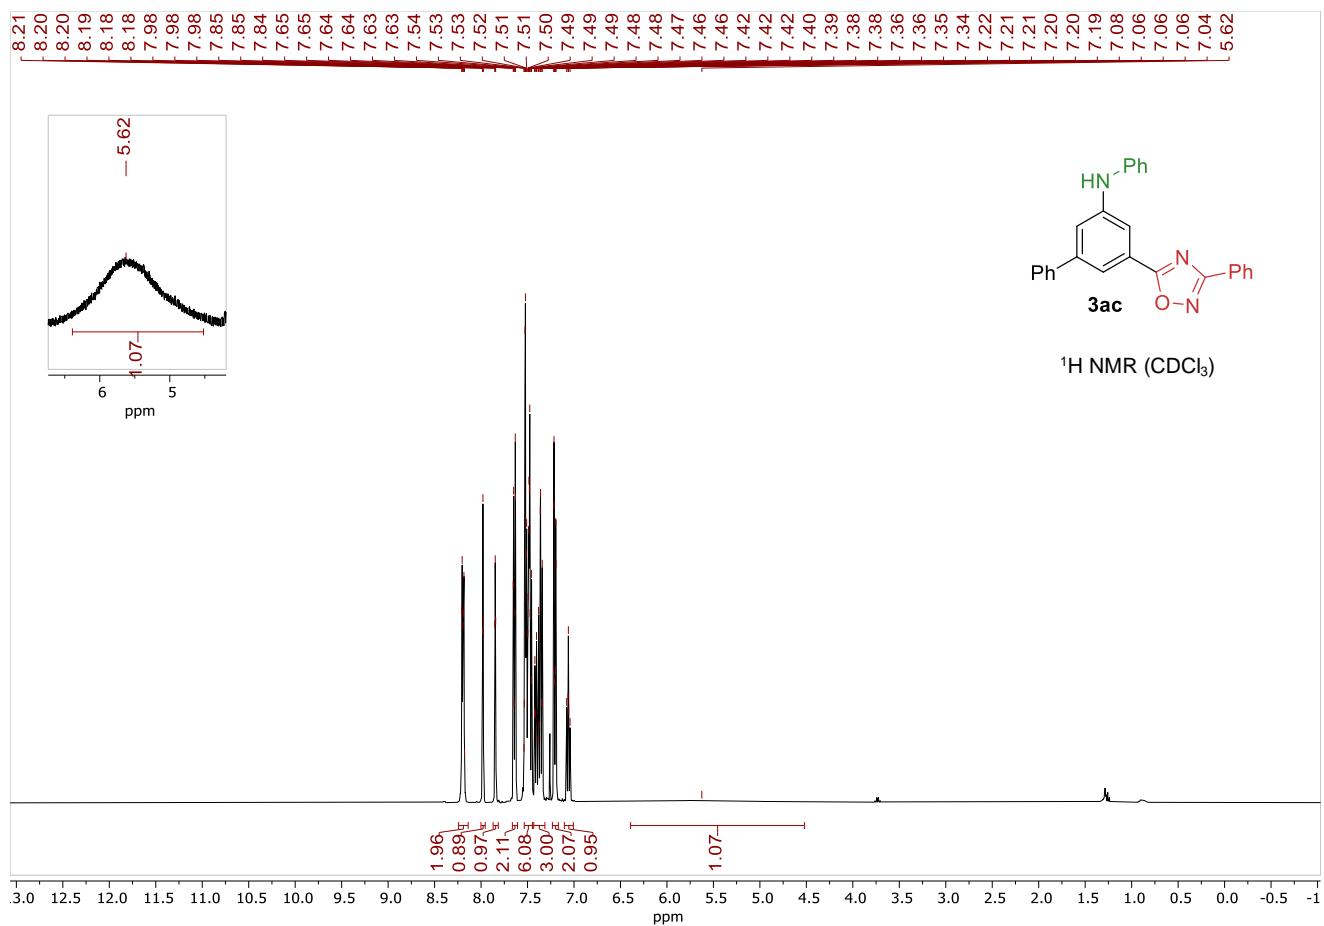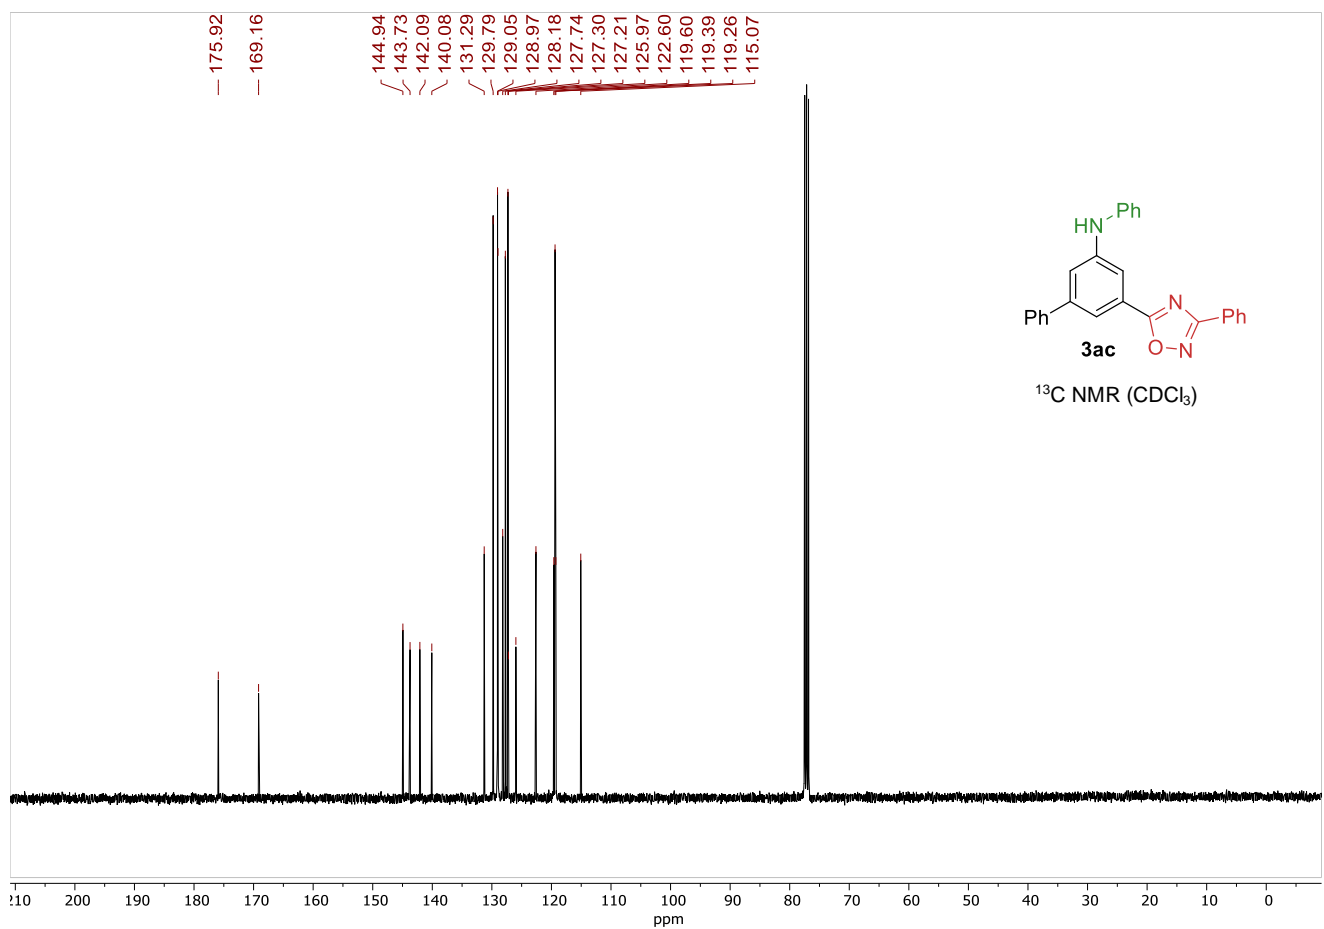

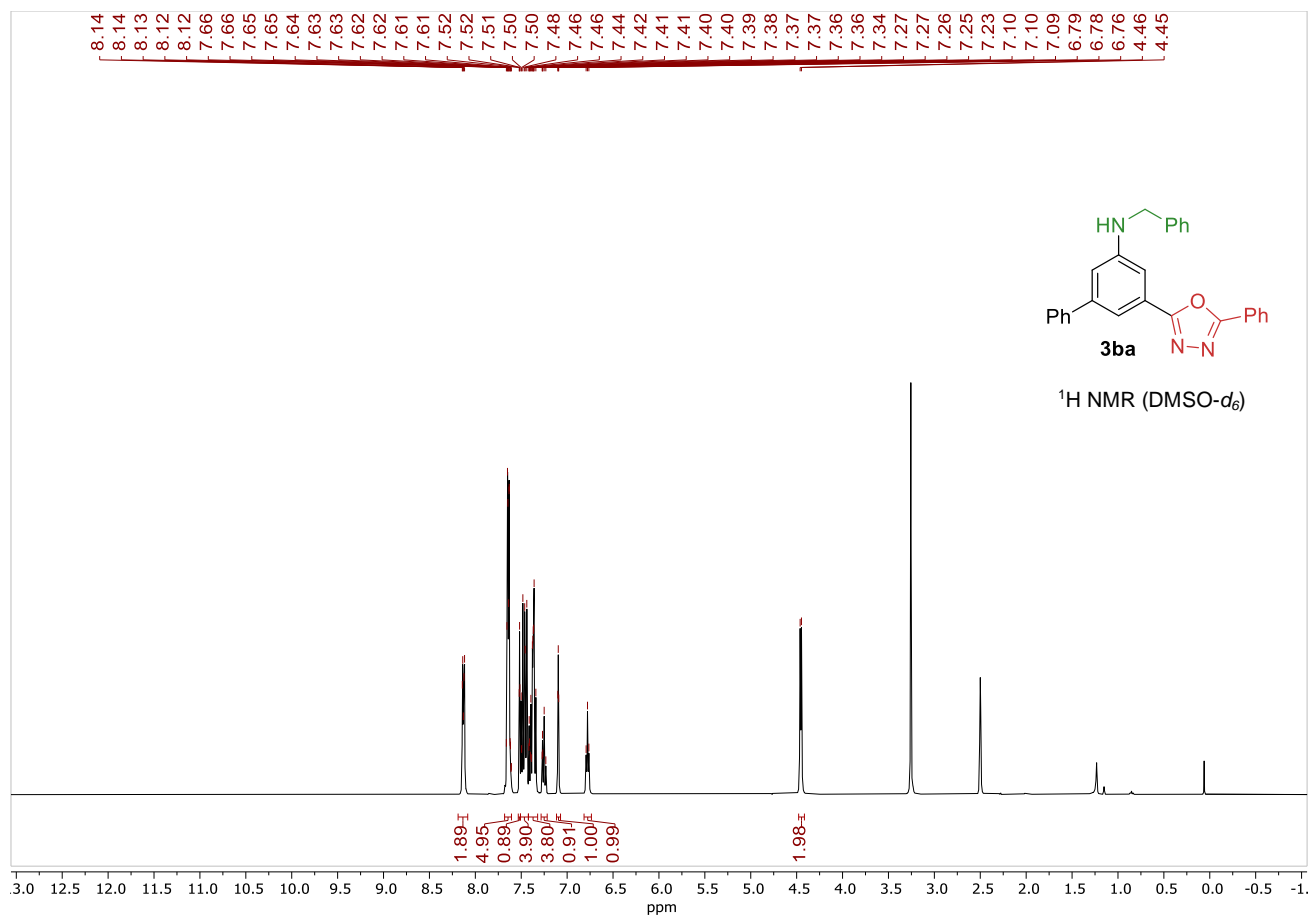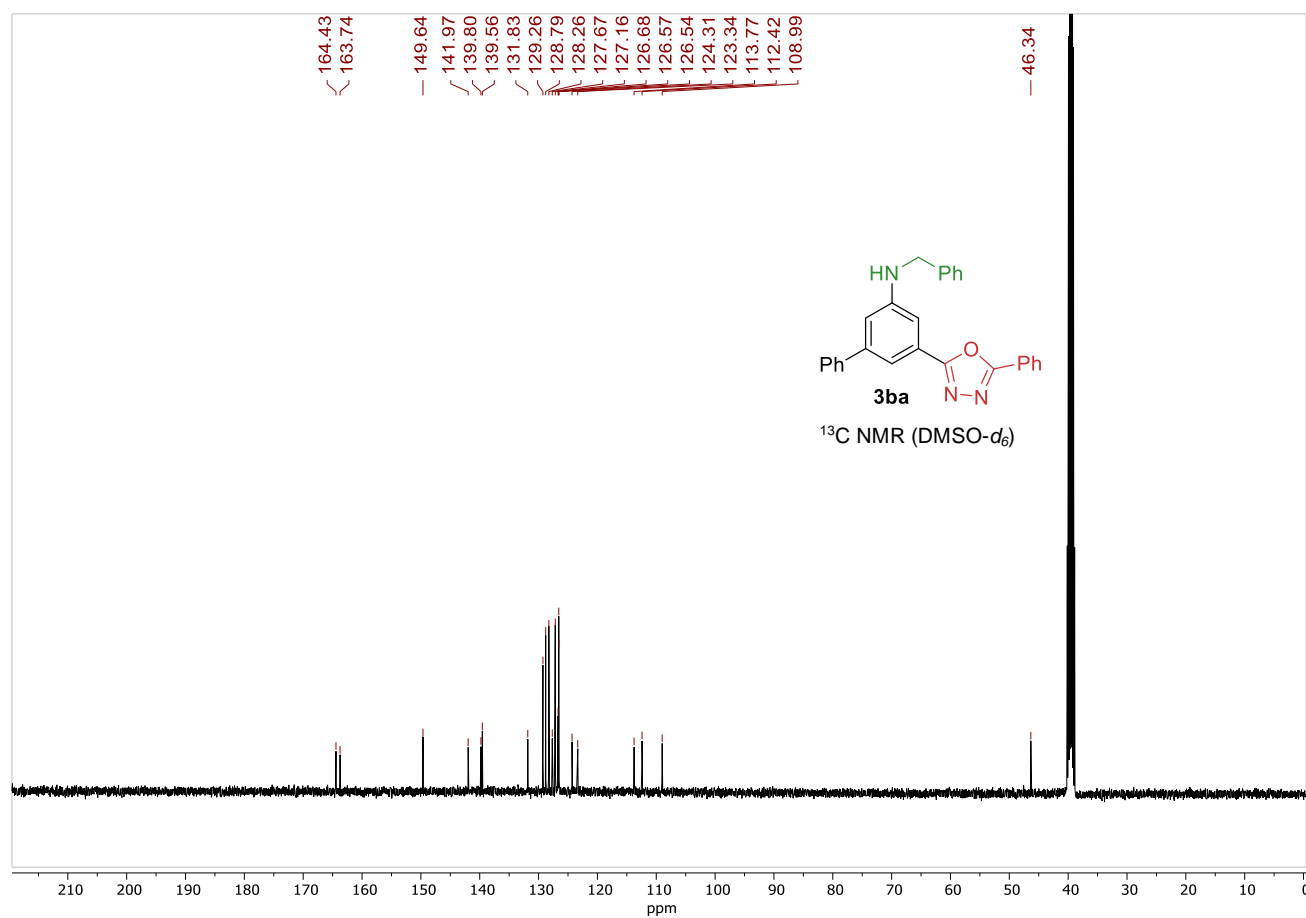

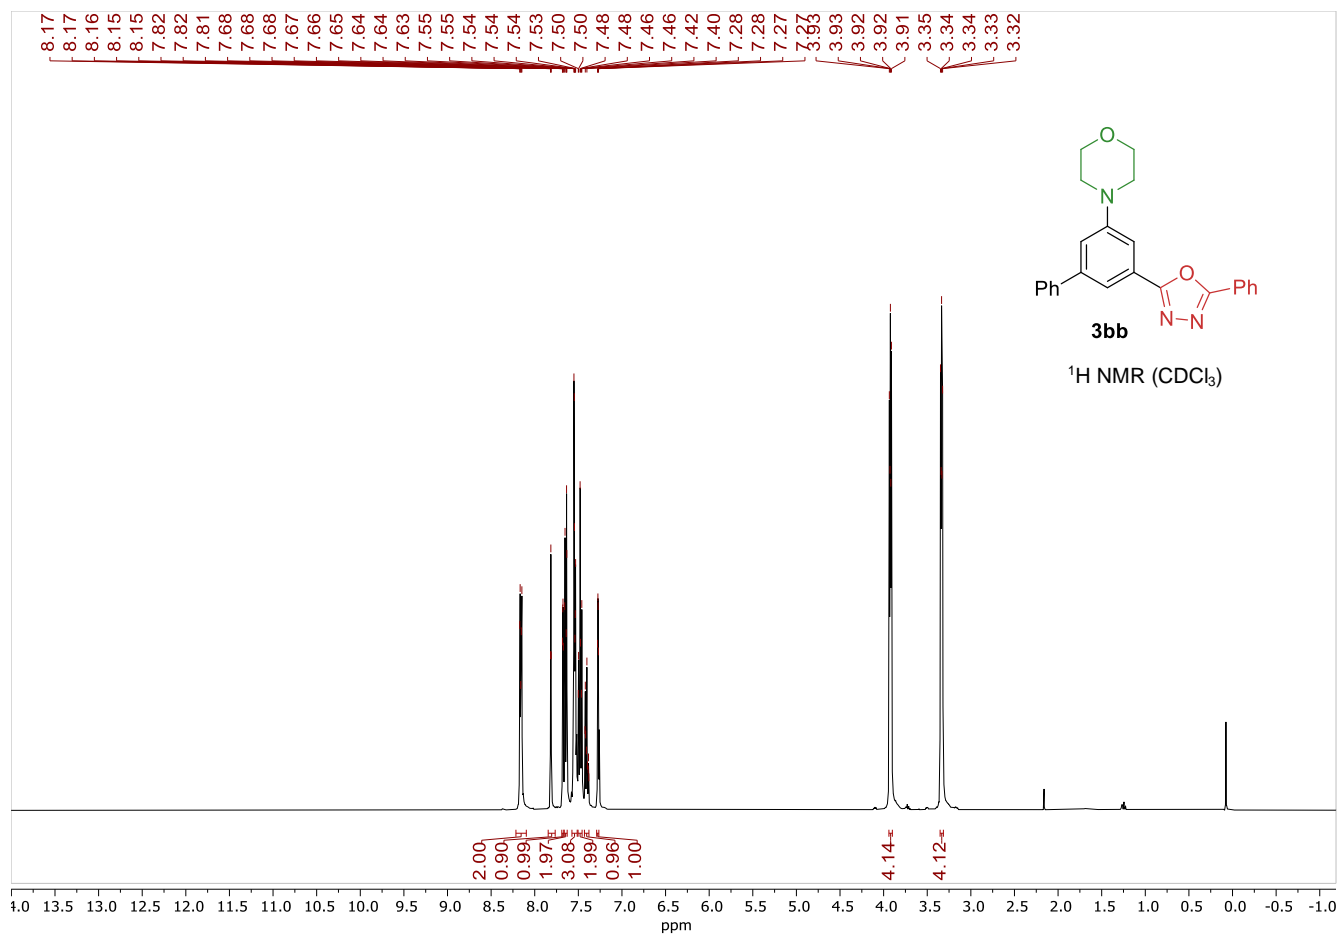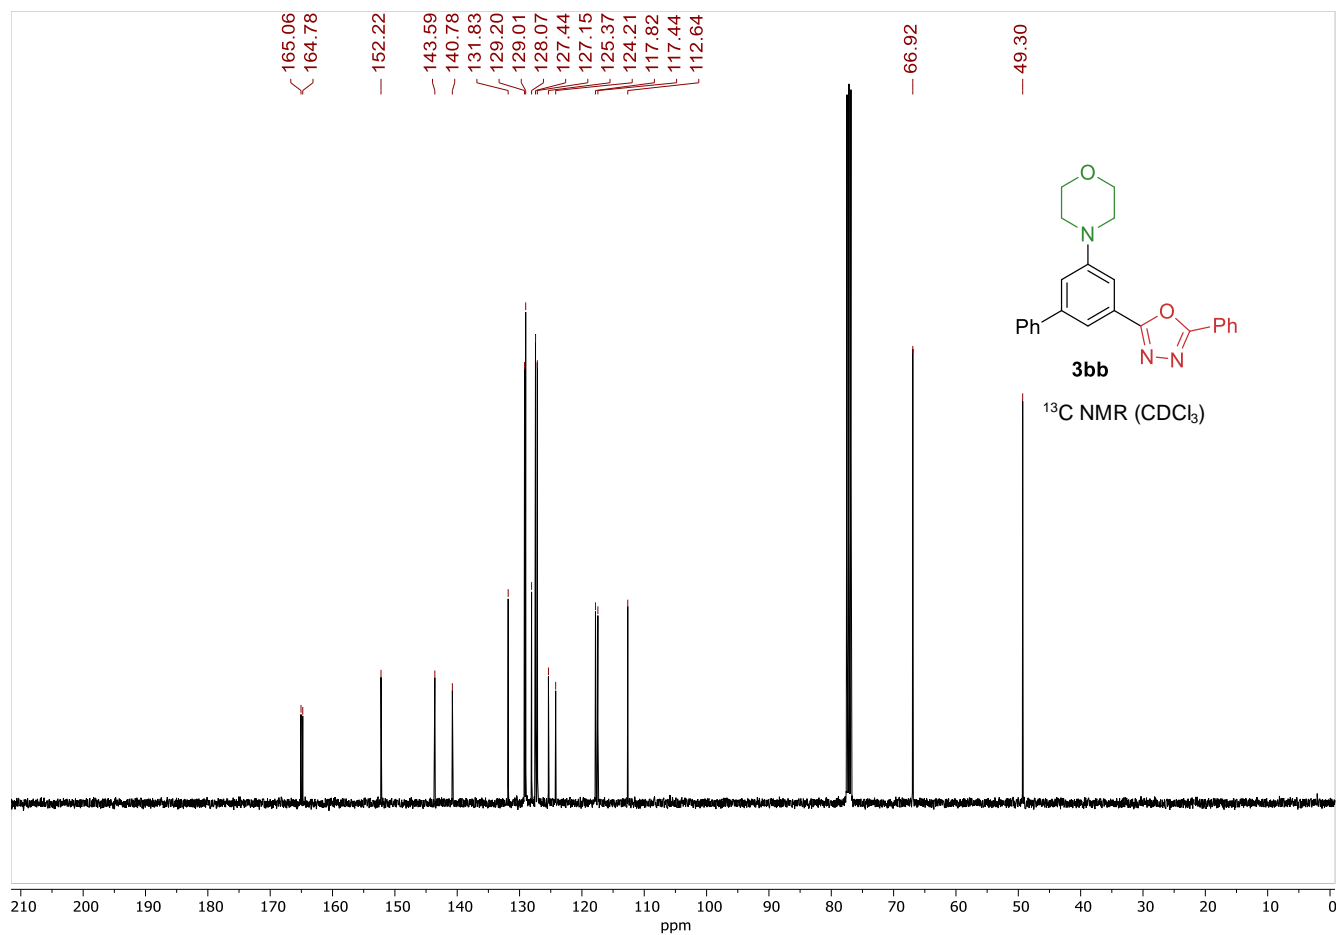

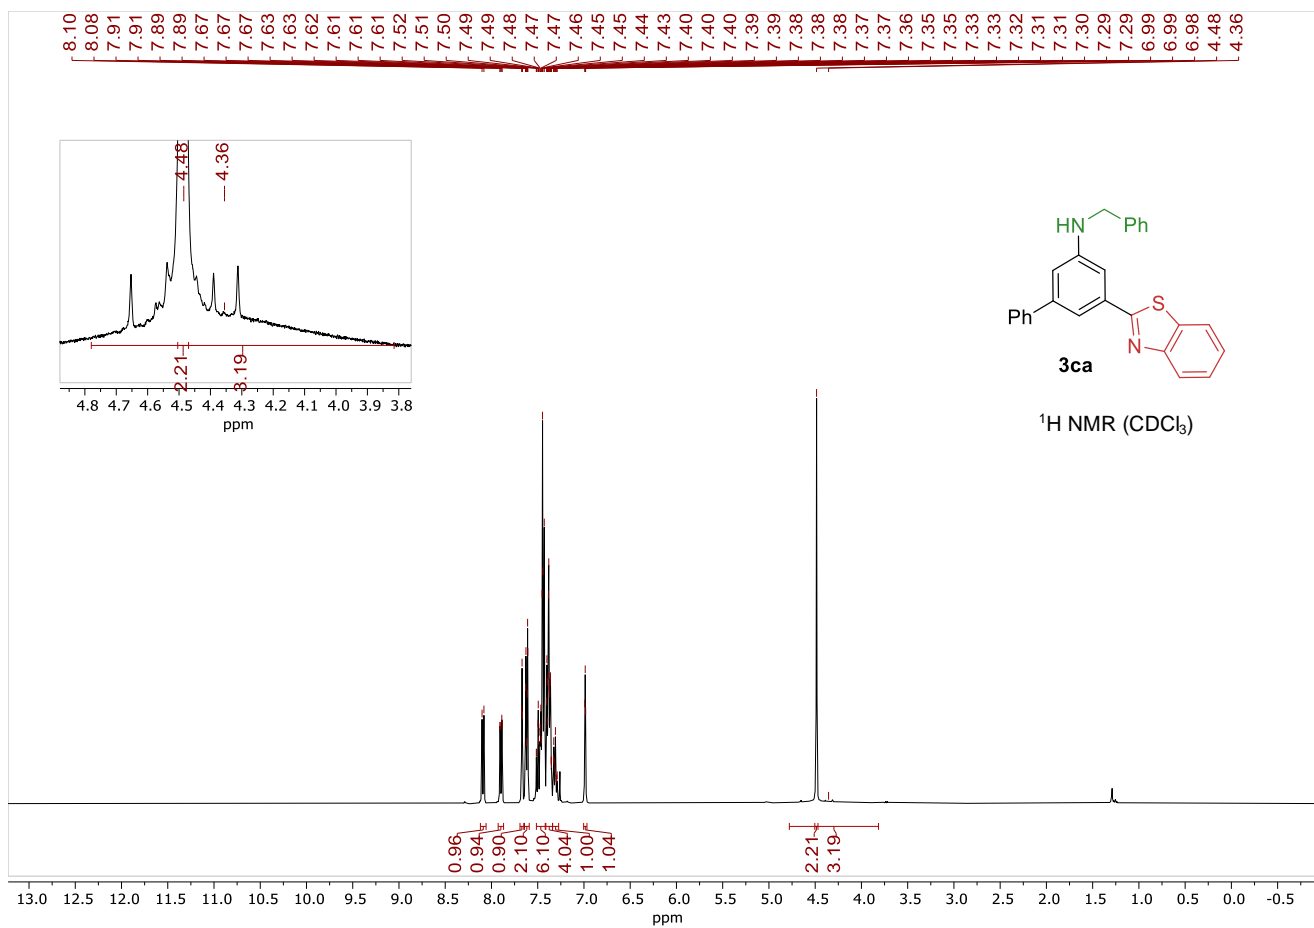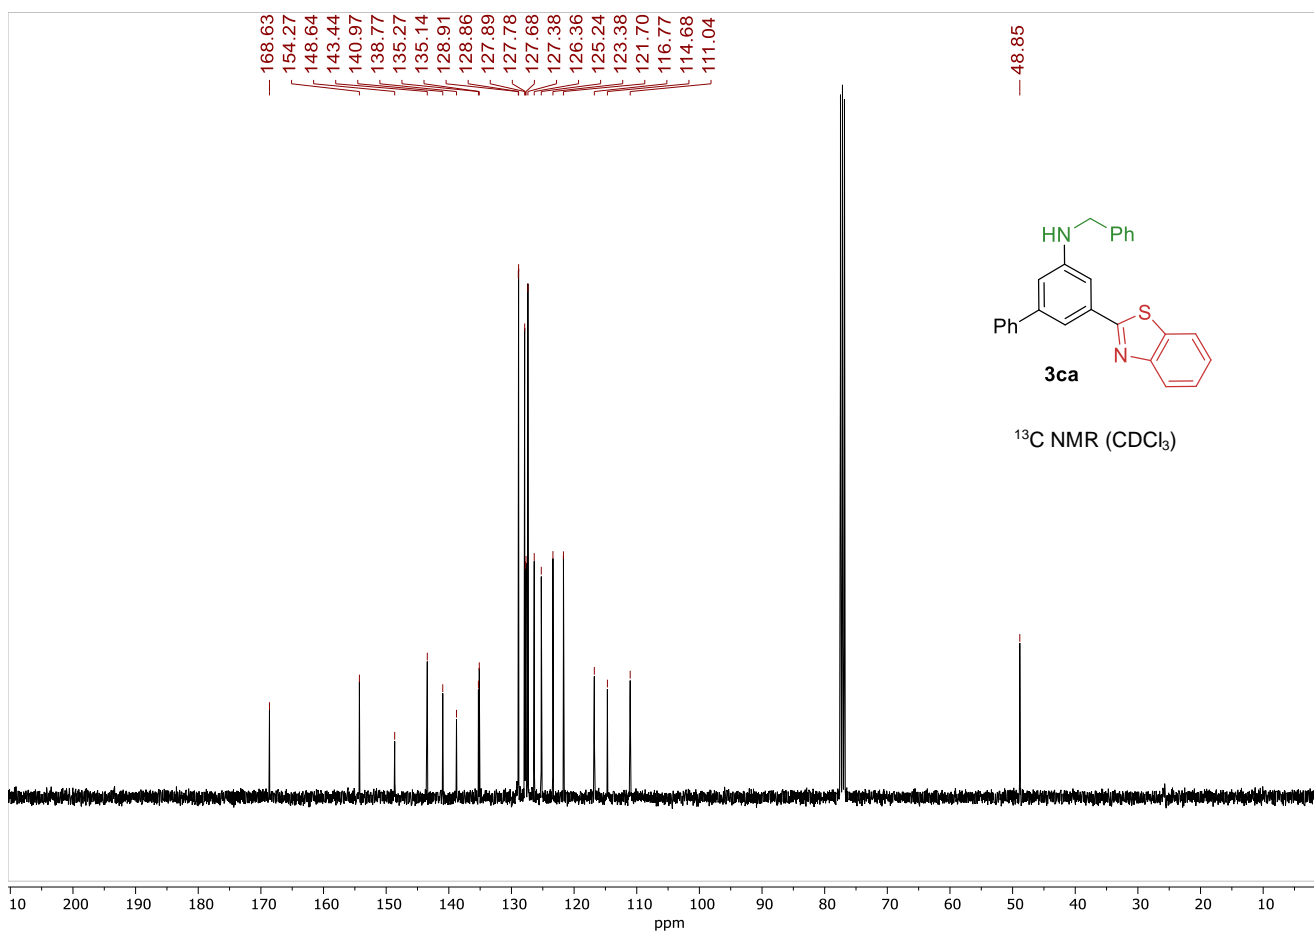

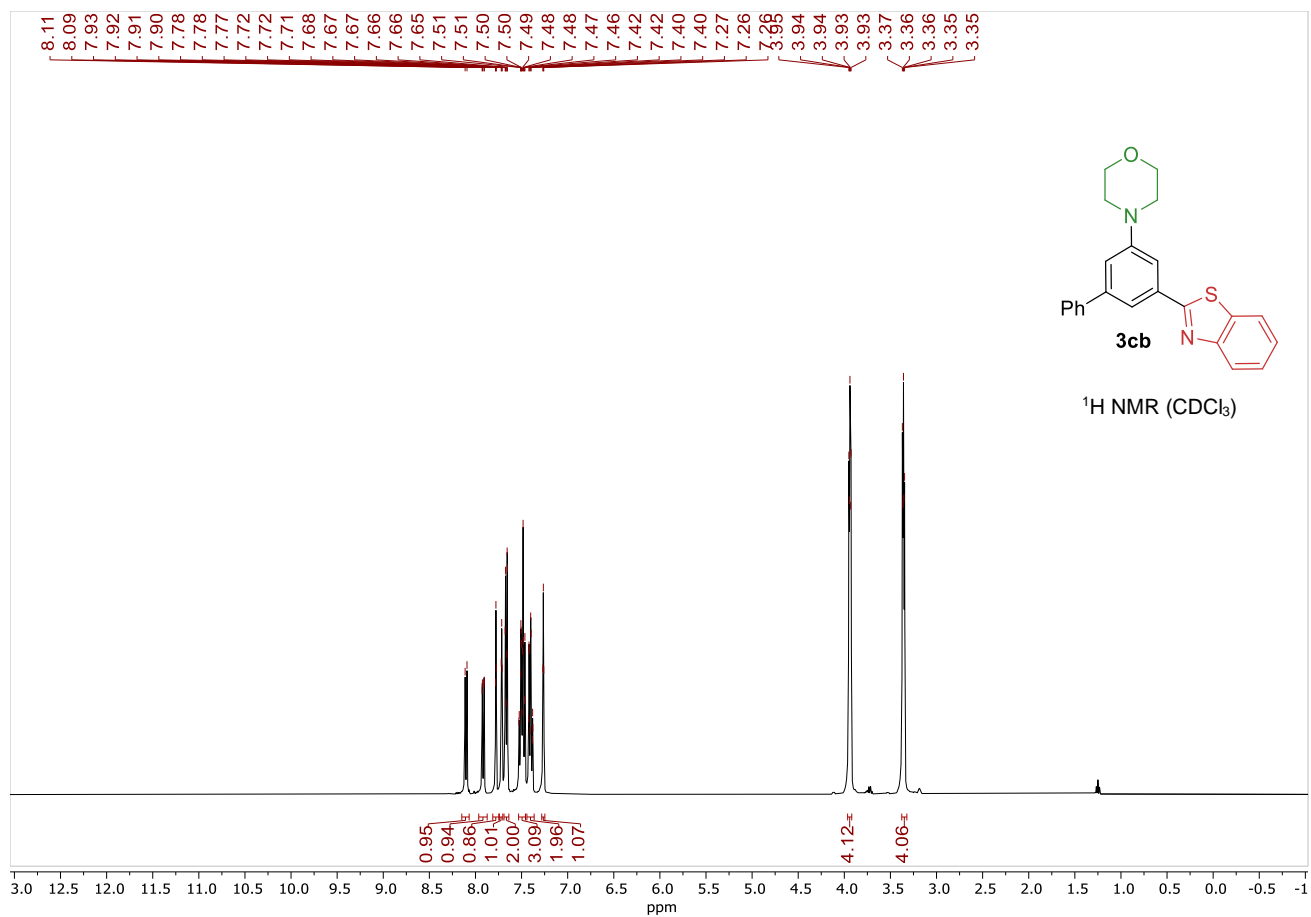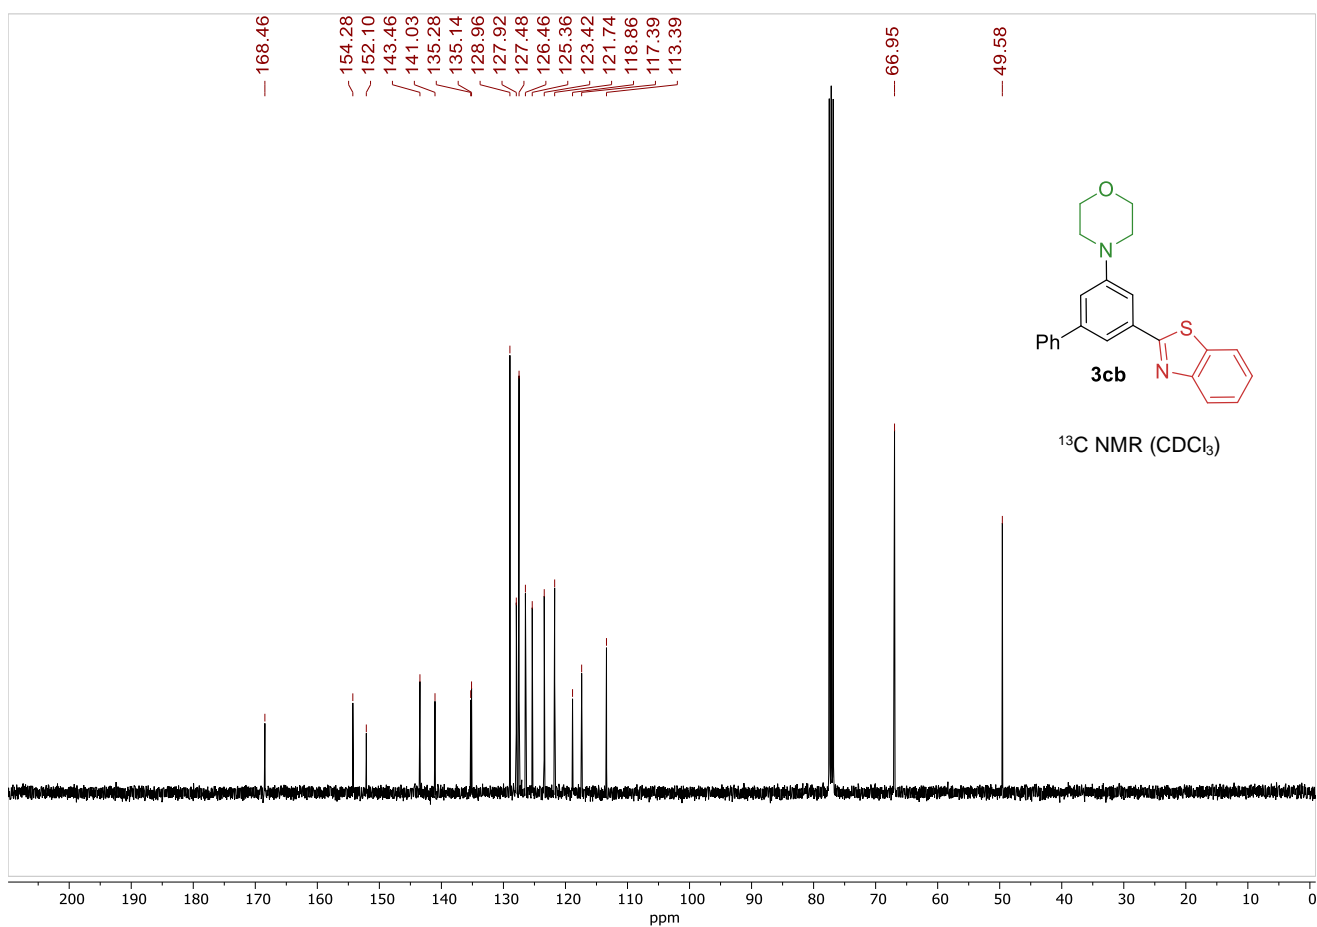



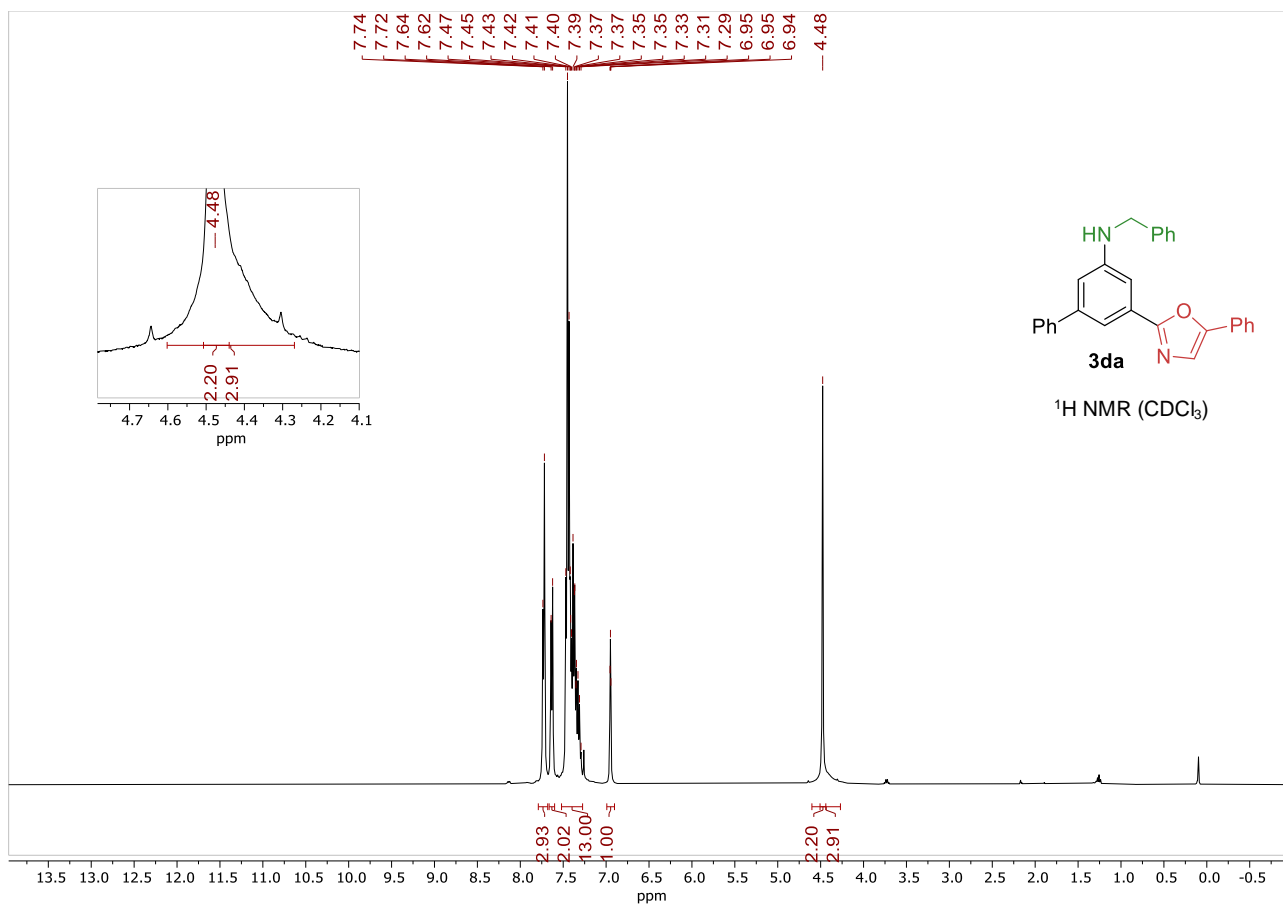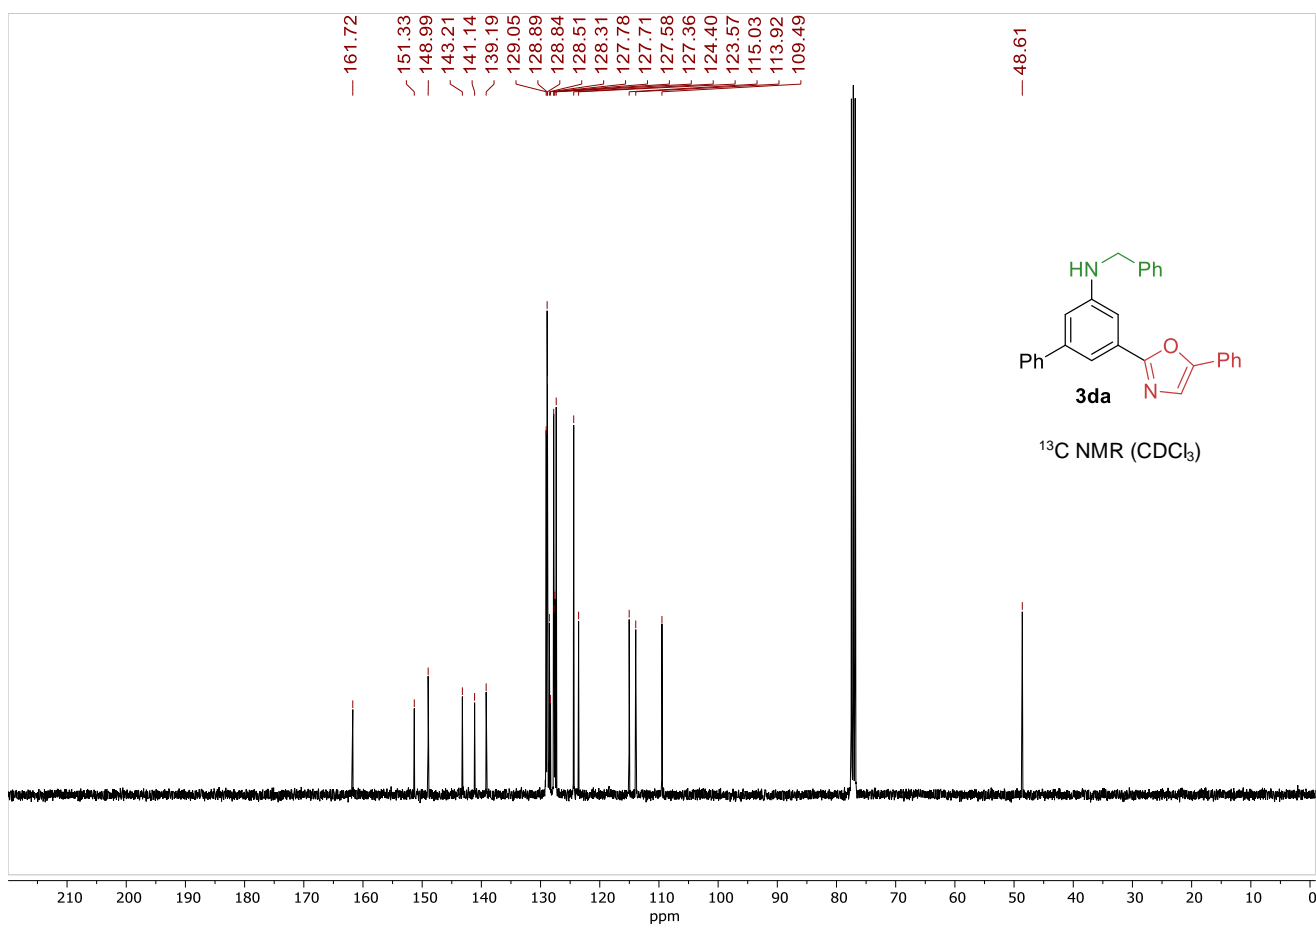

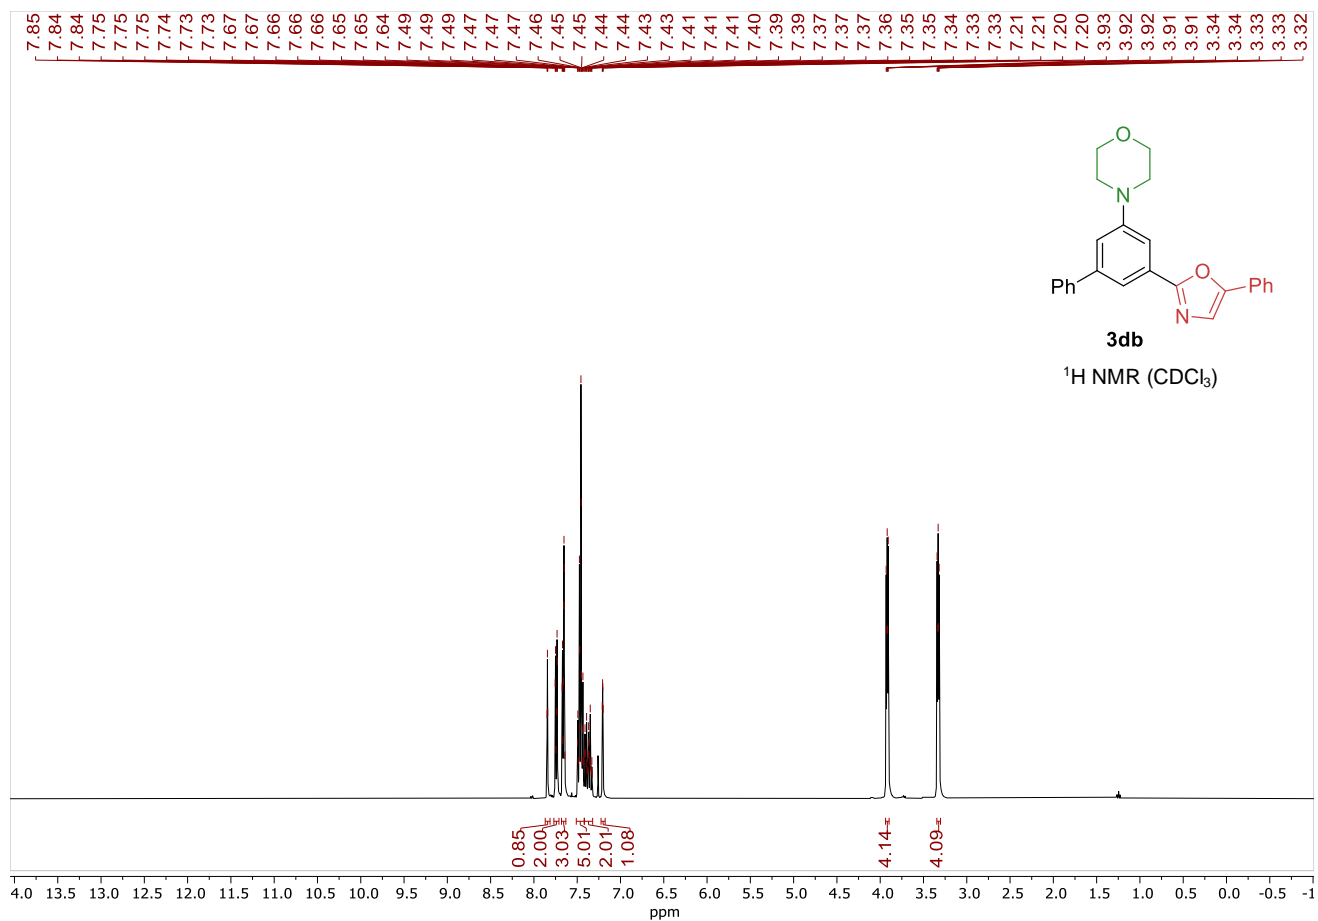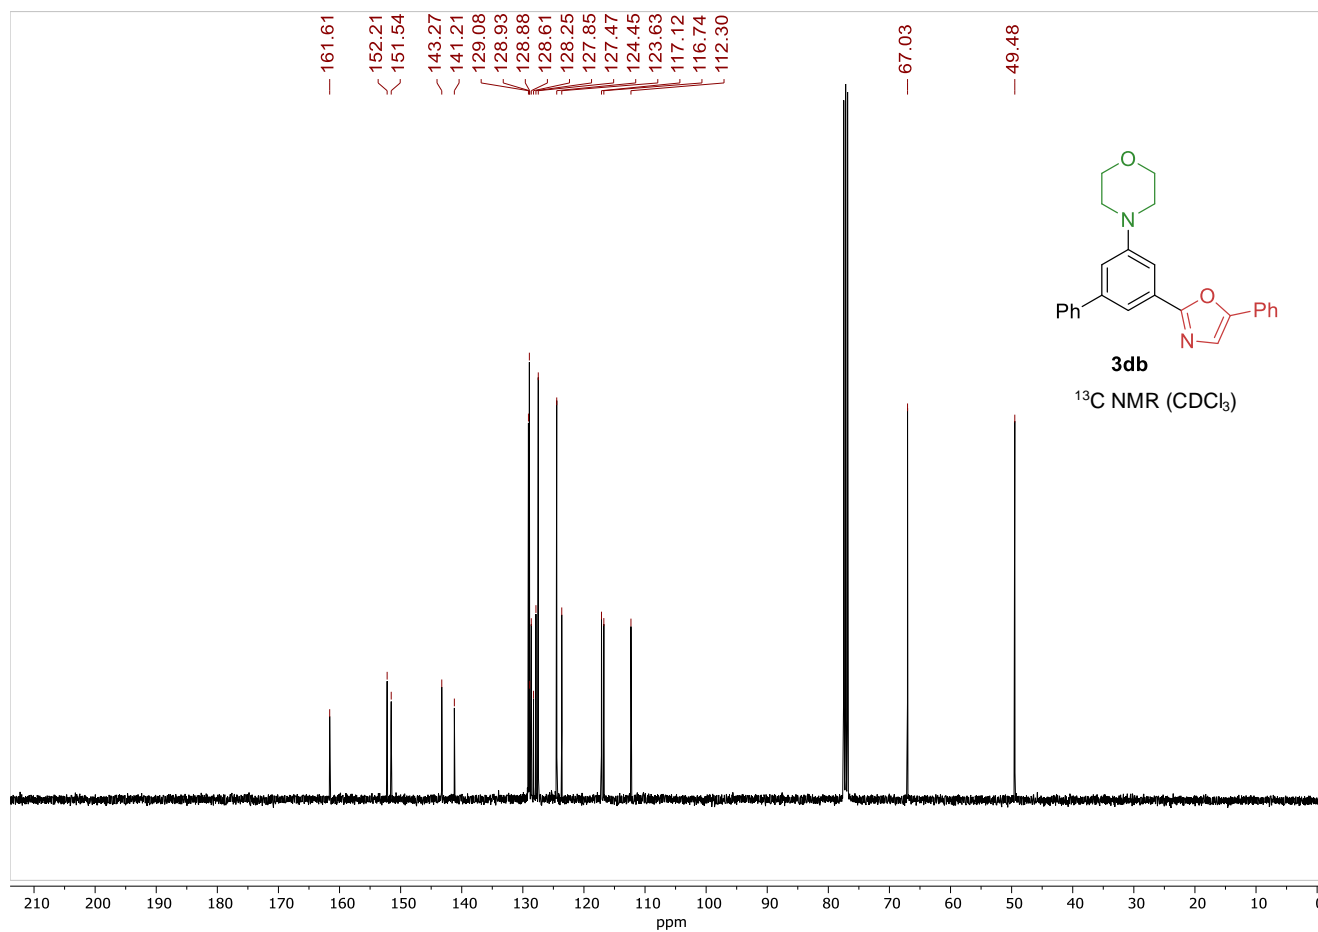

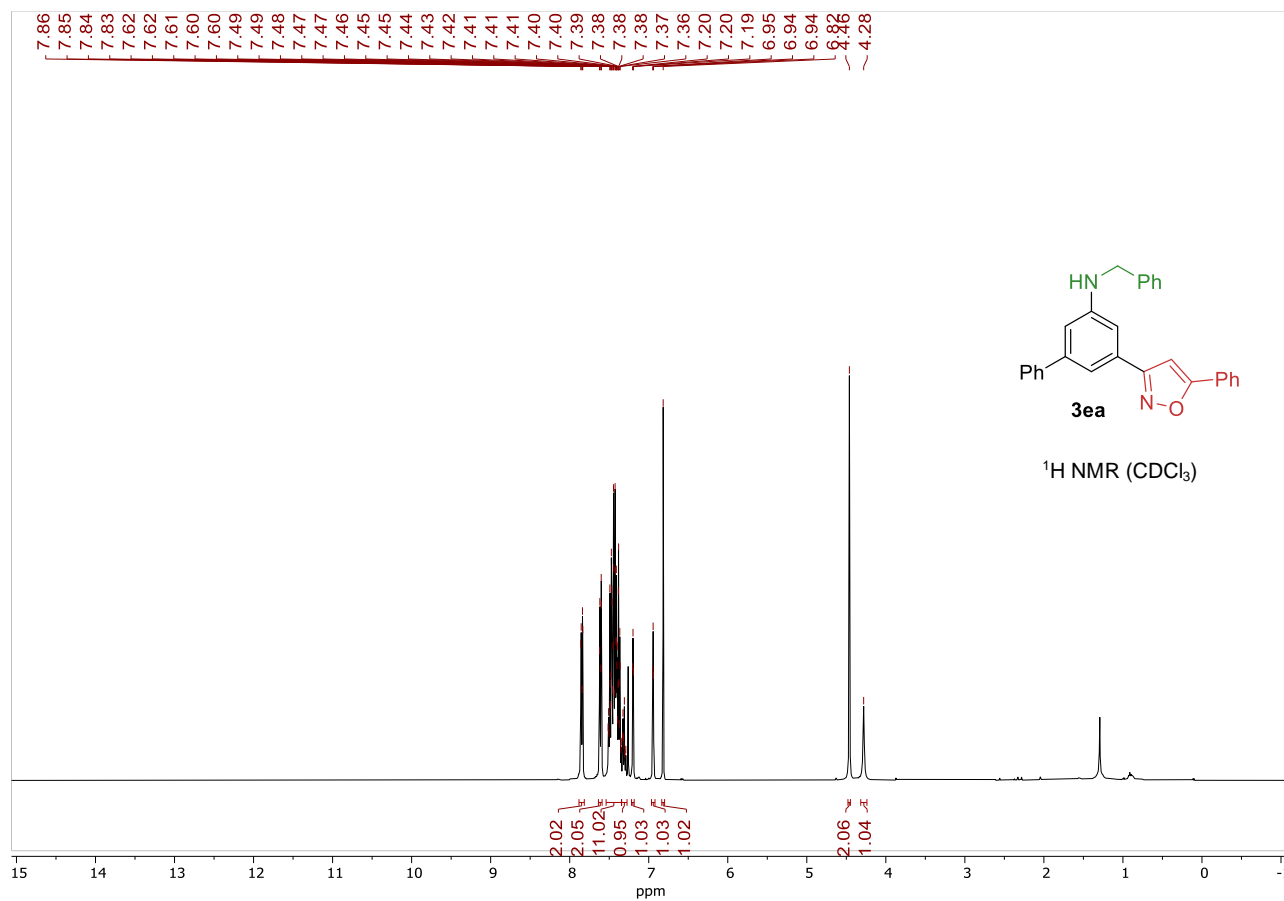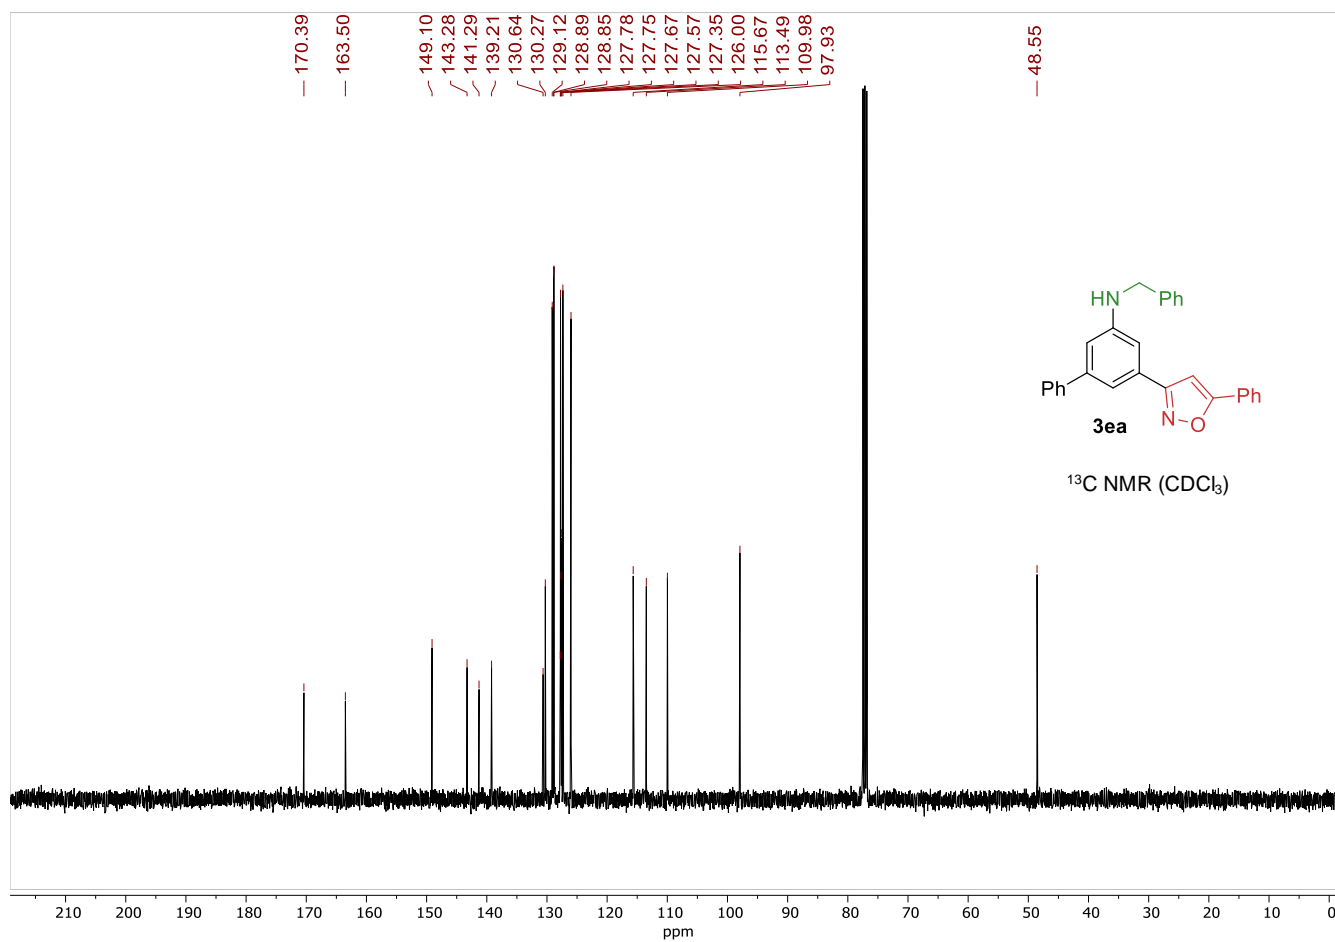

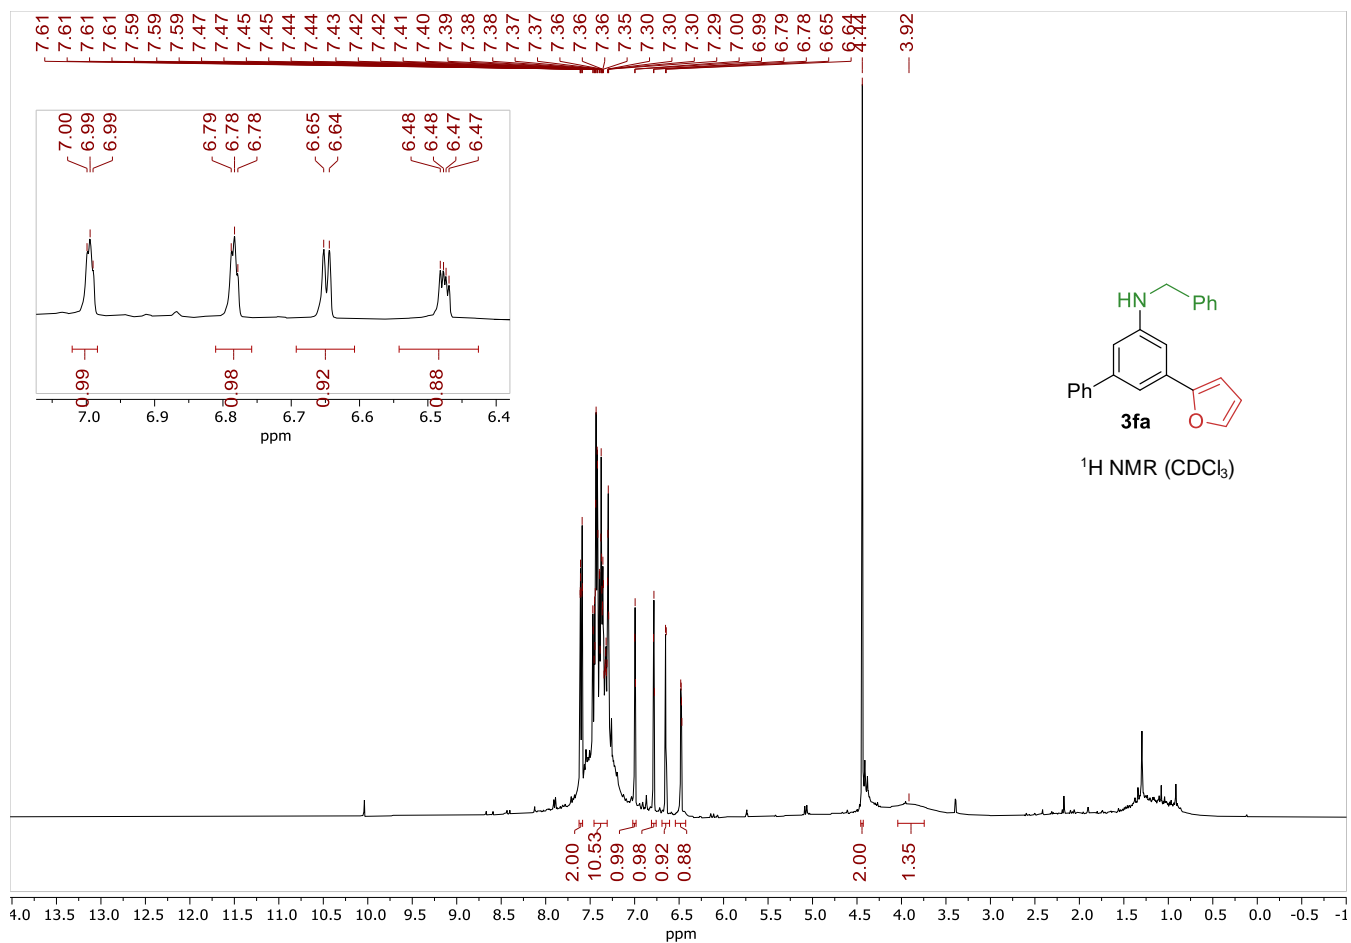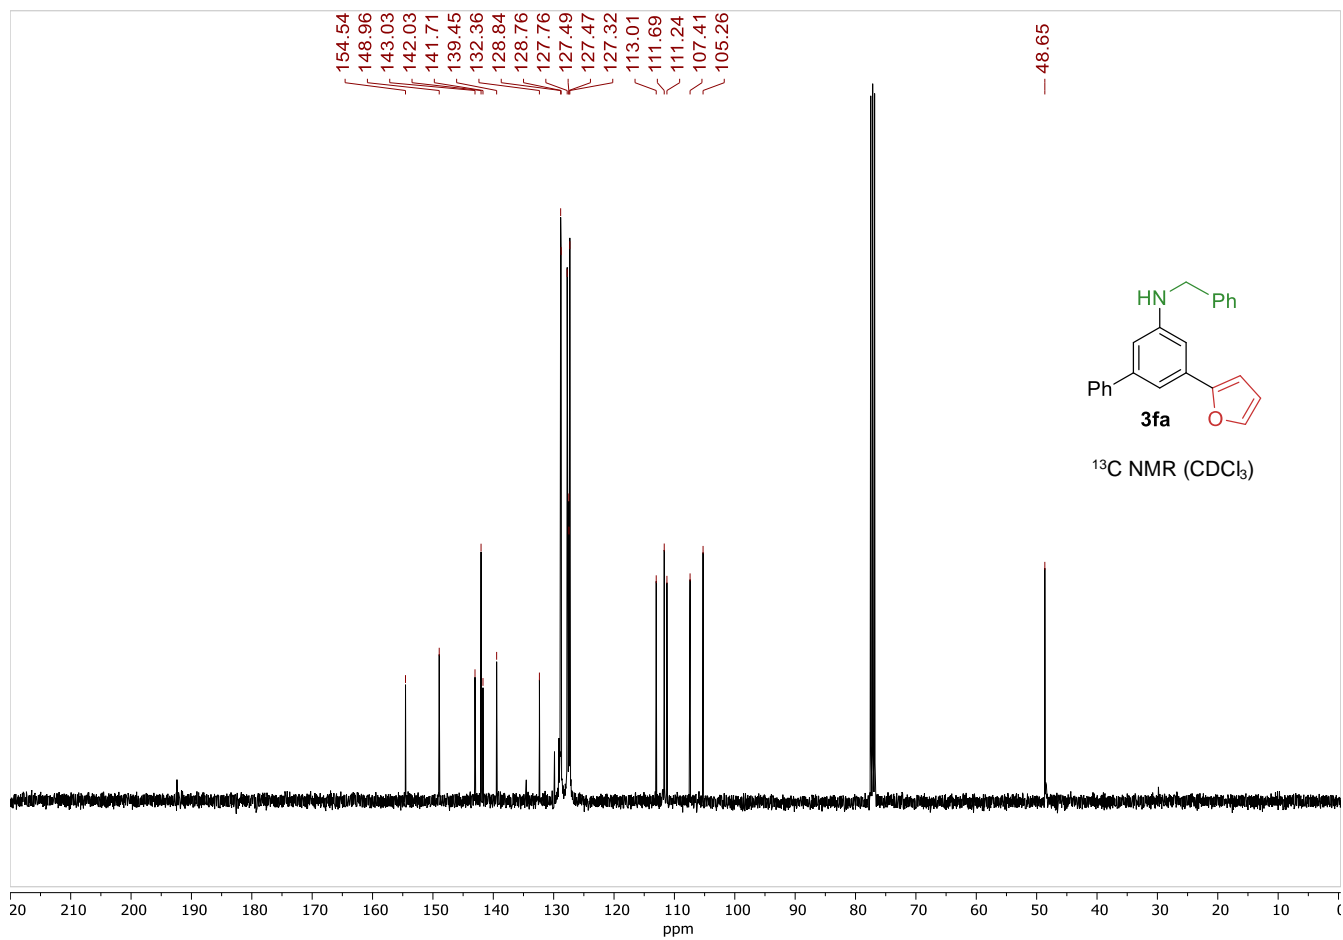

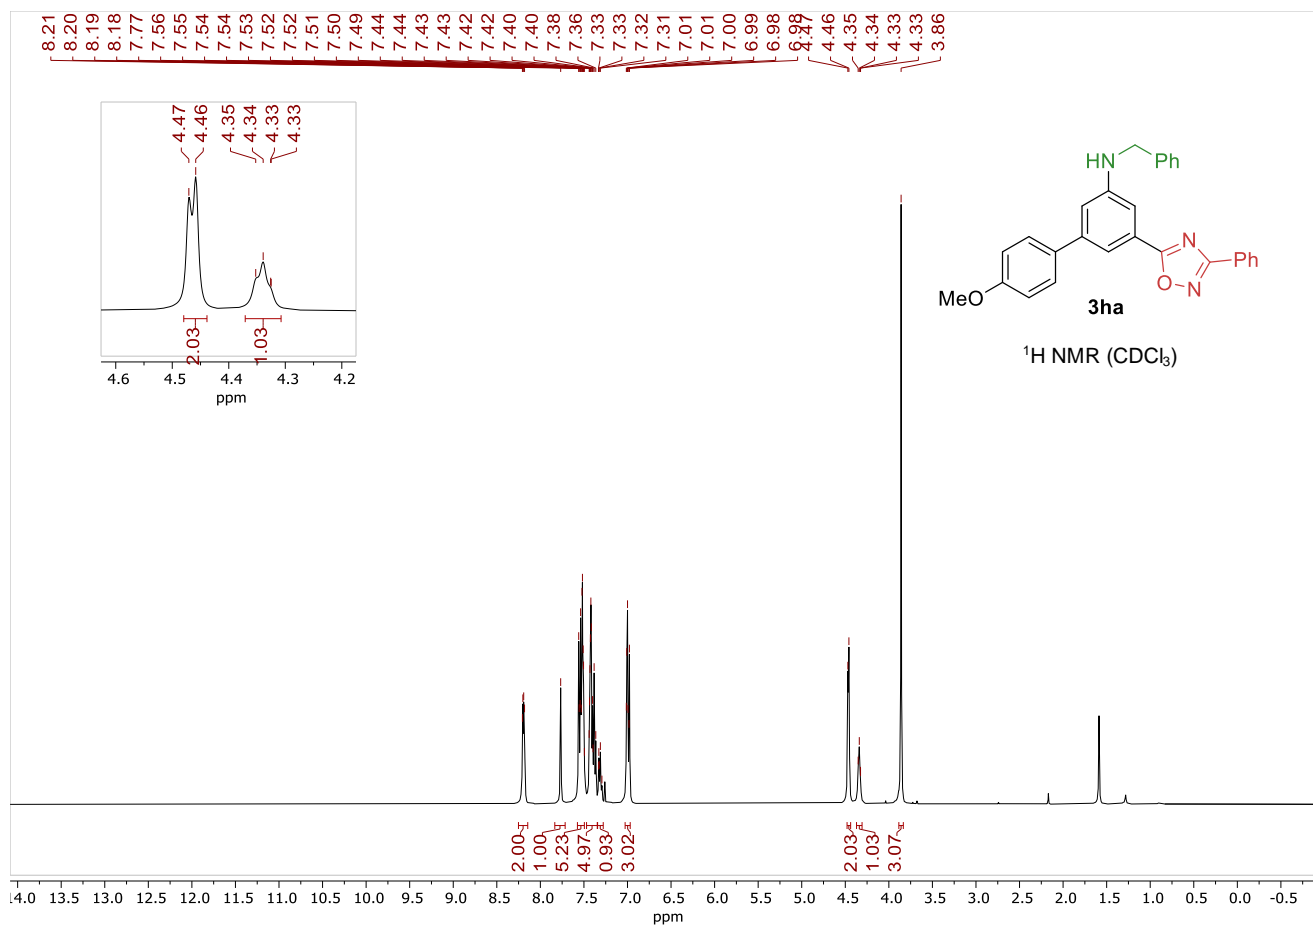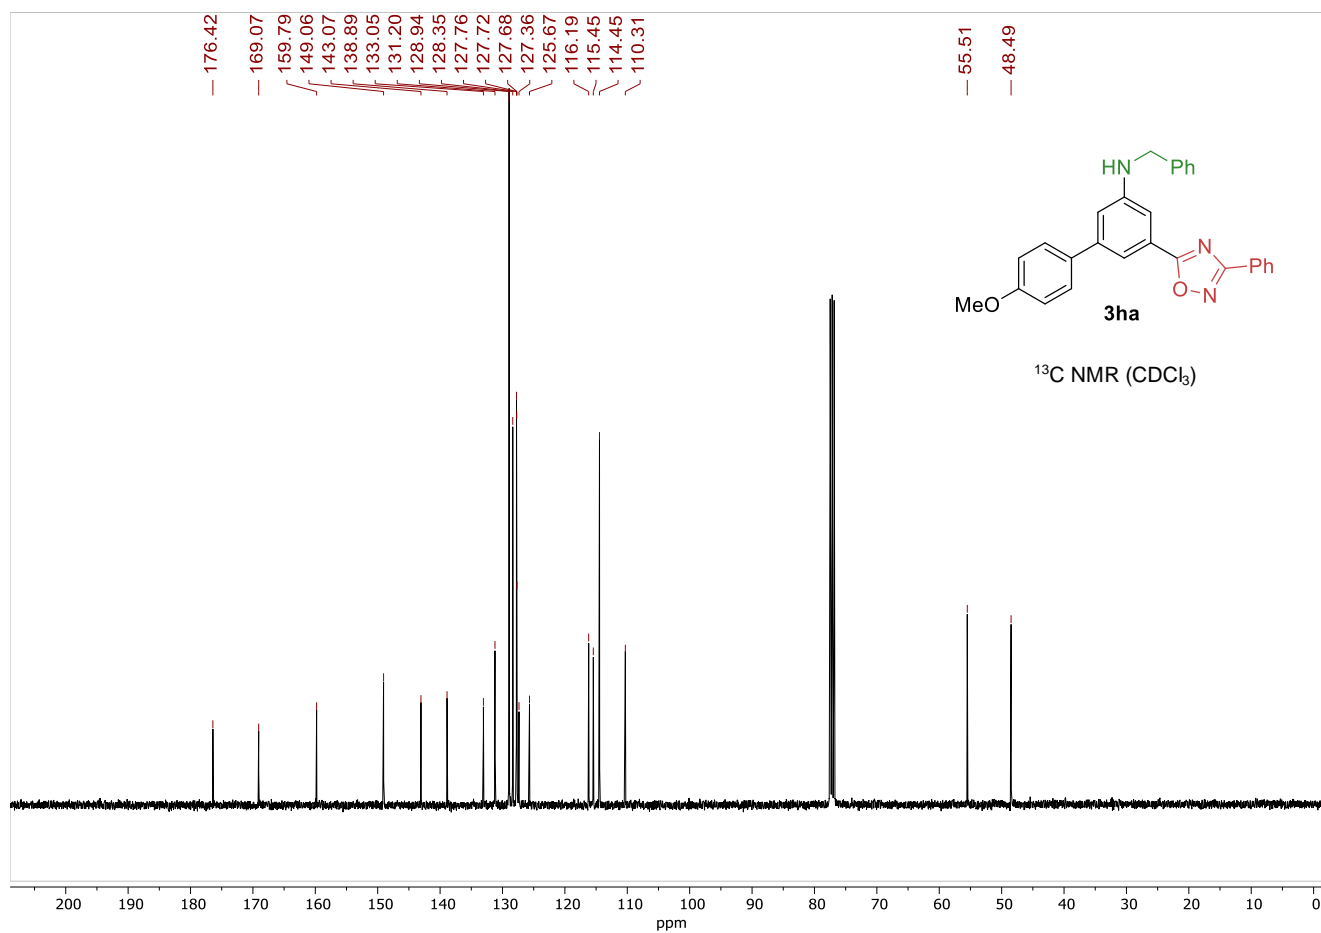

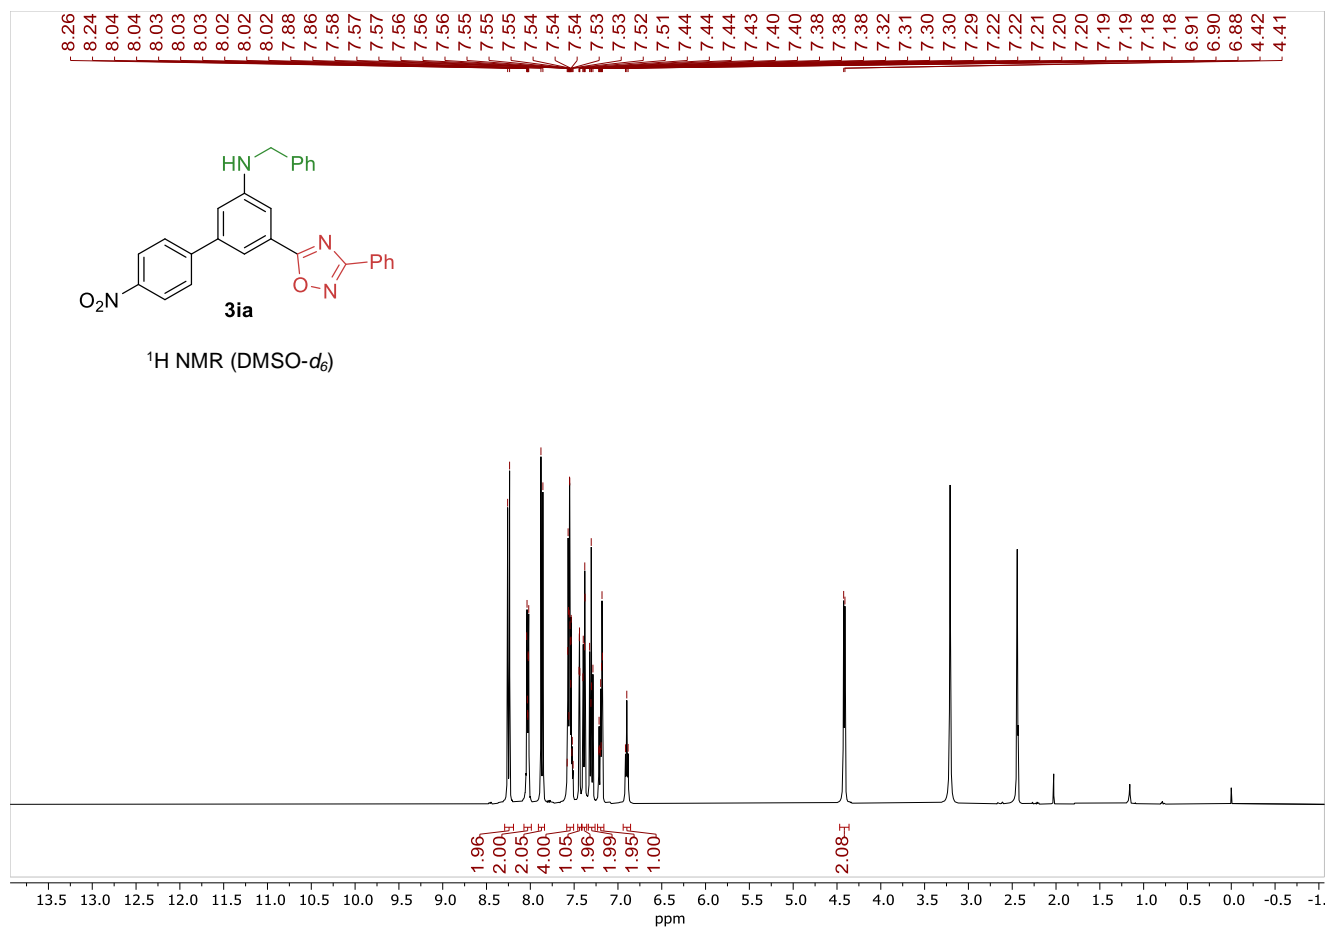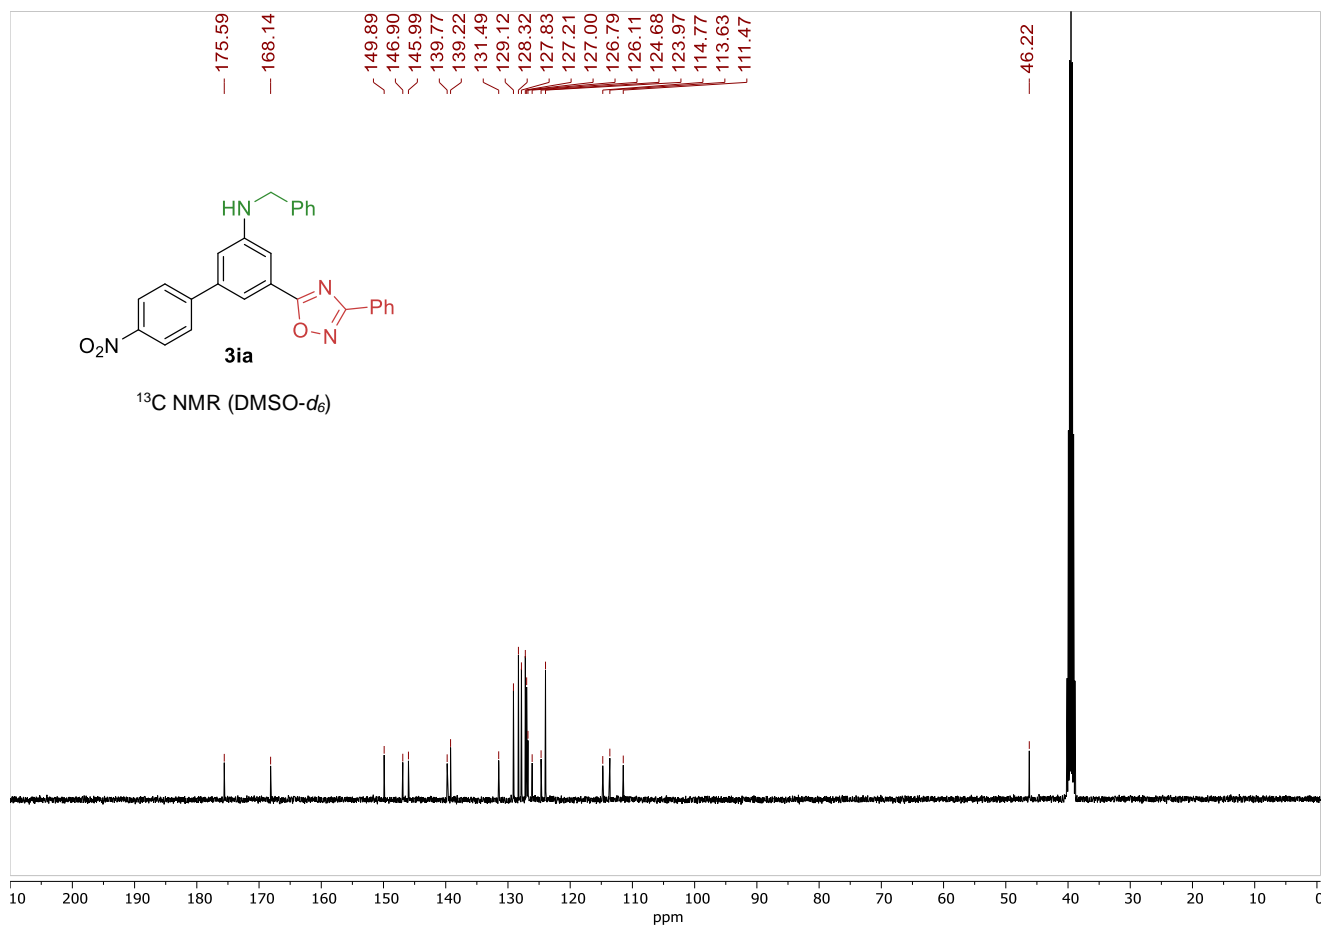

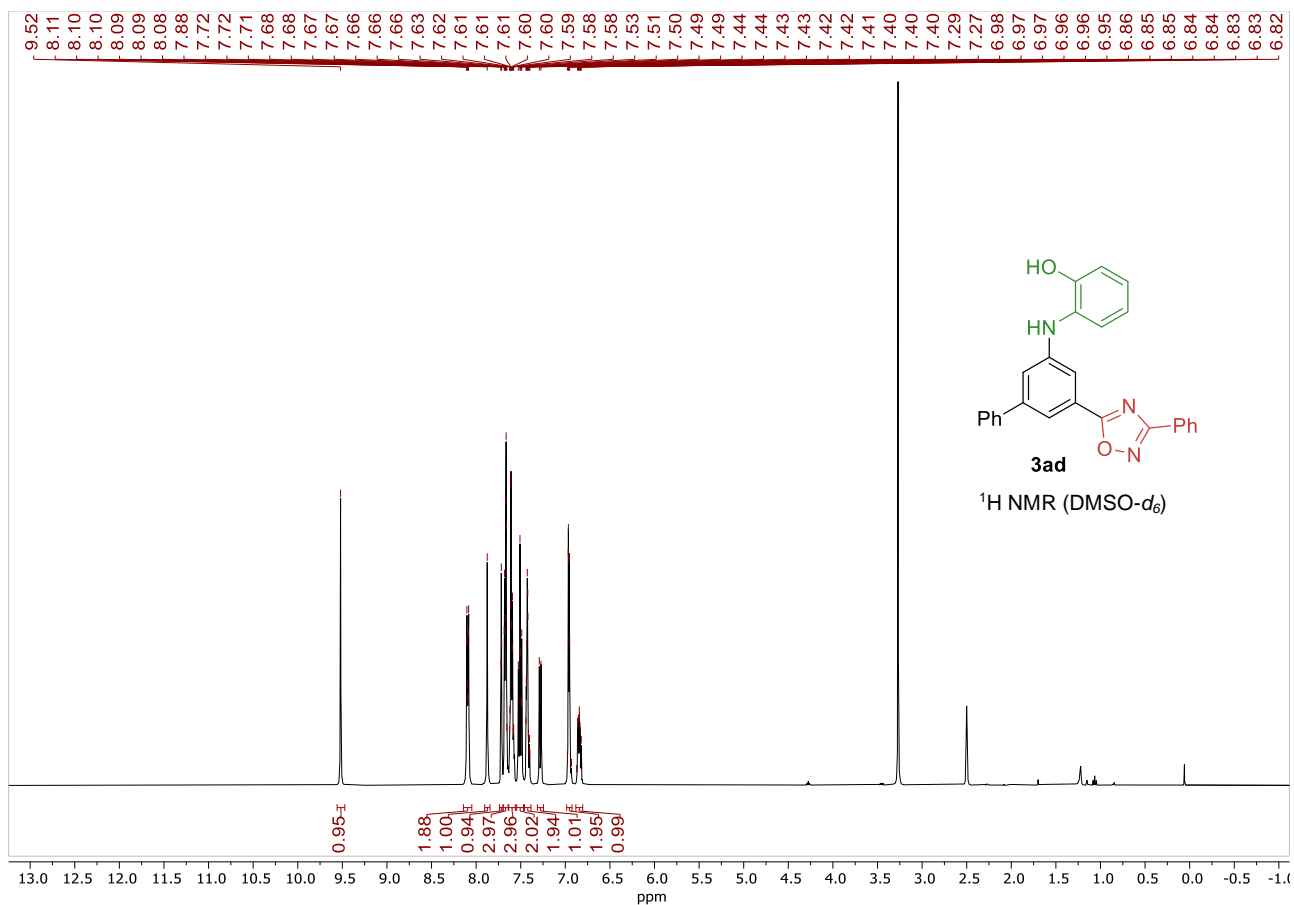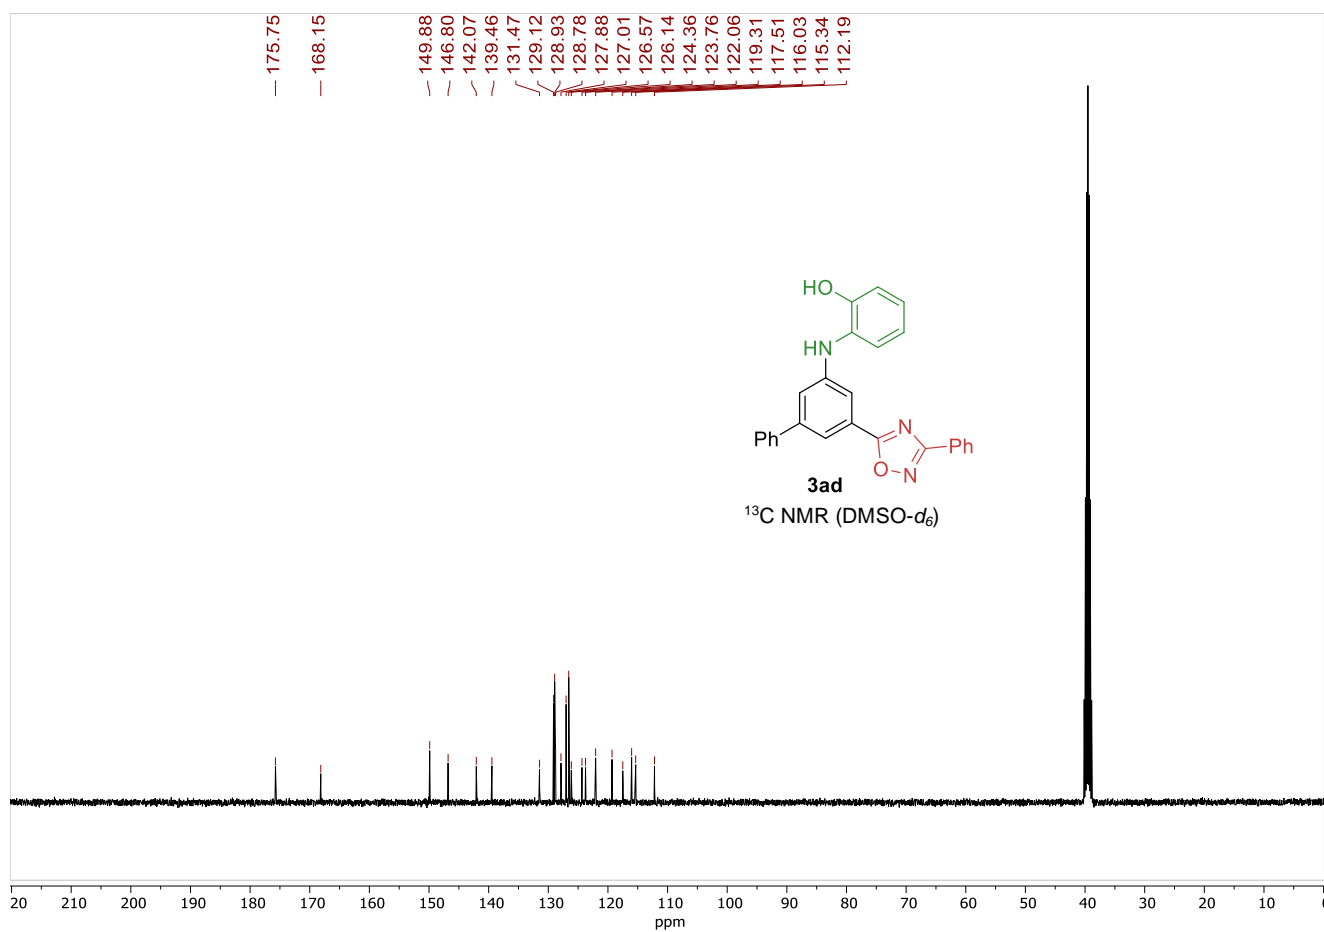

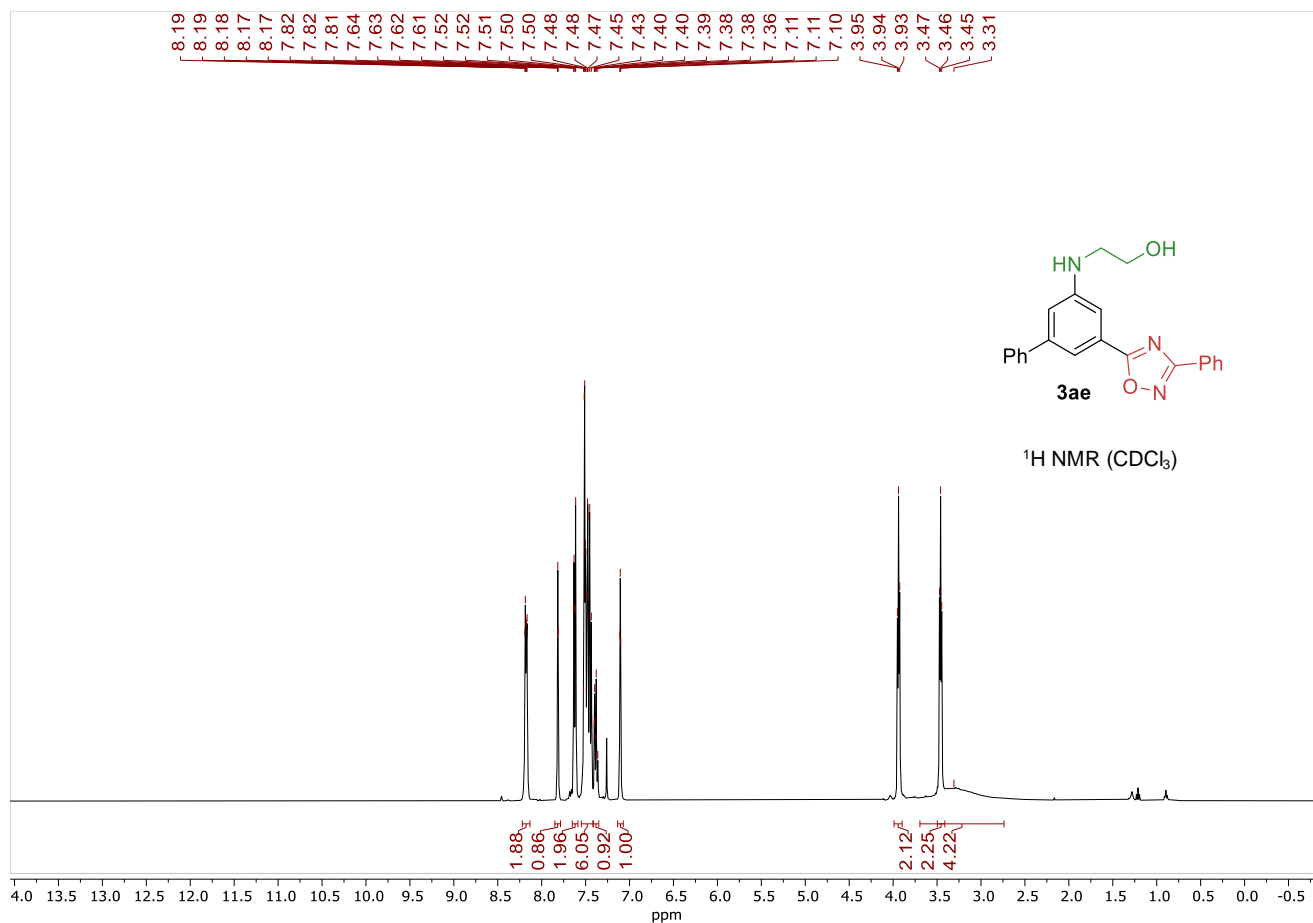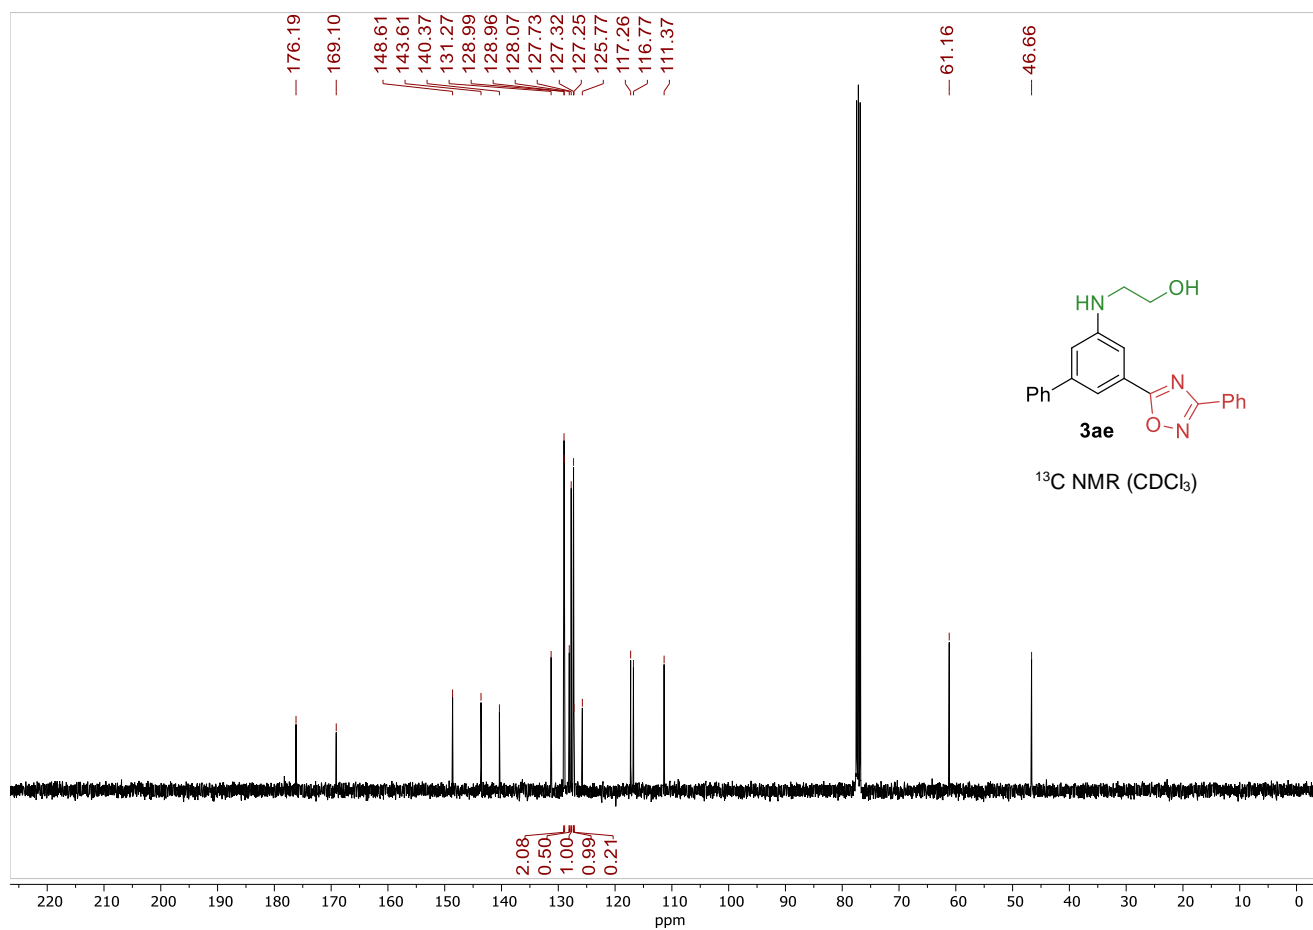



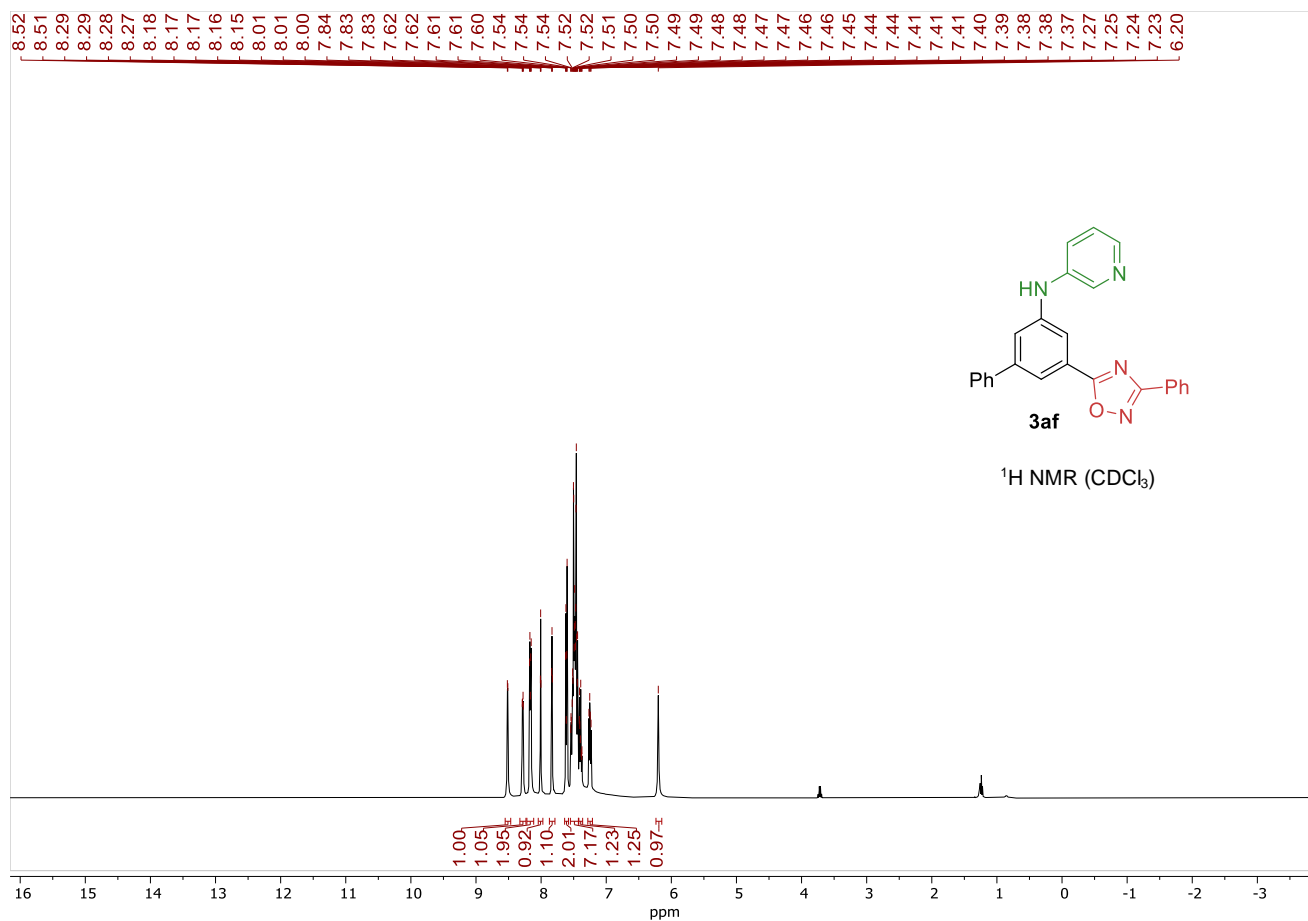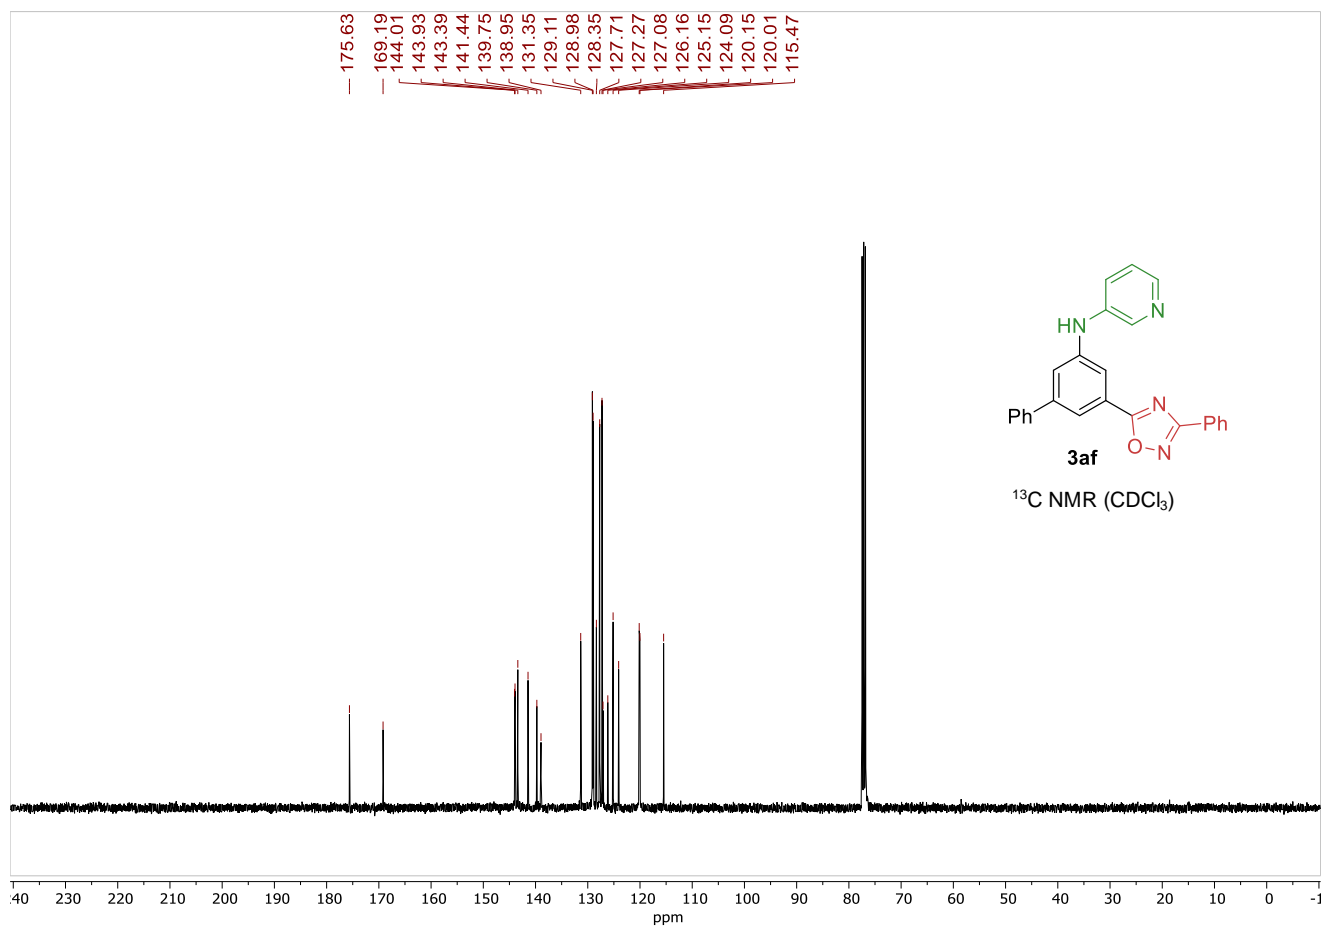

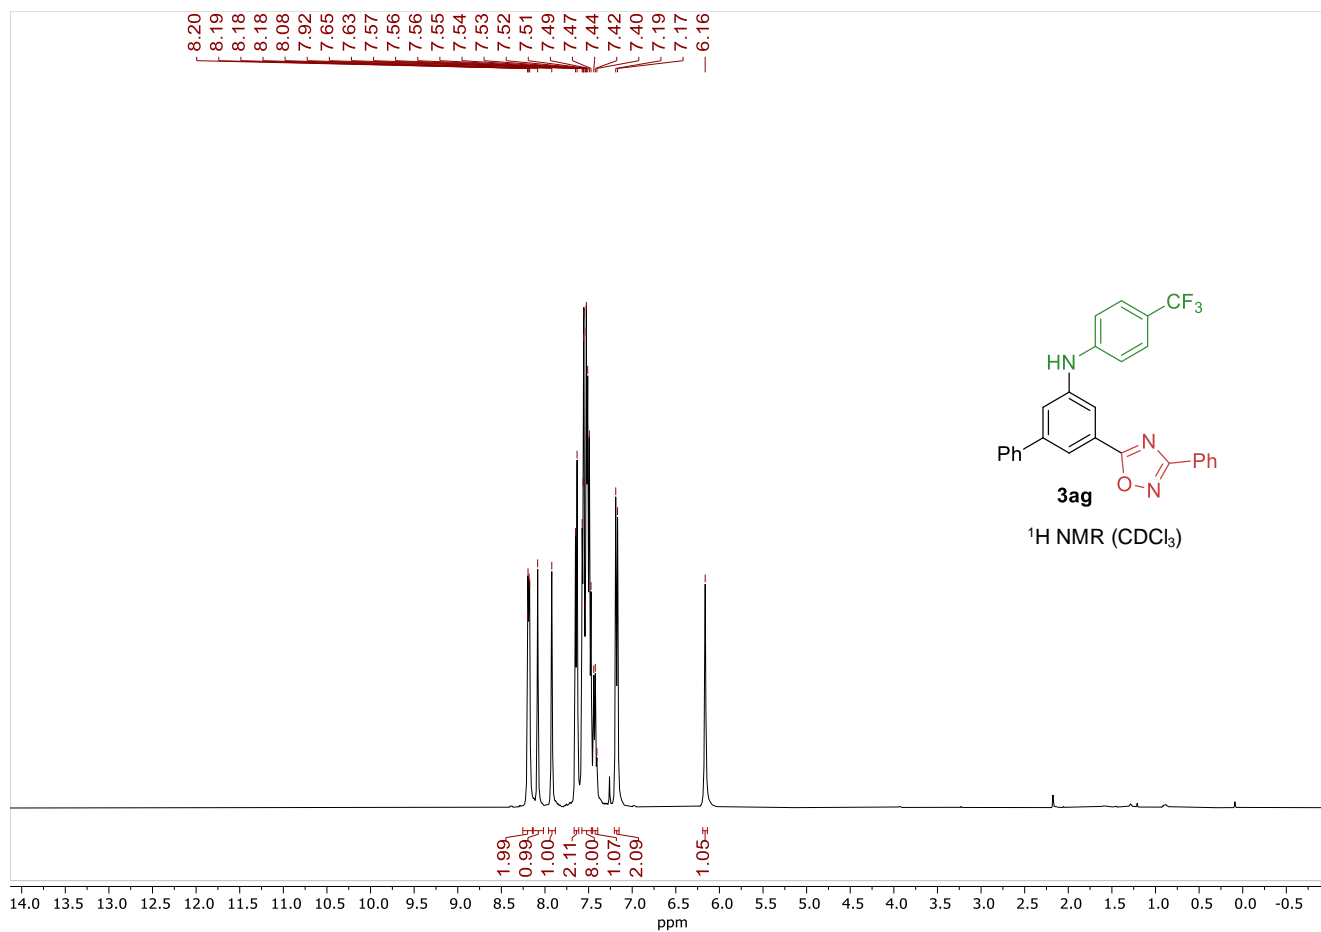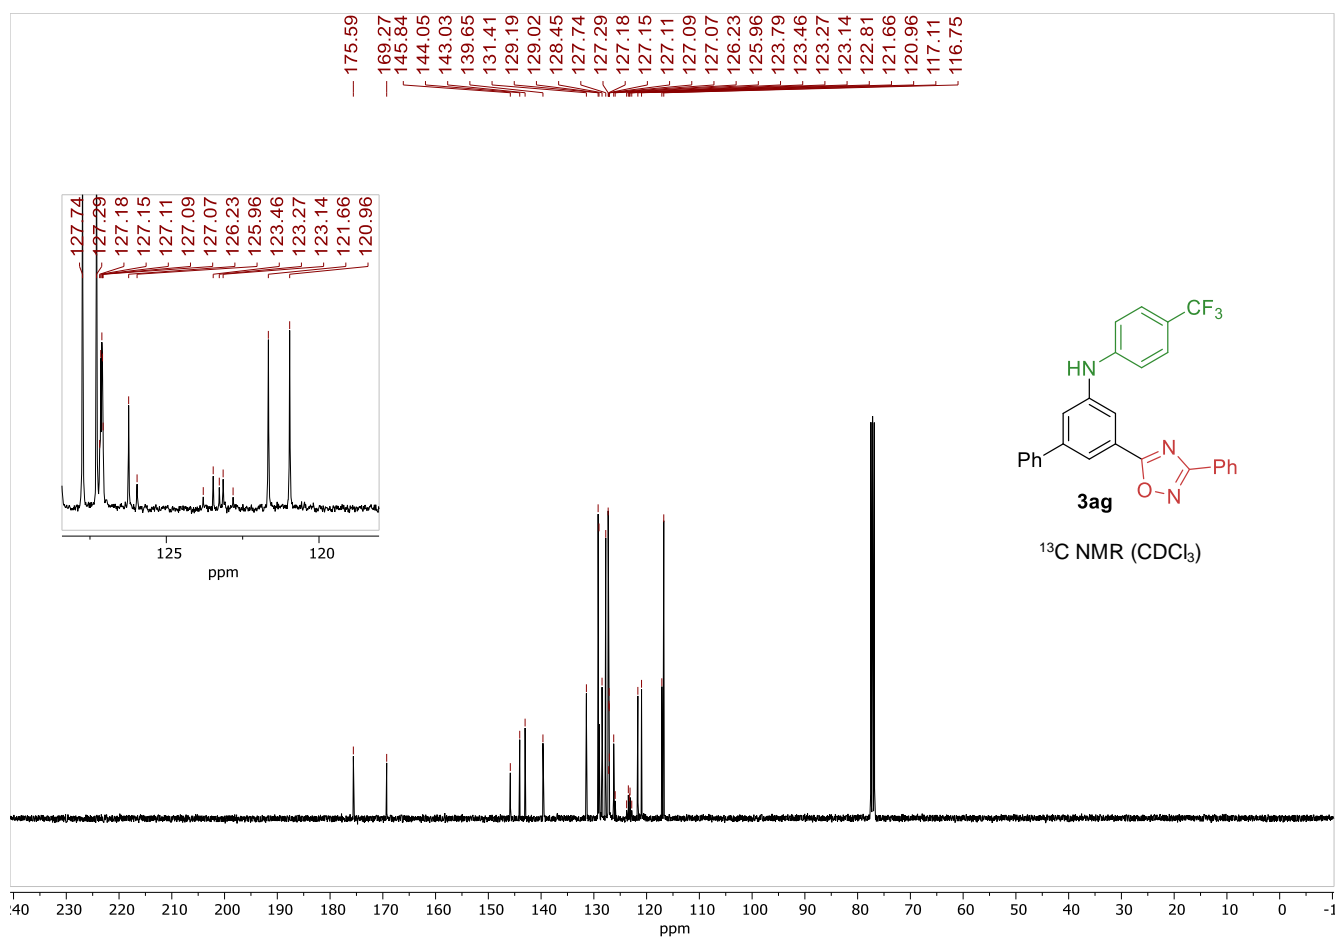

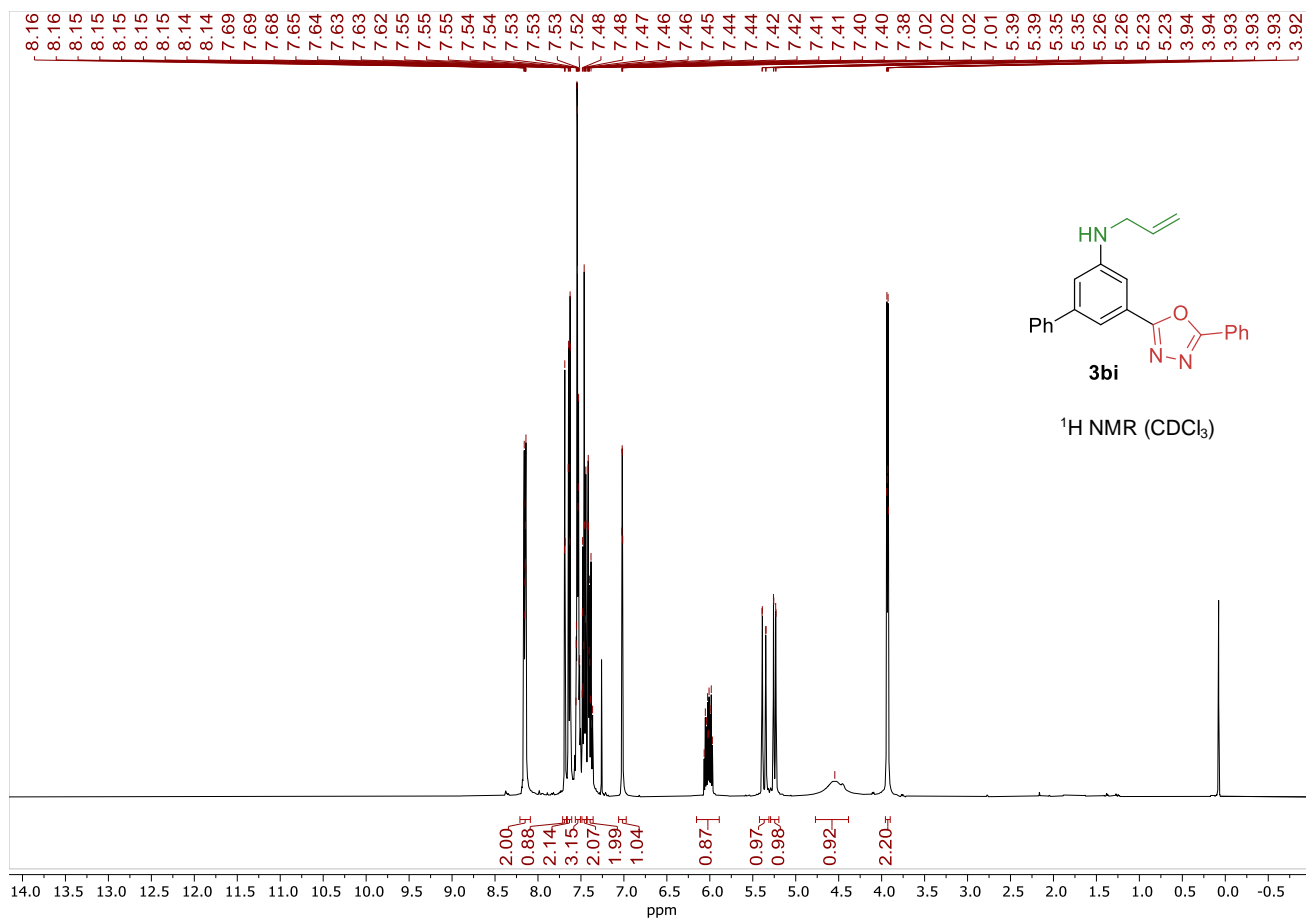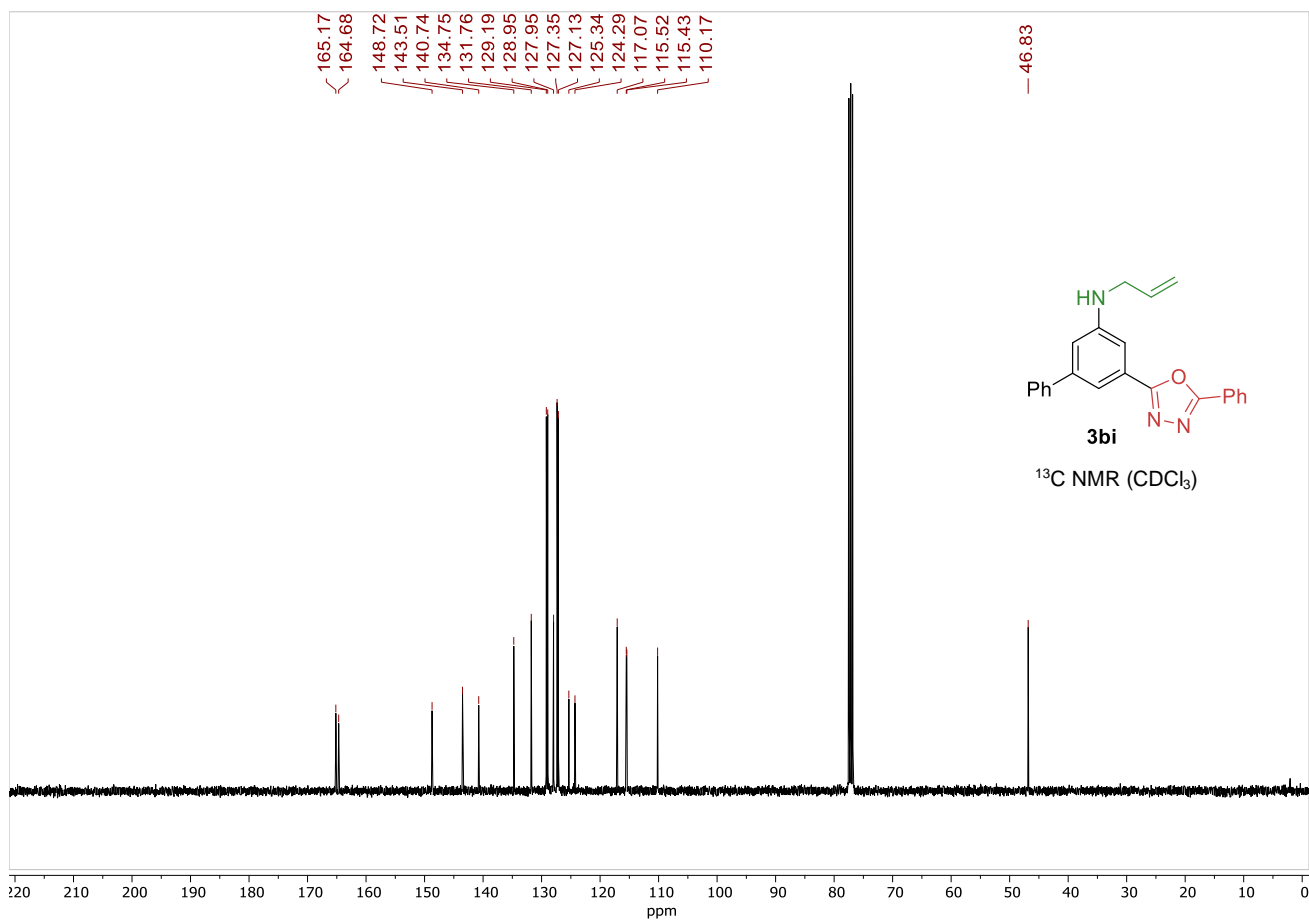

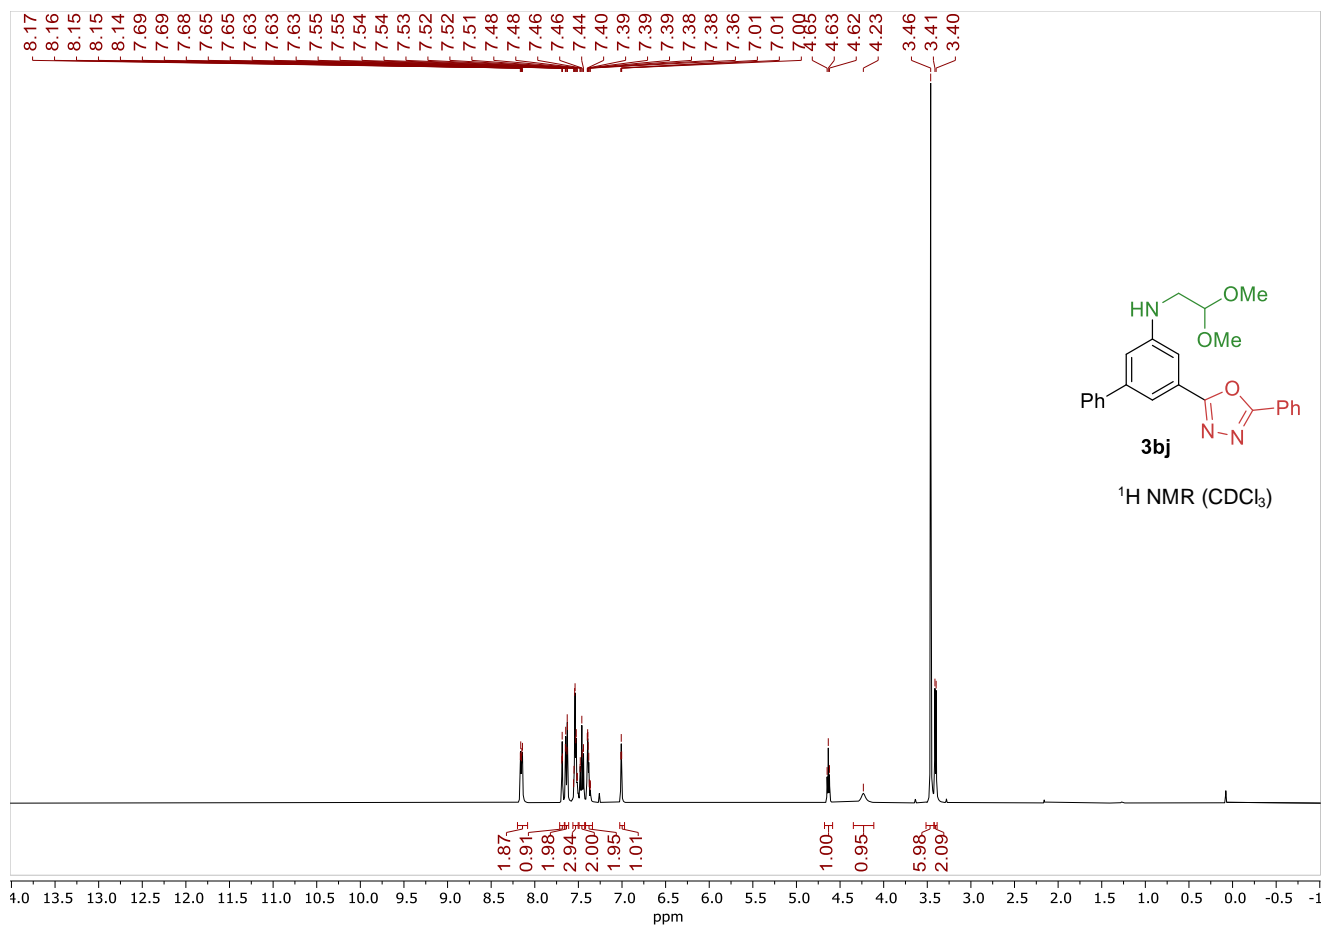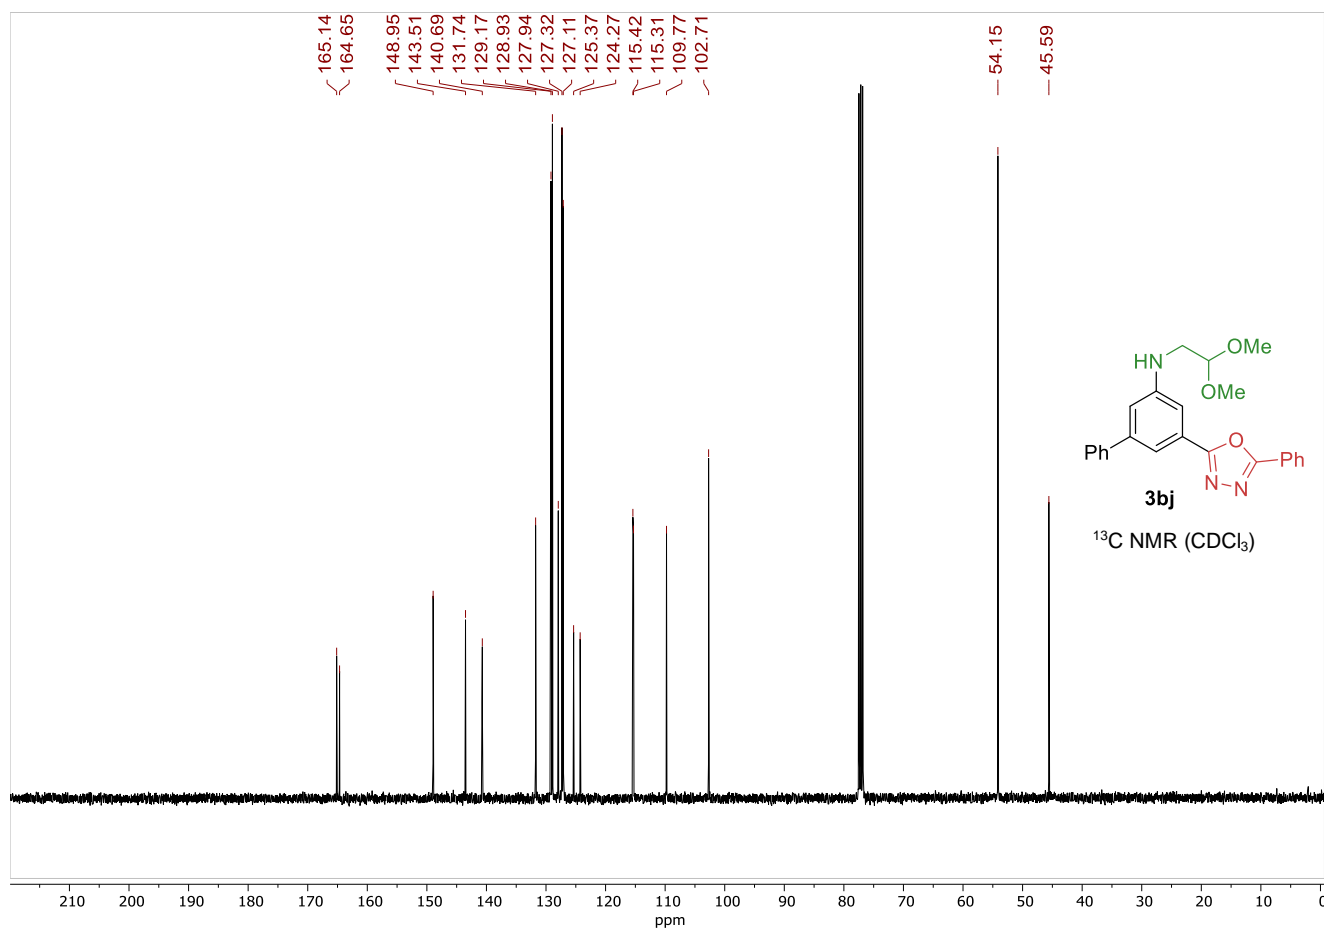



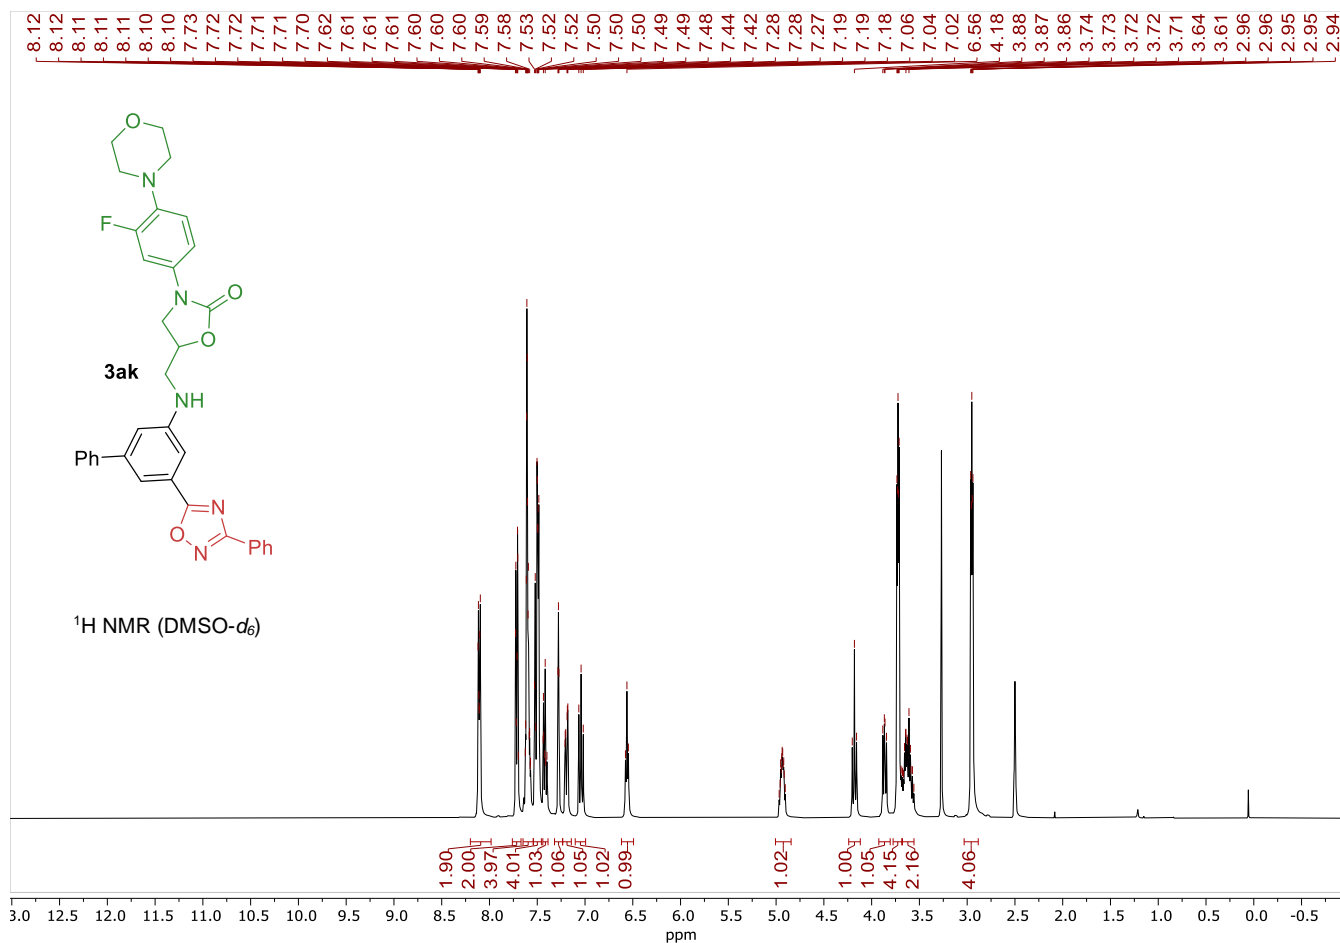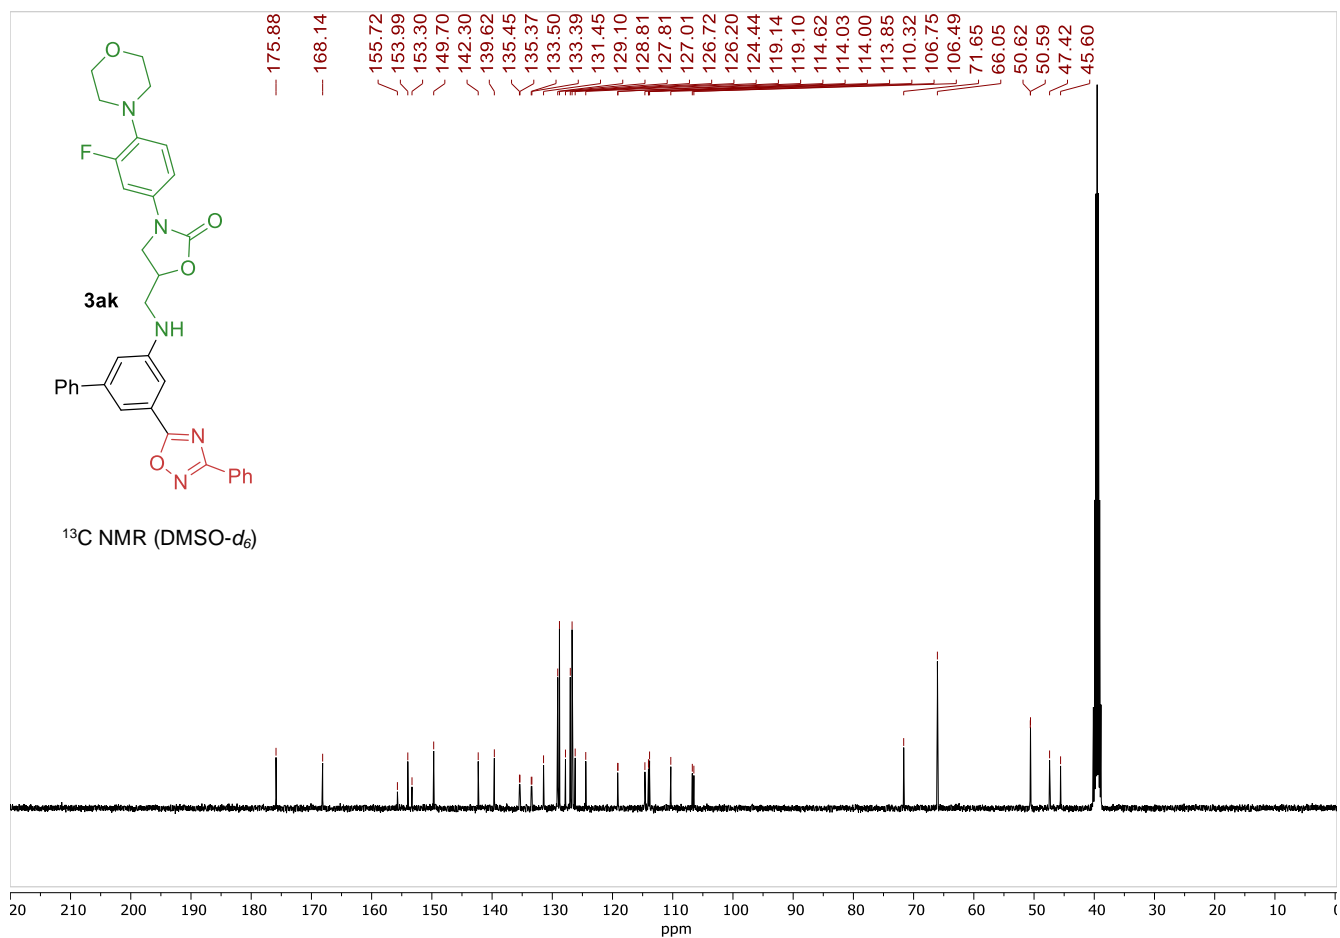

Supplement: Additional file 1 [file 1860-5397-20-188-S1.pdf]
